# Supplementary material for: LOXL2 from human amniotic mesenchymal stem cells accelerates wound epithelialization by promoting differentiation and migration of keratinocytes
Source: Aging (Albany NY). 2020 Jul 4;12(13):12960–86. doi: 10.18632/aging.103384 (PMC7377892; doi:10.18632/aging.103384)
Supplement: Supplementary Table 1 [file aging-12-103384-s003..xlsx]

## Sheet: hAMSCs-CM high expression-Other
GO Terms Level 1	GO Terms ID	GO Terms Level	GO Terms Description	Fisher's exact test P value	Protein accession	Protein description	Ratio	Regulated Type	P value	Gene name	Sequence coverage [%]	Mol. weight [kDa]	Score	MS/MS Counts	Peptides	Unique peptides	MS/MS Count E1	MS/MS Count E2	MS/MS Count E3	MS/MS Count M1	MS/MS Count M2	MS/MS Count M3	Peptides E1	Peptides E2	Peptides E3	Peptides M1	Peptides M2	Peptides M3	Unique peptides E1	Unique peptides E2	Unique peptides E3	Unique peptides M1	Unique peptides M2	Unique peptides M3	iBAQ E1	iBAQ E2	iBAQ E3	iBAQ M1	iBAQ M2	iBAQ M3	E1	E2	E3	M1	M2	M3
Biological Process	GO:0010648	6	negative regulation of cell communication	0.0361448	O14786	Neuropilin-1	13.08	Up	0.0148198	NRP1	9.2	103.13	64.877	11	6	6	1	0	1	1	4	4	1	1	1	3	6	5	1	1	1	3	6	5	126450	248210	86880	757100	3121500	2859100	0.112	0.204	0.207	0.634	2.307	3.9
Biological Process	GO:0010648	6	negative regulation of cell communication	0.0361448	Q96CG8	Collagen triple helix repeat-containing protein 1	20.075	Up	0.00065888	CTHRC1	34.2	26.224	67.085	21	7	7	3	0	0	5	7	6	4	3	2	7	7	5	4	3	2	7	7	5	5132900	5470900	1166300	105070000	144000000	32728000	0.112	0.111	0.069	2.158	2.609	1.095
Biological Process	GO:0010648	6	negative regulation of cell communication	0.0361448	Q92743	Serine protease HTRA1	142.747	Up	0.0025383	HTRA1	30.8	51.286	73.421	38	11	11	1	0	0	10	17	10	1	0	2	11	11	9	1	0	2	11	11	9	228840	0	294860	62973000	116070000	46017000	0.005		0.02	1.403	2.281	1.669
Biological Process	GO:0010648	6	negative regulation of cell communication	0.0361448	P35052	Glypican-1	6.895	Up	0.0086422	GPC1	12.9	61.68	23.613	12	5	5	0	0	0	4	3	5	2	1	1	4	5	4	2	1	1	4	5	4	724470	242550	240590	2585200	5283300	2729100	0.393	0.121	0.352	1.321	2.38	2.27
Biological Process	GO:0010648	6	negative regulation of cell communication	0.0361448	P08476	Inhibin beta A chain	24.045	Up	0.027082	INHBA	27.9	47.442	105.8	37	10	10	2	1	0	15	13	6	4	2	2	10	10	7	4	2	2	10	10	7	1176200	1032900	392470	51990000	22598000	5842500	0.091	0.074	0.081	3.776	1.448	0.691
Biological Process	GO:0010648	6	negative regulation of cell communication	0.0361448	Q15121	Astrocytic phosphoprotein PEA-15	1.671	Up	0.003376	PEA15	36.9	15.04	86.468	25	4	4	3	8	4	4	3	3	3	3	3	4	3	3	3	3	3	4	3	3	41944000	42713000	13669000	76379000	83011000	37015000	0.911	0.859	0.801	1.563	1.498	1.234
Biological Process	GO:0010648	6	negative regulation of cell communication	0.0361448	P50281	Matrix metalloproteinase-14	6.248	Up	0.033159	MMP14	4.3	65.893	17.655	4	2	2	1	0	1	1	1	0	1	0	1	1	2	0	1	0	1	1	2	0	560520	0	338470	3749200	6850500	0	0.208		0.34	1.311	2.113
Biological Process	GO:0010648	6	negative regulation of cell communication	0.0361448	P19022	Cadherin-2	10.125	Up	0.020937	CDH2	12.1	99.808	74.261	38	9	9	1	5	0	15	10	7	2	4	0	8	9	5	2	4	0	8	9	5	710180	2890000	0	22514000	22758000	7325000	0.067	0.254		2.013	1.795	1.067
Biological Process	GO:0010648	6	negative regulation of cell communication	0.0361448	P78417	Glutathione S-transferase omega-1	4.94	Up	0.025219	GSTO1	25.7	27.566	18.541	7	6	6	1	1	0	0	4	1	4	4	2	4	6	5	4	4	2	4	6	5	5431400	4685400	419600	15992000	27795000	10218000	0.539	0.43	0.112	1.494	2.291	1.555
Biological Process	GO:0010648	6	negative regulation of cell communication	0.0361448	Q14766	Latent-transforming growth factor beta-binding protein 1	4.831	Up	0.0028796	LTBP1	25.4	186.79	323.31	94	29	28	10	7	3	19	32	23	14	9	9	20	25	20	14	9	9	20	24	20	8951700	4890400	2393100	25294000	40787000	25227000	0.533	0.269	0.386	1.418	2.018	2.303
Biological Process	GO:0010648	6	negative regulation of cell communication	0.0361448	P05121	Plasminogen activator inhibitor 1	2.572	Up	0.0112754	SERPINE1	49.3	45.059	323.31	290	20	20	41	44	24	75	56	50	18	19	18	20	20	19	18	19	18	20	20	19	696760000	1081900000	342880000	3286900000	2170100000	1205400000	0.508	0.73	0.674	2.256	1.314	1.347
Biological Process	GO:0010648	6	negative regulation of cell communication	0.0361448	P04179	"Superoxide dismutase [Mn], mitochondrial"	2.098	Up	0.048243	SOD2	13.1	24.75	5.8097	10	3	3	1	1	1	2	2	3	2	1	1	3	3	3	2	1	1	3	3	3	14977000	22198000	4341500	24498000	36160000	30011000	0.726	0.995	0.568	1.118	1.455	2.229
Biological Process	GO:0010648	6	negative regulation of cell communication	0.0361448	P07093	Glia-derived nexin	11.771	Up	0.0067036	SERPINE2	46.2	44.002	169.23	127	17	17	12	5	6	33	47	24	12	9	9	16	16	14	12	9	9	16	16	14	132430000	37889000	41650000	871260000	2057200000	504660000	0.233	0.061	0.199	1.441	3.002	1.36
Biological Process	GO:0010648	6	negative regulation of cell communication	0.0361448	P22692	Insulin-like growth factor-binding protein 4	17.813	Up	0.0086171	IGFBP4	38.8	27.934	98.133	67	9	9	4	6	3	15	20	19	6	5	5	8	8	9	6	5	5	8	8	9	36356000	28060000	17389000	217170000	582750000	818450000	0.137	0.098	0.176	0.77	1.824	4.727
Biological Process	GO:0010648	6	negative regulation of cell communication	0.0361448	P07585	Decorin	45.345	Up	0.0174386	DCN	30.1	39.746	232.11	46	10	9	1	2	5	6	20	12	2	5	9	9	10	10	2	4	8	8	9	9	3435200	21371000	21981000	284750000	2299500000	1033400000	0.006	0.035	0.104	0.468	3.338	2.769
Biological Process	GO:0072175	8	epithelial tube formation	0.160355	Q96CG8	Collagen triple helix repeat-containing protein 1	20.075	Up	0.00065888	CTHRC1	34.2	26.224	67.085	21	7	7	3	0	0	5	7	6	4	3	2	7	7	5	4	3	2	7	7	5	5132900	5470900	1166300	105070000	144000000	32728000	0.112	0.111	0.069	2.158	2.609	1.095
Biological Process	GO:0072175	8	epithelial tube formation	0.160355	P62081	40S ribosomal protein S7	1.999	Up	0.039161	RPS7	11.3	22.127	7.5817	10	1	1	3	2	1	1	1	2	1	1	1	1	1	1	1	1	1	1	1	1	1194800	990110	493130	1619000	3003300	1871400	0.835	0.64	0.931	1.064	1.742	2.003
Biological Process	GO:0090287	5	regulation of cellular response to growth factor stimulus	0.0283765	Q14766	Latent-transforming growth factor beta-binding protein 1	4.831	Up	0.0028796	LTBP1	25.4	186.79	323.31	94	29	28	10	7	3	19	32	23	14	9	9	20	25	20	14	9	9	20	24	20	8951700	4890400	2393100	25294000	40787000	25227000	0.533	0.269	0.386	1.418	2.018	2.303
Biological Process	GO:0090287	5	regulation of cellular response to growth factor stimulus	0.0283765	Q92743	Serine protease HTRA1	142.747	Up	0.0025383	HTRA1	30.8	51.286	73.421	38	11	11	1	0	0	10	17	10	1	0	2	11	11	9	1	0	2	11	11	9	228840	0	294860	62973000	116070000	46017000	0.005		0.02	1.403	2.281	1.669
Biological Process	GO:0090287	5	regulation of cellular response to growth factor stimulus	0.0283765	P35052	Glypican-1	6.895	Up	0.0086422	GPC1	12.9	61.68	23.613	12	5	5	0	0	0	4	3	5	2	1	1	4	5	4	2	1	1	4	5	4	724470	242550	240590	2585200	5283300	2729100	0.393	0.121	0.352	1.321	2.38	2.27
Biological Process	GO:0090287	5	regulation of cellular response to growth factor stimulus	0.0283765	O00622	Protein CYR61	7.006	Up	0.027799	CYR61	27.3	42.026	33.987	23	8	8	3	2	2	8	5	3	5	2	3	7	6	5	5	2	3	7	6	5	7543100	2060100	876710	48582000	13641000	16819000	0.54	0.136	0.17	3.272	0.81	1.845
Biological Process	GO:0090287	5	regulation of cellular response to growth factor stimulus	0.0283765	P07585	Decorin	45.345	Up	0.0174386	DCN	30.1	39.746	232.11	46	10	9	1	2	5	6	20	12	2	5	9	9	10	10	2	4	8	8	9	9	3435200	21371000	21981000	284750000	2299500000	1033400000	0.006	0.035	0.104	0.468	3.338	2.769

## Sheet: UP-wound healing
GO Terms Level 1	GO Terms ID	GO Terms Level	GO Terms Description	Fisher's exact test P value	Protein accession	Protein description	Ratio	Regulated Type	P value	Gene name	Sequence coverage [%]	Mol. weight [kDa]	Score	MS/MS Counts	Peptides	Unique peptides	MS/MS Count E1	MS/MS Count E2	MS/MS Count E3	MS/MS Count M1	MS/MS Count M2	MS/MS Count M3	Peptides E1	Peptides E2	Peptides E3	Peptides M1	Peptides M2	Peptides M3	Unique peptides E1	Unique peptides E2	Unique peptides E3	Unique peptides M1	Unique peptides M2	Unique peptides M3	iBAQ E1	iBAQ E2	iBAQ E3	iBAQ M1	iBAQ M2	iBAQ M3	E1	E2	E3	M1	M2	M3
Biological Process	GO:0042060	5	wound healing	0.00154058	P08123	Collagen alpha-2(I) chain	7.798	Up	0.025324	COL1A2	68.7	129.31	323.31	518	61	60	60	54	19	146	96	143	52	48	28	60	59	59	51	47	27	59	58	58	278620000	258050000	34024000	1623600000	685150000	1723900000	0.387	0.332	0.127	2.127	0.792	3.678
Biological Process	GO:0042060	5	wound healing	0.00154058	P08758	Annexin A5	2.726	Up	0.0091631	ANXA5	46.6	35.936	105.18	76	14	14	12	14	7	12	18	13	10	13	11	14	13	12	10	13	11	14	13	12	74821000	120100000	31328000	179380000	350450000	181030000	0.511	0.759	0.579	1.155	1.989	1.897
Biological Process	GO:0042060	5	wound healing	0.00154058	P35579	Myosin-9	2.091	Up	0.042662	MYH9	33.2	226.53	323.31	219	57	45	38	21	11	44	74	31	41	36	21	48	55	43	33	30	19	38	45	35	14494000	8704600	4148000	18023000	38284000	14179000	0.949	0.527	0.732	1.111	2.082	1.424
Biological Process	GO:0042060	5	wound healing	0.00154058	P24844	Myosin regulatory light polypeptide 9	3.29	Up	0.026878	MYL9	56.4	19.827	9.1428	6	8	2	1	1	0	2	2	0	7	6	5	7	8	4	1	2	1	2	2	0	1332300	3010100	608760	7647700	6530500	0	0.371	0.777	0.458	2.009	1.513
Biological Process	GO:0042060	5	wound healing	0.00154058	Q9GZP0	Platelet-derived growth factor D	16.251	Up	0.0095559	PDGFD	13.2	42.848	9.1286	11	4	4	1	0	1	2	2	5	1	1	1	3	3	4	1	1	1	3	3	4	175330	1553700	111740	11601000	7599100	8976200	0.037	0.307	0.063	2.331	1.347	2.936
Biological Process	GO:0042060	5	wound healing	0.00154058	P02461	Collagen alpha-1(III) chain	18.249	Up	0.00135962	COL3A1	55.5	138.56	323.31	349	60	45	21	9	10	97	117	95	28	18	15	56	57	57	18	12	9	42	42	42	57554000	29731000	34116000	850330000	1397000000	817160000	0.115	0.055	0.184	1.609	2.332	2.519
Biological Process	GO:0042060	5	wound healing	0.00154058	Q15063	Periostin	16.047	Up	0.031338	POSTN	48.9	93.313	323.31	109	31	13	0	15	1	22	42	29	5	23	5	28	31	28	1	10	1	11	13	11	1390500	63201000	1462900	154150000	583880000	255670000	0.009	0.353	0.023	0.877	2.931	2.37
Biological Process	GO:0042060	5	wound healing	0.00154058	P01033	Metalloproteinase inhibitor 1	25.345	Up	0.0029956	TIMP1	45.4	23.171	295.74	105	7	7	7	8	7	23	36	24	6	5	7	7	7	7	6	5	7	7	7	7	123160000	233850000	201930000	5162900000	14404000000	3598700000	0.033	0.058	0.147	1.313	3.23	1.489
Biological Process	GO:0042060	5	wound healing	0.00154058	Q9UNN8	Endothelial protein C receptor	4.576	Up	0.026459	PROCR	3.8	26.671	1.5589	2	1	1	0	0	0	1	1	0	1	1	1	1	1	1	1	1	1	1	1	1	669160	1232300	170330	3702900	4083400	2281000	0.353	0.601	0.242	1.839	1.789	1.845
Biological Process	GO:0042060	5	wound healing	0.00154058	P07093	Glia-derived nexin	11.771	Up	0.0067036	SERPINE2	46.2	44.002	169.23	127	17	17	12	5	6	33	47	24	12	9	9	16	16	14	12	9	9	16	16	14	132430000	37889000	41650000	871260000	2057200000	504660000	0.233	0.061	0.199	1.441	3.002	1.36
Biological Process	GO:0042060	5	wound healing	0.00154058	O00622	Protein CYR61	7.006	Up	0.027799	CYR61	27.3	42.026	33.987	23	8	8	3	2	2	8	5	3	5	2	3	7	6	5	5	2	3	7	6	5	7543100	2060100	876710	48582000	13641000	16819000	0.54	0.136	0.17	3.272	0.81	1.845
Biological Process	GO:0042060	5	wound healing	0.00154058	P07585	Decorin	45.345	Up	0.0174386	DCN	30.1	39.746	232.11	46	10	9	1	2	5	6	20	12	2	5	9	9	10	10	2	4	8	8	9	9	3435200	21371000	21981000	284750000	2299500000	1033400000	0.006	0.035	0.104	0.468	3.338	2.769
Biological Process	GO:0061041	7	regulation of wound healing	0.295071	P05121	Plasminogen activator inhibitor 1	2.572	Up	0.0112754	SERPINE1	49.3	45.059	323.31	290	20	20	41	44	24	75	56	50	18	19	18	20	20	19	18	19	18	20	20	19	696760000	1081900000	342880000	3286900000	2170100000	1205400000	0.508	0.73	0.674	2.256	1.314	1.347
Biological Process	GO:0061041	7	regulation of wound healing	0.295071	P07093	Glia-derived nexin	11.771	Up	0.0067036	SERPINE2	46.2	44.002	169.23	127	17	17	12	5	6	33	47	24	12	9	9	16	16	14	12	9	9	16	16	14	132430000	37889000	41650000	871260000	2057200000	504660000	0.233	0.061	0.199	1.441	3.002	1.36
Biological Process	GO:0061045	8	negative regulation of wound healing	0.144352	P05121	Plasminogen activator inhibitor 1	2.572	Up	0.0112754	SERPINE1	49.3	45.059	323.31	290	20	20	41	44	24	75	56	50	18	19	18	20	20	19	18	19	18	20	20	19	696760000	1081900000	342880000	3286900000	2170100000	1205400000	0.508	0.73	0.674	2.256	1.314	1.347
Biological Process	GO:0061045	8	negative regulation of wound healing	0.144352	P07093	Glia-derived nexin	11.771	Up	0.0067036	SERPINE2	46.2	44.002	169.23	127	17	17	12	5	6	33	47	24	12	9	9	16	16	14	12	9	9	16	16	14	132430000	37889000	41650000	871260000	2057200000	504660000	0.233	0.061	0.199	1.441	3.002	1.36
Biological Process	GO:0001838	9	embryonic epithelial tube formation	0.144352	Q96CG8	Collagen triple helix repeat-containing protein 1	20.075	Up	0.00065888	CTHRC1	34.2	26.224	67.085	21	7	7	3	0	0	5	7	6	4	3	2	7	7	5	4	3	2	7	7	5	5132900	5470900	1166300	105070000	144000000	32728000	0.112	0.111	0.069	2.158	2.609	1.095
Biological Process	GO:0001838	9	embryonic epithelial tube formation	0.144352	P62081	40S ribosomal protein S7	1.999	Up	0.039161	RPS7	11.3	22.127	7.5817	10	1	1	3	2	1	1	1	2	1	1	1	1	1	1	1	1	1	1	1	1	1194800	990110	493130	1619000	3003300	1871400	0.835	0.64	0.931	1.064	1.742	2.003
Biological Process	GO:0009611	4	response to wounding	0.000205306	P08123	Collagen alpha-2(I) chain	7.798	Up	0.025324	COL1A2	68.7	129.31	323.31	518	61	60	60	54	19	146	96	143	52	48	28	60	59	59	51	47	27	59	58	58	278620000	258050000	34024000	1623600000	685150000	1723900000	0.387	0.332	0.127	2.127	0.792	3.678
Biological Process	GO:0009611	4	response to wounding	0.000205306	P08758	Annexin A5	2.726	Up	0.0091631	ANXA5	46.6	35.936	105.18	76	14	14	12	14	7	12	18	13	10	13	11	14	13	12	10	13	11	14	13	12	74821000	120100000	31328000	179380000	350450000	181030000	0.511	0.759	0.579	1.155	1.989	1.897
Biological Process	GO:0009611	4	response to wounding	0.000205306	O14786	Neuropilin-1	13.08	Up	0.0148198	NRP1	9.2	103.13	64.877	11	6	6	1	0	1	1	4	4	1	1	1	3	6	5	1	1	1	3	6	5	126450	248210	86880	757100	3121500	2859100	0.112	0.204	0.207	0.634	2.307	3.9
Biological Process	GO:0009611	4	response to wounding	0.000205306	P35579	Myosin-9	2.091	Up	0.042662	MYH9	33.2	226.53	323.31	219	57	45	38	21	11	44	74	31	41	36	21	48	55	43	33	30	19	38	45	35	14494000	8704600	4148000	18023000	38284000	14179000	0.949	0.527	0.732	1.111	2.082	1.424
Biological Process	GO:0009611	4	response to wounding	0.000205306	P09382	Galectin-1	3.787	Up	0.00191859	LGALS1	64.4	14.716	282.85	94	8	8	15	18	8	17	19	17	7	8	6	8	8	8	7	8	6	8	8	8	273840000	282090000	69357000	724230000	1303200000	632750000	0.534	0.508	0.366	1.33	2.11	1.892
Biological Process	GO:0009611	4	response to wounding	0.000205306	P24844	Myosin regulatory light polypeptide 9	3.29	Up	0.026878	MYL9	56.4	19.827	9.1428	6	8	2	1	1	0	2	2	0	7	6	5	7	8	4	1	2	1	2	2	0	1332300	3010100	608760	7647700	6530500	0	0.371	0.777	0.458	2.009	1.513
Biological Process	GO:0009611	4	response to wounding	0.000205306	Q9GZP0	Platelet-derived growth factor D	16.251	Up	0.0095559	PDGFD	13.2	42.848	9.1286	11	4	4	1	0	1	2	2	5	1	1	1	3	3	4	1	1	1	3	3	4	175330	1553700	111740	11601000	7599100	8976200	0.037	0.307	0.063	2.331	1.347	2.936
Biological Process	GO:0009611	4	response to wounding	0.000205306	O00339	Matrilin-2	5.582	Up	0.020144	MATN2	19	106.84	96.642	41	16	16	4	0	1	11	19	6	5	1	3	14	15	10	5	1	3	14	15	10	3198400	1689900	1925900	15212000	36530000	7126800	0.312	0.152	0.507	1.397	2.958	1.065
Biological Process	GO:0009611	4	response to wounding	0.000205306	P02461	Collagen alpha-1(III) chain	18.249	Up	0.00135962	COL3A1	55.5	138.56	323.31	349	60	45	21	9	10	97	117	95	28	18	15	56	57	57	18	12	9	42	42	42	57554000	29731000	34116000	850330000	1397000000	817160000	0.115	0.055	0.184	1.609	2.332	2.519
Biological Process	GO:0009611	4	response to wounding	0.000205306	Q15063	Periostin	16.047	Up	0.031338	POSTN	48.9	93.313	323.31	109	31	13	0	15	1	22	42	29	5	23	5	28	31	28	1	10	1	11	13	11	1390500	63201000	1462900	154150000	583880000	255670000	0.009	0.353	0.023	0.877	2.931	2.37
Biological Process	GO:0009611	4	response to wounding	0.000205306	P01033	Metalloproteinase inhibitor 1	25.345	Up	0.0029956	TIMP1	45.4	23.171	295.74	105	7	7	7	8	7	23	36	24	6	5	7	7	7	7	6	5	7	7	7	7	123160000	233850000	201930000	5162900000	14404000000	3598700000	0.033	0.058	0.147	1.313	3.23	1.489
Biological Process	GO:0009611	4	response to wounding	0.000205306	Q9UNN8	Endothelial protein C receptor	4.576	Up	0.026459	PROCR	3.8	26.671	1.5589	2	1	1	0	0	0	1	1	0	1	1	1	1	1	1	1	1	1	1	1	1	669160	1232300	170330	3702900	4083400	2281000	0.353	0.601	0.242	1.839	1.789	1.845
Biological Process	GO:0009611	4	response to wounding	0.000205306	P07093	Glia-derived nexin	11.771	Up	0.0067036	SERPINE2	46.2	44.002	169.23	127	17	17	12	5	6	33	47	24	12	9	9	16	16	14	12	9	9	16	16	14	132430000	37889000	41650000	871260000	2057200000	504660000	0.233	0.061	0.199	1.441	3.002	1.36
Biological Process	GO:0009611	4	response to wounding	0.000205306	O00622	Protein CYR61	7.006	Up	0.027799	CYR61	27.3	42.026	33.987	23	8	8	3	2	2	8	5	3	5	2	3	7	6	5	5	2	3	7	6	5	7543100	2060100	876710	48582000	13641000	16819000	0.54	0.136	0.17	3.272	0.81	1.845
Biological Process	GO:0009611	4	response to wounding	0.000205306	P07585	Decorin	45.345	Up	0.0174386	DCN	30.1	39.746	232.11	46	10	9	1	2	5	6	20	12	2	5	9	9	10	10	2	4	8	8	9	9	3435200	21371000	21981000	284750000	2299500000	1033400000	0.006	0.035	0.104	0.468	3.338	2.769
Biological Process	GO:1903035	7	negative regulation of response to wounding	0.144352	P05121	Plasminogen activator inhibitor 1	2.572	Up	0.0112754	SERPINE1	49.3	45.059	323.31	290	20	20	41	44	24	75	56	50	18	19	18	20	20	19	18	19	18	20	20	19	696760000	1081900000	342880000	3286900000	2170100000	1205400000	0.508	0.73	0.674	2.256	1.314	1.347
Biological Process	GO:1903035	7	negative regulation of response to wounding	0.144352	P07093	Glia-derived nexin	11.771	Up	0.0067036	SERPINE2	46.2	44.002	169.23	127	17	17	12	5	6	33	47	24	12	9	9	16	16	14	12	9	9	16	16	14	132430000	37889000	41650000	871260000	2057200000	504660000	0.233	0.061	0.199	1.441	3.002	1.36
Biological Process	GO:0048771	4	tissue remodeling	0.226888	Q96CG8	Collagen triple helix repeat-containing protein 1	20.075	Up	0.00065888	CTHRC1	34.2	26.224	67.085	21	7	7	3	0	0	5	7	6	4	3	2	7	7	5	4	3	2	7	7	5	5132900	5470900	1166300	105070000	144000000	32728000	0.112	0.111	0.069	2.158	2.609	1.095
Biological Process	GO:0048771	4	tissue remodeling	0.226888	P50281	Matrix metalloproteinase-14	6.248	Up	0.033159	MMP14	4.3	65.893	17.655	4	2	2	1	0	1	1	1	0	1	0	1	1	2	0	1	0	1	1	2	0	560520	0	338470	3749200	6850500	0	0.208		0.34	1.311	2.113
Biological Process	GO:0009888	4	tissue development	0.00148967	O14786	Neuropilin-1	13.08	Up	0.0148198	NRP1	9.2	103.13	64.877	11	6	6	1	0	1	1	4	4	1	1	1	3	6	5	1	1	1	3	6	5	126450	248210	86880	757100	3121500	2859100	0.112	0.204	0.207	0.634	2.307	3.9
Biological Process	GO:0009888	4	tissue development	0.00148967	Q9Y4K0	Lysyl oxidase homolog 2	97.971	Up	0.00178461	LOXL2	39.8	86.724	323.31	106	26	26	2	0	0	33	40	31	3	3	1	25	26	24	3	3	1	25	26	24	666620	5011100	1170400	194120000	312420000	232340000	0.005	0.039	0.026	1.57	2.229	3.059
Biological Process	GO:0009888	4	tissue development	0.00148967	P02462	Collagen alpha-1(IV) chain	12.585	Up	0.0074763	COL4A1	7.3	160.61	38.958	27	8	5	1	1	0	11	8	6	2	1	2	7	7	6	0	0	0	4	5	4	1384800	707960	416020	14184000	16730000	8212900	0.213	0.101	0.173	2.054	2.137	1.938
Biological Process	GO:0009888	4	tissue development	0.00148967	P50281	Matrix metalloproteinase-14	6.248	Up	0.033159	MMP14	4.3	65.893	17.655	4	2	2	1	0	1	1	1	0	1	0	1	1	2	0	1	0	1	1	2	0	560520	0	338470	3749200	6850500	0	0.208		0.34	1.311	2.113
Biological Process	GO:0009888	4	tissue development	0.00148967	P02461	Collagen alpha-1(III) chain	18.249	Up	0.00135962	COL3A1	55.5	138.56	323.31	349	60	45	21	9	10	97	117	95	28	18	15	56	57	57	18	12	9	42	42	42	57554000	29731000	34116000	850330000	1397000000	817160000	0.115	0.055	0.184	1.609	2.332	2.519
Biological Process	GO:0009888	4	tissue development	0.00148967	P08572	Collagen alpha-2(IV) chain	62.4	Up	1.65779e-05	COL4A2	24.6	167.55	323.31	96	29	29	1	1	0	26	43	25	4	3	2	24	25	22	4	3	2	24	25	22	977530	882140	266530	42672000	70553000	37748000	0.041	0.035	0.029	1.68	2.451	2.421
Biological Process	GO:0009888	4	tissue development	0.00148967	Q16394	Exostosin-1	3.011	Up	0.014302	EXT1	4	86.254	4.0604	4	3	3	0	0	0	1	2	1	2	2	2	1	3	2	2	2	2	1	3	2	467150	251380	119070	932490	1693100	516750	0.751	0.374	0.519	1.413	2.262	1.275
Biological Process	GO:0009888	4	tissue development	0.00148967	Q99715	Collagen alpha-1(XII) chain	5.4	Up	0.0189392	COL12A1	37.2	333.14	323.31	395	92	91	31	24	37	103	106	94	54	37	56	81	86	81	53	36	55	80	85	80	15273000	8991000	14633000	112480000	98758000	99484000	0.28	0.152	0.723	1.94	1.503	2.794
Biological Process	GO:0009888	4	tissue development	0.00148967	P07093	Glia-derived nexin	11.771	Up	0.0067036	SERPINE2	46.2	44.002	169.23	127	17	17	12	5	6	33	47	24	12	9	9	16	16	14	12	9	9	16	16	14	132430000	37889000	41650000	871260000	2057200000	504660000	0.233	0.061	0.199	1.441	3.002	1.36
Biological Process	GO:0009888	4	tissue development	0.00148967	O00622	Protein CYR61	7.006	Up	0.027799	CYR61	27.3	42.026	33.987	23	8	8	3	2	2	8	5	3	5	2	3	7	6	5	5	2	3	7	6	5	7543100	2060100	876710	48582000	13641000	16819000	0.54	0.136	0.17	3.272	0.81	1.845
Biological Process	GO:0009888	4	tissue development	0.00148967	Q96CG8	Collagen triple helix repeat-containing protein 1	20.075	Up	0.00065888	CTHRC1	34.2	26.224	67.085	21	7	7	3	0	0	5	7	6	4	3	2	7	7	5	4	3	2	7	7	5	5132900	5470900	1166300	105070000	144000000	32728000	0.112	0.111	0.069	2.158	2.609	1.095
Biological Process	GO:0009888	4	tissue development	0.00148967	P08476	Inhibin beta A chain	24.045	Up	0.027082	INHBA	27.9	47.442	105.8	37	10	10	2	1	0	15	13	6	4	2	2	10	10	7	4	2	2	10	10	7	1176200	1032900	392470	51990000	22598000	5842500	0.091	0.074	0.081	3.776	1.448	0.691
Biological Process	GO:0009888	4	tissue development	0.00148967	P50454	Serpin H1	7.353	Up	0.0127612	SERPINH1	34.4	46.44	119.61	80	12	12	7	10	3	17	25	18	9	9	4	11	12	12	9	9	4	11	12	12	11074000	32089000	3548700	64210000	168460000	111280000	0.181	0.487	0.159	0.991	2.293	2.797
Biological Process	GO:0009888	4	tissue development	0.00148967	P19022	Cadherin-2	10.125	Up	0.020937	CDH2	12.1	99.808	74.261	38	9	9	1	5	0	15	10	7	2	4	0	8	9	5	2	4	0	8	9	5	710180	2890000	0	22514000	22758000	7325000	0.067	0.254		2.013	1.795	1.067
Biological Process	GO:0009888	4	tissue development	0.00148967	P62081	40S ribosomal protein S7	1.999	Up	0.039161	RPS7	11.3	22.127	7.5817	10	1	1	3	2	1	1	1	2	1	1	1	1	1	1	1	1	1	1	1	1	1194800	990110	493130	1619000	3003300	1871400	0.835	0.64	0.931	1.064	1.742	2.003
Biological Process	GO:0009888	4	tissue development	0.00148967	Q15063	Periostin	16.047	Up	0.031338	POSTN	48.9	93.313	323.31	109	31	13	0	15	1	22	42	29	5	23	5	28	31	28	1	10	1	11	13	11	1390500	63201000	1462900	154150000	583880000	255670000	0.009	0.353	0.023	0.877	2.931	2.37
Biological Process	GO:0009888	4	tissue development	0.00148967	Q02809	"Procollagen-lysine,2-oxoglutarate 5-dioxygenase 1"	3.684	Up	0.04362	PLOD1	38.2	83.549	276.84	99	21	21	10	5	12	23	32	17	12	10	12	17	19	14	12	10	12	17	19	14	14391000	5674600	10597000	59613000	91870000	29502000	0.435	0.159	0.865	1.698	2.309	1.368
Biological Process	GO:0009888	4	tissue development	0.00148967	P01033	Metalloproteinase inhibitor 1	25.345	Up	0.0029956	TIMP1	45.4	23.171	295.74	105	7	7	7	8	7	23	36	24	6	5	7	7	7	7	6	5	7	7	7	7	123160000	233850000	201930000	5162900000	14404000000	3598700000	0.033	0.058	0.147	1.313	3.23	1.489
Biological Process	GO:0009888	4	tissue development	0.00148967	P12109	Collagen alpha-1(VI) chain	26.254	Up	0.0053796	COL6A1	44.7	108.53	323.31	194	34	34	6	23	7	47	48	63	10	19	11	31	30	34	10	19	11	31	30	34	6479800	39144000	7500000	451200000	341550000	618780000	0.029	0.158	0.089	1.857	1.24	4.149
Biological Process	GO:0009888	4	tissue development	0.00148967	P07585	Decorin	45.345	Up	0.0174386	DCN	30.1	39.746	232.11	46	10	9	1	2	5	6	20	12	2	5	9	9	10	10	2	4	8	8	9	9	3435200	21371000	21981000	284750000	2299500000	1033400000	0.006	0.035	0.104	0.468	3.338	2.769
Biological Process	GO:1903034	6	regulation of response to wounding	0.328994	P05121	Plasminogen activator inhibitor 1	2.572	Up	0.0112754	SERPINE1	49.3	45.059	323.31	290	20	20	41	44	24	75	56	50	18	19	18	20	20	19	18	19	18	20	20	19	696760000	1081900000	342880000	3286900000	2170100000	1205400000	0.508	0.73	0.674	2.256	1.314	1.347
Biological Process	GO:1903034	6	regulation of response to wounding	0.328994	P07093	Glia-derived nexin	11.771	Up	0.0067036	SERPINE2	46.2	44.002	169.23	127	17	17	12	5	6	33	47	24	12	9	9	16	16	14	12	9	9	16	16	14	132430000	37889000	41650000	871260000	2057200000	504660000	0.233	0.061	0.199	1.441	3.002	1.36
Biological Process	GO:0043588	7	skin development	0.195329	P08123	Collagen alpha-2(I) chain	7.798	Up	0.025324	COL1A2	68.7	129.31	323.31	518	61	60	60	54	19	146	96	143	52	48	28	60	59	59	51	47	27	59	58	58	278620000	258050000	34024000	1623600000	685150000	1723900000	0.387	0.332	0.127	2.127	0.792	3.678
Biological Process	GO:0043588	7	skin development	0.195329	P08476	Inhibin beta A chain	24.045	Up	0.027082	INHBA	27.9	47.442	105.8	37	10	10	2	1	0	15	13	6	4	2	2	10	10	7	4	2	2	10	10	7	1176200	1032900	392470	51990000	22598000	5842500	0.091	0.074	0.081	3.776	1.448	0.691
Biological Process	GO:0043588	7	skin development	0.195329	P02461	Collagen alpha-1(III) chain	18.249	Up	0.00135962	COL3A1	55.5	138.56	323.31	349	60	45	21	9	10	97	117	95	28	18	15	56	57	57	18	12	9	42	42	42	57554000	29731000	34116000	850330000	1397000000	817160000	0.115	0.055	0.184	1.609	2.332	2.519

## Sheet: UP-cell differentiation
GO Terms Level 1	GO Terms ID	GO Terms Level	GO Terms Description	Fisher's exact test P value	Protein accession	Protein description	Ratio	Regulated Type	P value	Gene name	Sequence coverage [%]	Mol. weight [kDa]	Score	MS/MS Counts	Peptides	Unique peptides	MS/MS Count E1	MS/MS Count E2	MS/MS Count E3	MS/MS Count M1	MS/MS Count M2	MS/MS Count M3	Peptides E1	Peptides E2	Peptides E3	Peptides M1	Peptides M2	Peptides M3	Unique peptides E1	Unique peptides E2	Unique peptides E3	Unique peptides M1	Unique peptides M2	Unique peptides M3	iBAQ E1	iBAQ E2	iBAQ E3	iBAQ M1	iBAQ M2	iBAQ M3	E1	E2	E3	M1	M2	M3
Biological Process	GO:0030154	5	cell differentiation	0.0050464	Q9BUD6	Spondin-2	184.242	Up	0.00041536	SPON2	36	35.846	228.89	60	10	10	0	1	0	18	26	15	3	3	2	10	10	9	3	3	2	10	10	9	2450400	2740400	2753300	531960000	1504000000	325430000	0.006	0.007	0.02	1.354	3.377	1.349
Biological Process	GO:0030154	5	cell differentiation	0.0050464	O14786	Neuropilin-1	13.08	Up	0.0148198	NRP1	9.2	103.13	64.877	11	6	6	1	0	1	1	4	4	1	1	1	3	6	5	1	1	1	3	6	5	126450	248210	86880	757100	3121500	2859100	0.112	0.204	0.207	0.634	2.307	3.9
Biological Process	GO:0030154	5	cell differentiation	0.0050464	Q9Y4K0	Lysyl oxidase homolog 2	97.971	Up	0.00178461	LOXL2	39.8	86.724	323.31	106	26	26	2	0	0	33	40	31	3	3	1	25	26	24	3	3	1	25	26	24	666620	5011100	1170400	194120000	312420000	232340000	0.005	0.039	0.026	1.57	2.229	3.059
Biological Process	GO:0030154	5	cell differentiation	0.0050464	Q92743	Serine protease HTRA1	142.747	Up	0.0025383	HTRA1	30.8	51.286	73.421	38	11	11	1	0	0	10	17	10	1	0	2	11	11	9	1	0	2	11	11	9	228840	0	294860	62973000	116070000	46017000	0.005		0.02	1.403	2.281	1.669
Biological Process	GO:0030154	5	cell differentiation	0.0050464	P35052	Glypican-1	6.895	Up	0.0086422	GPC1	12.9	61.68	23.613	12	5	5	0	0	0	4	3	5	2	1	1	4	5	4	2	1	1	4	5	4	724470	242550	240590	2585200	5283300	2729100	0.393	0.121	0.352	1.321	2.38	2.27
Biological Process	GO:0030154	5	cell differentiation	0.0050464	P36955	Pigment epithelium-derived factor	5.022	Up	0.042517	SERPINF1	31.1	46.312	90.643	59	13	9	6	4	5	13	17	14	5	6	5	11	12	12	1	2	1	7	8	8	24428000	22346000	22355000	75787000	187740000	197270000	0.296	0.25	0.729	0.862	1.885	3.656
Biological Process	GO:0030154	5	cell differentiation	0.0050464	P02462	Collagen alpha-1(IV) chain	12.585	Up	0.0074763	COL4A1	7.3	160.61	38.958	27	8	5	1	1	0	11	8	6	2	1	2	7	7	6	0	0	0	4	5	4	1384800	707960	416020	14184000	16730000	8212900	0.213	0.101	0.173	2.054	2.137	1.938
Biological Process	GO:0030154	5	cell differentiation	0.0050464	P50281	Matrix metalloproteinase-14	6.248	Up	0.033159	MMP14	4.3	65.893	17.655	4	2	2	1	0	1	1	1	0	1	0	1	1	2	0	1	0	1	1	2	0	560520	0	338470	3749200	6850500	0	0.208		0.34	1.311	2.113
Biological Process	GO:0030154	5	cell differentiation	0.0050464	Q08629	Testican-1	66.774	Up	0.0048835	SPOCK1	40.1	49.124	139.54	49	15	15	0	1	1	13	24	10	2	5	2	13	15	13	2	5	2	13	15	13	781440	3773900	122840	48510000	200270000	59872000	0.016	0.071	0.006	0.934	3.4	1.876
Biological Process	GO:0030154	5	cell differentiation	0.0050464	O00339	Matrilin-2	5.582	Up	0.020144	MATN2	19	106.84	96.642	41	16	16	4	0	1	11	19	6	5	1	3	14	15	10	5	1	3	14	15	10	3198400	1689900	1925900	15212000	36530000	7126800	0.312	0.152	0.507	1.397	2.958	1.065
Biological Process	GO:0030154	5	cell differentiation	0.0050464	P46821	Microtubule-associated protein 1B	4.466	Up	0.0055964	MAP1B	7.3	270.63	51.578	50	15	14	9	7	4	15	12	3	11	9	7	13	13	6	10	8	6	12	12	5	1003200	1773700	510480	7764700	4346500	4583900	0.321	0.526	0.441	2.343	1.157	2.252
Biological Process	GO:0030154	5	cell differentiation	0.0050464	P02461	Collagen alpha-1(III) chain	18.249	Up	0.00135962	COL3A1	55.5	138.56	323.31	349	60	45	21	9	10	97	117	95	28	18	15	56	57	57	18	12	9	42	42	42	57554000	29731000	34116000	850330000	1397000000	817160000	0.115	0.055	0.184	1.609	2.332	2.519
Biological Process	GO:0030154	5	cell differentiation	0.0050464	P08572	Collagen alpha-2(IV) chain	62.4	Up	1.65779e-05	COL4A2	24.6	167.55	323.31	96	29	29	1	1	0	26	43	25	4	3	2	24	25	22	4	3	2	24	25	22	977530	882140	266530	42672000	70553000	37748000	0.041	0.035	0.029	1.68	2.451	2.421
Biological Process	GO:0030154	5	cell differentiation	0.0050464	Q16394	Exostosin-1	3.011	Up	0.014302	EXT1	4	86.254	4.0604	4	3	3	0	0	0	1	2	1	2	2	2	1	3	2	2	2	2	1	3	2	467150	251380	119070	932490	1693100	516750	0.751	0.374	0.519	1.413	2.262	1.275
Biological Process	GO:0030154	5	cell differentiation	0.0050464	Q99715	Collagen alpha-1(XII) chain	5.4	Up	0.0189392	COL12A1	37.2	333.14	323.31	395	92	91	31	24	37	103	106	94	54	37	56	81	86	81	53	36	55	80	85	80	15273000	8991000	14633000	112480000	98758000	99484000	0.28	0.152	0.723	1.94	1.503	2.794
Biological Process	GO:0030154	5	cell differentiation	0.0050464	P07093	Glia-derived nexin	11.771	Up	0.0067036	SERPINE2	46.2	44.002	169.23	127	17	17	12	5	6	33	47	24	12	9	9	16	16	14	12	9	9	16	16	14	132430000	37889000	41650000	871260000	2057200000	504660000	0.233	0.061	0.199	1.441	3.002	1.36
Biological Process	GO:0030154	5	cell differentiation	0.0050464	O00622	Protein CYR61	7.006	Up	0.027799	CYR61	27.3	42.026	33.987	23	8	8	3	2	2	8	5	3	5	2	3	7	6	5	5	2	3	7	6	5	7543100	2060100	876710	48582000	13641000	16819000	0.54	0.136	0.17	3.272	0.81	1.845
Biological Process	GO:0030154	5	cell differentiation	0.0050464	O43505	"Beta-1,4-glucuronyltransferase 1"	2.816	Up	0.024224	B4GAT1	8.4	47.119	4.6568	4	3	3	0	0	0	0	3	1	1	1	1	2	3	2	1	1	1	2	3	2	964920	2011500	1042400	5248800	5971000	3899800	0.323	0.623	0.942	1.654	1.66	2.002
Biological Process	GO:0030154	5	cell differentiation	0.0050464	Q96CG8	Collagen triple helix repeat-containing protein 1	20.075	Up	0.00065888	CTHRC1	34.2	26.224	67.085	21	7	7	3	0	0	5	7	6	4	3	2	7	7	5	4	3	2	7	7	5	5132900	5470900	1166300	105070000	144000000	32728000	0.112	0.111	0.069	2.158	2.609	1.095
Biological Process	GO:0030154	5	cell differentiation	0.0050464	P35579	Myosin-9	2.091	Up	0.042662	MYH9	33.2	226.53	323.31	219	57	45	38	21	11	44	74	31	41	36	21	48	55	43	33	30	19	38	45	35	14494000	8704600	4148000	18023000	38284000	14179000	0.949	0.527	0.732	1.111	2.082	1.424
Biological Process	GO:0030154	5	cell differentiation	0.0050464	P09382	Galectin-1	3.787	Up	0.00191859	LGALS1	64.4	14.716	282.85	94	8	8	15	18	8	17	19	17	7	8	6	8	8	8	7	8	6	8	8	8	273840000	282090000	69357000	724230000	1303200000	632750000	0.534	0.508	0.366	1.33	2.11	1.892
Biological Process	GO:0030154	5	cell differentiation	0.0050464	P08476	Inhibin beta A chain	24.045	Up	0.027082	INHBA	27.9	47.442	105.8	37	10	10	2	1	0	15	13	6	4	2	2	10	10	7	4	2	2	10	10	7	1176200	1032900	392470	51990000	22598000	5842500	0.091	0.074	0.081	3.776	1.448	0.691
Biological Process	GO:0030154	5	cell differentiation	0.0050464	P50454	Serpin H1	7.353	Up	0.0127612	SERPINH1	34.4	46.44	119.61	80	12	12	7	10	3	17	25	18	9	9	4	11	12	12	9	9	4	11	12	12	11074000	32089000	3548700	64210000	168460000	111280000	0.181	0.487	0.159	0.991	2.293	2.797
Biological Process	GO:0030154	5	cell differentiation	0.0050464	P62081	40S ribosomal protein S7	1.999	Up	0.039161	RPS7	11.3	22.127	7.5817	10	1	1	3	2	1	1	1	2	1	1	1	1	1	1	1	1	1	1	1	1	1194800	990110	493130	1619000	3003300	1871400	0.835	0.64	0.931	1.064	1.742	2.003
Biological Process	GO:0030154	5	cell differentiation	0.0050464	P19022	Cadherin-2	10.125	Up	0.020937	CDH2	12.1	99.808	74.261	38	9	9	1	5	0	15	10	7	2	4	0	8	9	5	2	4	0	8	9	5	710180	2890000	0	22514000	22758000	7325000	0.067	0.254		2.013	1.795	1.067
Biological Process	GO:0030154	5	cell differentiation	0.0050464	Q15063	Periostin	16.047	Up	0.031338	POSTN	48.9	93.313	323.31	109	31	13	0	15	1	22	42	29	5	23	5	28	31	28	1	10	1	11	13	11	1390500	63201000	1462900	154150000	583880000	255670000	0.009	0.353	0.023	0.877	2.931	2.37
Biological Process	GO:0030154	5	cell differentiation	0.0050464	P13611	Versican core protein	20.948	Up	0.00056156	VCAN	7	372.82	323.31	69	19	19	0	4	0	23	25	17	3	7	3	18	19	19	3	7	3	18	19	19	1128300	1425500	1067700	31270000	48598000	27155000	0.065	0.076	0.167	1.705	2.336	2.411
Biological Process	GO:0030154	5	cell differentiation	0.0050464	Q04760	Lactoylglutathione lyase	6.734	Up	0.00094414	GLO1	10.3	20.777	2.4412	4	2	2	0	1	1	1	0	1	1	1	1	2	2	2	1	1	1	2	2	2	1221200	701100	387730	5921500	7231400	5222500	0.378	0.2	0.323	1.727	1.86	2.48
Biological Process	GO:0030154	5	cell differentiation	0.0050464	P12109	Collagen alpha-1(VI) chain	26.254	Up	0.0053796	COL6A1	44.7	108.53	323.31	194	34	34	6	23	7	47	48	63	10	19	11	31	30	34	10	19	11	31	30	34	6479800	39144000	7500000	451200000	341550000	618780000	0.029	0.158	0.089	1.857	1.24	4.149
Biological Process	GO:0048762	8	mesenchymal cell differentiation	0.226888	O14786	Neuropilin-1	13.08	Up	0.0148198	NRP1	9.2	103.13	64.877	11	6	6	1	0	1	1	4	4	1	1	1	3	6	5	1	1	1	3	6	5	126450	248210	86880	757100	3121500	2859100	0.112	0.204	0.207	0.634	2.307	3.9
Biological Process	GO:0048762	8	mesenchymal cell differentiation	0.226888	Q9Y4K0	Lysyl oxidase homolog 2	97.971	Up	0.00178461	LOXL2	39.8	86.724	323.31	106	26	26	2	0	0	33	40	31	3	3	1	25	26	24	3	3	1	25	26	24	666620	5011100	1170400	194120000	312420000	232340000	0.005	0.039	0.026	1.57	2.229	3.059
Biological Process	GO:0045597	6	positive regulation of cell differentiation	0.00873603	O14786	Neuropilin-1	13.08	Up	0.0148198	NRP1	9.2	103.13	64.877	11	6	6	1	0	1	1	4	4	1	1	1	3	6	5	1	1	1	3	6	5	126450	248210	86880	757100	3121500	2859100	0.112	0.204	0.207	0.634	2.307	3.9
Biological Process	GO:0045597	6	positive regulation of cell differentiation	0.00873603	Q96CG8	Collagen triple helix repeat-containing protein 1	20.075	Up	0.00065888	CTHRC1	34.2	26.224	67.085	21	7	7	3	0	0	5	7	6	4	3	2	7	7	5	4	3	2	7	7	5	5132900	5470900	1166300	105070000	144000000	32728000	0.112	0.111	0.069	2.158	2.609	1.095
Biological Process	GO:0045597	6	positive regulation of cell differentiation	0.00873603	Q9Y4K0	Lysyl oxidase homolog 2	97.971	Up	0.00178461	LOXL2	39.8	86.724	323.31	106	26	26	2	0	0	33	40	31	3	3	1	25	26	24	3	3	1	25	26	24	666620	5011100	1170400	194120000	312420000	232340000	0.005	0.039	0.026	1.57	2.229	3.059
Biological Process	GO:0045597	6	positive regulation of cell differentiation	0.00873603	P35052	Glypican-1	6.895	Up	0.0086422	GPC1	12.9	61.68	23.613	12	5	5	0	0	0	4	3	5	2	1	1	4	5	4	2	1	1	4	5	4	724470	242550	240590	2585200	5283300	2729100	0.393	0.121	0.352	1.321	2.38	2.27
Biological Process	GO:0045597	6	positive regulation of cell differentiation	0.00873603	P36955	Pigment epithelium-derived factor	5.022	Up	0.042517	SERPINF1	31.1	46.312	90.643	59	13	9	6	4	5	13	17	14	5	6	5	11	12	12	1	2	1	7	8	8	24428000	22346000	22355000	75787000	187740000	197270000	0.296	0.25	0.729	0.862	1.885	3.656
Biological Process	GO:0045597	6	positive regulation of cell differentiation	0.00873603	P08476	Inhibin beta A chain	24.045	Up	0.027082	INHBA	27.9	47.442	105.8	37	10	10	2	1	0	15	13	6	4	2	2	10	10	7	4	2	2	10	10	7	1176200	1032900	392470	51990000	22598000	5842500	0.091	0.074	0.081	3.776	1.448	0.691
Biological Process	GO:0045597	6	positive regulation of cell differentiation	0.00873603	P50281	Matrix metalloproteinase-14	6.248	Up	0.033159	MMP14	4.3	65.893	17.655	4	2	2	1	0	1	1	1	0	1	0	1	1	2	0	1	0	1	1	2	0	560520	0	338470	3749200	6850500	0	0.208		0.34	1.311	2.113
Biological Process	GO:0045597	6	positive regulation of cell differentiation	0.00873603	P19022	Cadherin-2	10.125	Up	0.020937	CDH2	12.1	99.808	74.261	38	9	9	1	5	0	15	10	7	2	4	0	8	9	5	2	4	0	8	9	5	710180	2890000	0	22514000	22758000	7325000	0.067	0.254		2.013	1.795	1.067
Biological Process	GO:0045597	6	positive regulation of cell differentiation	0.00873603	P46821	Microtubule-associated protein 1B	4.466	Up	0.0055964	MAP1B	7.3	270.63	51.578	50	15	14	9	7	4	15	12	3	11	9	7	13	13	6	10	8	6	12	12	5	1003200	1773700	510480	7764700	4346500	4583900	0.321	0.526	0.441	2.343	1.157	2.252
Biological Process	GO:0045597	6	positive regulation of cell differentiation	0.00873603	P07093	Glia-derived nexin	11.771	Up	0.0067036	SERPINE2	46.2	44.002	169.23	127	17	17	12	5	6	33	47	24	12	9	9	16	16	14	12	9	9	16	16	14	132430000	37889000	41650000	871260000	2057200000	504660000	0.233	0.061	0.199	1.441	3.002	1.36
Biological Process	GO:0045597	6	positive regulation of cell differentiation	0.00873603	O00622	Protein CYR61	7.006	Up	0.027799	CYR61	27.3	42.026	33.987	23	8	8	3	2	2	8	5	3	5	2	3	7	6	5	5	2	3	7	6	5	7543100	2060100	876710	48582000	13641000	16819000	0.54	0.136	0.17	3.272	0.81	1.845
Biological Process	GO:0045595	5	regulation of cell differentiation	0.00664213	O14786	Neuropilin-1	13.08	Up	0.0148198	NRP1	9.2	103.13	64.877	11	6	6	1	0	1	1	4	4	1	1	1	3	6	5	1	1	1	3	6	5	126450	248210	86880	757100	3121500	2859100	0.112	0.204	0.207	0.634	2.307	3.9
Biological Process	GO:0045595	5	regulation of cell differentiation	0.00664213	Q9Y4K0	Lysyl oxidase homolog 2	97.971	Up	0.00178461	LOXL2	39.8	86.724	323.31	106	26	26	2	0	0	33	40	31	3	3	1	25	26	24	3	3	1	25	26	24	666620	5011100	1170400	194120000	312420000	232340000	0.005	0.039	0.026	1.57	2.229	3.059
Biological Process	GO:0045595	5	regulation of cell differentiation	0.00664213	P35052	Glypican-1	6.895	Up	0.0086422	GPC1	12.9	61.68	23.613	12	5	5	0	0	0	4	3	5	2	1	1	4	5	4	2	1	1	4	5	4	724470	242550	240590	2585200	5283300	2729100	0.393	0.121	0.352	1.321	2.38	2.27
Biological Process	GO:0045595	5	regulation of cell differentiation	0.00664213	P36955	Pigment epithelium-derived factor	5.022	Up	0.042517	SERPINF1	31.1	46.312	90.643	59	13	9	6	4	5	13	17	14	5	6	5	11	12	12	1	2	1	7	8	8	24428000	22346000	22355000	75787000	187740000	197270000	0.296	0.25	0.729	0.862	1.885	3.656
Biological Process	GO:0045595	5	regulation of cell differentiation	0.00664213	P50281	Matrix metalloproteinase-14	6.248	Up	0.033159	MMP14	4.3	65.893	17.655	4	2	2	1	0	1	1	1	0	1	0	1	1	2	0	1	0	1	1	2	0	560520	0	338470	3749200	6850500	0	0.208		0.34	1.311	2.113
Biological Process	GO:0045595	5	regulation of cell differentiation	0.00664213	Q08629	Testican-1	66.774	Up	0.0048835	SPOCK1	40.1	49.124	139.54	49	15	15	0	1	1	13	24	10	2	5	2	13	15	13	2	5	2	13	15	13	781440	3773900	122840	48510000	200270000	59872000	0.016	0.071	0.006	0.934	3.4	1.876
Biological Process	GO:0045595	5	regulation of cell differentiation	0.00664213	P46821	Microtubule-associated protein 1B	4.466	Up	0.0055964	MAP1B	7.3	270.63	51.578	50	15	14	9	7	4	15	12	3	11	9	7	13	13	6	10	8	6	12	12	5	1003200	1773700	510480	7764700	4346500	4583900	0.321	0.526	0.441	2.343	1.157	2.252
Biological Process	GO:0045595	5	regulation of cell differentiation	0.00664213	P02461	Collagen alpha-1(III) chain	18.249	Up	0.00135962	COL3A1	55.5	138.56	323.31	349	60	45	21	9	10	97	117	95	28	18	15	56	57	57	18	12	9	42	42	42	57554000	29731000	34116000	850330000	1397000000	817160000	0.115	0.055	0.184	1.609	2.332	2.519
Biological Process	GO:0045595	5	regulation of cell differentiation	0.00664213	P07093	Glia-derived nexin	11.771	Up	0.0067036	SERPINE2	46.2	44.002	169.23	127	17	17	12	5	6	33	47	24	12	9	9	16	16	14	12	9	9	16	16	14	132430000	37889000	41650000	871260000	2057200000	504660000	0.233	0.061	0.199	1.441	3.002	1.36
Biological Process	GO:0045595	5	regulation of cell differentiation	0.00664213	O00622	Protein CYR61	7.006	Up	0.027799	CYR61	27.3	42.026	33.987	23	8	8	3	2	2	8	5	3	5	2	3	7	6	5	5	2	3	7	6	5	7543100	2060100	876710	48582000	13641000	16819000	0.54	0.136	0.17	3.272	0.81	1.845
Biological Process	GO:0045595	5	regulation of cell differentiation	0.00664213	Q96CG8	Collagen triple helix repeat-containing protein 1	20.075	Up	0.00065888	CTHRC1	34.2	26.224	67.085	21	7	7	3	0	0	5	7	6	4	3	2	7	7	5	4	3	2	7	7	5	5132900	5470900	1166300	105070000	144000000	32728000	0.112	0.111	0.069	2.158	2.609	1.095
Biological Process	GO:0045595	5	regulation of cell differentiation	0.00664213	P09382	Galectin-1	3.787	Up	0.00191859	LGALS1	64.4	14.716	282.85	94	8	8	15	18	8	17	19	17	7	8	6	8	8	8	7	8	6	8	8	8	273840000	282090000	69357000	724230000	1303200000	632750000	0.534	0.508	0.366	1.33	2.11	1.892
Biological Process	GO:0045595	5	regulation of cell differentiation	0.00664213	P08476	Inhibin beta A chain	24.045	Up	0.027082	INHBA	27.9	47.442	105.8	37	10	10	2	1	0	15	13	6	4	2	2	10	10	7	4	2	2	10	10	7	1176200	1032900	392470	51990000	22598000	5842500	0.091	0.074	0.081	3.776	1.448	0.691
Biological Process	GO:0045595	5	regulation of cell differentiation	0.00664213	Q12805	EGF-containing fibulin-like extracellular matrix protein 1	5.953	Up	0.033317	EFEMP1	39.6	54.64	243.48	42	14	14	2	4	6	9	9	12	5	4	8	11	11	12	5	4	8	11	11	12	2917100	2877500	4660100	20180000	33838000	39672000	0.179	0.164	0.772	1.169	1.728	3.741
Biological Process	GO:0045595	5	regulation of cell differentiation	0.00664213	P19022	Cadherin-2	10.125	Up	0.020937	CDH2	12.1	99.808	74.261	38	9	9	1	5	0	15	10	7	2	4	0	8	9	5	2	4	0	8	9	5	710180	2890000	0	22514000	22758000	7325000	0.067	0.254		2.013	1.795	1.067
Biological Process	GO:0045595	5	regulation of cell differentiation	0.00664213	Q15063	Periostin	16.047	Up	0.031338	POSTN	48.9	93.313	323.31	109	31	13	0	15	1	22	42	29	5	23	5	28	31	28	1	10	1	11	13	11	1390500	63201000	1462900	154150000	583880000	255670000	0.009	0.353	0.023	0.877	2.931	2.37
Biological Process	GO:0000904	7	cell morphogenesis involved in differentiation	0.0410042	O43505	"Beta-1,4-glucuronyltransferase 1"	2.816	Up	0.024224	B4GAT1	8.4	47.119	4.6568	4	3	3	0	0	0	0	3	1	1	1	1	2	3	2	1	1	1	2	3	2	964920	2011500	1042400	5248800	5971000	3899800	0.323	0.623	0.942	1.654	1.66	2.002
Biological Process	GO:0000904	7	cell morphogenesis involved in differentiation	0.0410042	Q9BUD6	Spondin-2	184.242	Up	0.00041536	SPON2	36	35.846	228.89	60	10	10	0	1	0	18	26	15	3	3	2	10	10	9	3	3	2	10	10	9	2450400	2740400	2753300	531960000	1504000000	325430000	0.006	0.007	0.02	1.354	3.377	1.349
Biological Process	GO:0000904	7	cell morphogenesis involved in differentiation	0.0410042	Q16394	Exostosin-1	3.011	Up	0.014302	EXT1	4	86.254	4.0604	4	3	3	0	0	0	1	2	1	2	2	2	1	3	2	2	2	2	1	3	2	467150	251380	119070	932490	1693100	516750	0.751	0.374	0.519	1.413	2.262	1.275
Biological Process	GO:0000904	7	cell morphogenesis involved in differentiation	0.0410042	O14786	Neuropilin-1	13.08	Up	0.0148198	NRP1	9.2	103.13	64.877	11	6	6	1	0	1	1	4	4	1	1	1	3	6	5	1	1	1	3	6	5	126450	248210	86880	757100	3121500	2859100	0.112	0.204	0.207	0.634	2.307	3.9
Biological Process	GO:0000904	7	cell morphogenesis involved in differentiation	0.0410042	P35579	Myosin-9	2.091	Up	0.042662	MYH9	33.2	226.53	323.31	219	57	45	38	21	11	44	74	31	41	36	21	48	55	43	33	30	19	38	45	35	14494000	8704600	4148000	18023000	38284000	14179000	0.949	0.527	0.732	1.111	2.082	1.424
Biological Process	GO:0000904	7	cell morphogenesis involved in differentiation	0.0410042	P35052	Glypican-1	6.895	Up	0.0086422	GPC1	12.9	61.68	23.613	12	5	5	0	0	0	4	3	5	2	1	1	4	5	4	2	1	1	4	5	4	724470	242550	240590	2585200	5283300	2729100	0.393	0.121	0.352	1.321	2.38	2.27
Biological Process	GO:0000904	7	cell morphogenesis involved in differentiation	0.0410042	O00339	Matrilin-2	5.582	Up	0.020144	MATN2	19	106.84	96.642	41	16	16	4	0	1	11	19	6	5	1	3	14	15	10	5	1	3	14	15	10	3198400	1689900	1925900	15212000	36530000	7126800	0.312	0.152	0.507	1.397	2.958	1.065
Biological Process	GO:0000904	7	cell morphogenesis involved in differentiation	0.0410042	P46821	Microtubule-associated protein 1B	4.466	Up	0.0055964	MAP1B	7.3	270.63	51.578	50	15	14	9	7	4	15	12	3	11	9	7	13	13	6	10	8	6	12	12	5	1003200	1773700	510480	7764700	4346500	4583900	0.321	0.526	0.441	2.343	1.157	2.252
Biological Process	GO:0045596	6	negative regulation of cell differentiation	0.0546648	O14786	Neuropilin-1	13.08	Up	0.0148198	NRP1	9.2	103.13	64.877	11	6	6	1	0	1	1	4	4	1	1	1	3	6	5	1	1	1	3	6	5	126450	248210	86880	757100	3121500	2859100	0.112	0.204	0.207	0.634	2.307	3.9
Biological Process	GO:0045596	6	negative regulation of cell differentiation	0.0546648	Q15063	Periostin	16.047	Up	0.031338	POSTN	48.9	93.313	323.31	109	31	13	0	15	1	22	42	29	5	23	5	28	31	28	1	10	1	11	13	11	1390500	63201000	1462900	154150000	583880000	255670000	0.009	0.353	0.023	0.877	2.931	2.37
Biological Process	GO:0045596	6	negative regulation of cell differentiation	0.0546648	P09382	Galectin-1	3.787	Up	0.00191859	LGALS1	64.4	14.716	282.85	94	8	8	15	18	8	17	19	17	7	8	6	8	8	8	7	8	6	8	8	8	273840000	282090000	69357000	724230000	1303200000	632750000	0.534	0.508	0.366	1.33	2.11	1.892
Biological Process	GO:0045596	6	negative regulation of cell differentiation	0.0546648	P08476	Inhibin beta A chain	24.045	Up	0.027082	INHBA	27.9	47.442	105.8	37	10	10	2	1	0	15	13	6	4	2	2	10	10	7	4	2	2	10	10	7	1176200	1032900	392470	51990000	22598000	5842500	0.091	0.074	0.081	3.776	1.448	0.691
Biological Process	GO:0045596	6	negative regulation of cell differentiation	0.0546648	Q08629	Testican-1	66.774	Up	0.0048835	SPOCK1	40.1	49.124	139.54	49	15	15	0	1	1	13	24	10	2	5	2	13	15	13	2	5	2	13	15	13	781440	3773900	122840	48510000	200270000	59872000	0.016	0.071	0.006	0.934	3.4	1.876
Biological Process	GO:0045596	6	negative regulation of cell differentiation	0.0546648	Q12805	EGF-containing fibulin-like extracellular matrix protein 1	5.953	Up	0.033317	EFEMP1	39.6	54.64	243.48	42	14	14	2	4	6	9	9	12	5	4	8	11	11	12	5	4	8	11	11	12	2917100	2877500	4660100	20180000	33838000	39672000	0.179	0.164	0.772	1.169	1.728	3.741
Biological Process	GO:0045596	6	negative regulation of cell differentiation	0.0546648	P02461	Collagen alpha-1(III) chain	18.249	Up	0.00135962	COL3A1	55.5	138.56	323.31	349	60	45	21	9	10	97	117	95	28	18	15	56	57	57	18	12	9	42	42	42	57554000	29731000	34116000	850330000	1397000000	817160000	0.115	0.055	0.184	1.609	2.332	2.519

## Sheet: UP-response stress
GO Terms Level 1	GO Terms ID	GO Terms Level	GO Terms Description	Fisher's exact test P value	Protein accession	Protein description	Ratio	Regulated Type	P value	Gene name	Sequence coverage [%]	Mol. weight [kDa]	Score	MS/MS Counts	Peptides	Unique peptides	MS/MS Count E1	MS/MS Count E2	MS/MS Count E3	MS/MS Count M1	MS/MS Count M2	MS/MS Count M3	Peptides E1	Peptides E2	Peptides E3	Peptides M1	Peptides M2	Peptides M3	Unique peptides E1	Unique peptides E2	Unique peptides E3	Unique peptides M1	Unique peptides M2	Unique peptides M3	iBAQ E1	iBAQ E2	iBAQ E3	iBAQ M1	iBAQ M2	iBAQ M3	E1	E2	E3	M1	M2	M3
Biological Process	GO:0072593	4	reactive oxygen species metabolic process	0.243888	P04179	"Superoxide dismutase [Mn], mitochondrial"	2.098	Up	0.048243	SOD2	13.1	24.75	5.8097	10	3	3	1	1	1	2	2	3	2	1	1	3	3	3	2	1	1	3	3	3	14977000	22198000	4341500	24498000	36160000	30011000	0.726	0.995	0.568	1.118	1.455	2.229
Biological Process	GO:0072593	4	reactive oxygen species metabolic process	0.243888	O00622	Protein CYR61	7.006	Up	0.027799	CYR61	27.3	42.026	33.987	23	8	8	3	2	2	8	5	3	5	2	3	7	6	5	5	2	3	7	6	5	7543100	2060100	876710	48582000	13641000	16819000	0.54	0.136	0.17	3.272	0.81	1.845
Biological Process	GO:0006950	3	response to stress	7.76305e-06	P26022	Pentraxin-related protein PTX3	30.646	Up	0.040637	PTX3	57.2	41.975	302.54	122	19	19	0	11	0	44	25	42	1	11	0	18	15	18	1	11	0	18	15	18	5527300	88657000	0	1775300000	540030000	1244100000	0.009	0.119		2.442	0.655	2.787
Biological Process	GO:0006950	3	response to stress	7.76305e-06	P08123	Collagen alpha-2(I) chain	7.798	Up	0.025324	COL1A2	68.7	129.31	323.31	518	61	60	60	54	19	146	96	143	52	48	28	60	59	59	51	47	27	59	58	58	278620000	258050000	34024000	1623600000	685150000	1723900000	0.387	0.332	0.127	2.127	0.792	3.678
Biological Process	GO:0006950	3	response to stress	7.76305e-06	P08758	Annexin A5	2.726	Up	0.0091631	ANXA5	46.6	35.936	105.18	76	14	14	12	14	7	12	18	13	10	13	11	14	13	12	10	13	11	14	13	12	74821000	120100000	31328000	179380000	350450000	181030000	0.511	0.759	0.579	1.155	1.989	1.897
Biological Process	GO:0006950	3	response to stress	7.76305e-06	Q8NBS9	Thioredoxin domain-containing protein 5	4.783	Up	0.031601	TXNDC5	30.1	47.628	108.8	26	10	10	1	3	0	7	10	5	3	5	1	8	10	8	3	5	1	8	10	8	6365000	20289000	2062400	25377000	84857000	34197000	0.236	0.694	0.205	0.883	2.607	1.939
Biological Process	GO:0006950	3	response to stress	7.76305e-06	Q9Y4K0	Lysyl oxidase homolog 2	97.971	Up	0.00178461	LOXL2	39.8	86.724	323.31	106	26	26	2	0	0	33	40	31	3	3	1	25	26	24	3	3	1	25	26	24	666620	5011100	1170400	194120000	312420000	232340000	0.005	0.039	0.026	1.57	2.229	3.059
Biological Process	GO:0006950	3	response to stress	7.76305e-06	Q969H8	Myeloid-derived growth factor	6.651	Up	0.043878	MYDGF	24.9	18.795	41.03	12	3	3	0	0	0	3	5	4	1	2	1	3	3	3	1	2	1	3	3	3	1685700	7326800	159080	13437000	31893000	13028000	0.16	0.643	0.04	1.2	2.512	1.895
Biological Process	GO:0006950	3	response to stress	7.76305e-06	Q15121	Astrocytic phosphoprotein PEA-15	1.671	Up	0.003376	PEA15	36.9	15.04	86.468	25	4	4	3	8	4	4	3	3	3	3	3	4	3	3	3	3	3	4	3	3	41944000	42713000	13669000	76379000	83011000	37015000	0.911	0.859	0.801	1.563	1.498	1.234
Biological Process	GO:0006950	3	response to stress	7.76305e-06	P50281	Matrix metalloproteinase-14	6.248	Up	0.033159	MMP14	4.3	65.893	17.655	4	2	2	1	0	1	1	1	0	1	0	1	1	2	0	1	0	1	1	2	0	560520	0	338470	3749200	6850500	0	0.208		0.34	1.311	2.113
Biological Process	GO:0006950	3	response to stress	7.76305e-06	P02461	Collagen alpha-1(III) chain	18.249	Up	0.00135962	COL3A1	55.5	138.56	323.31	349	60	45	21	9	10	97	117	95	28	18	15	56	57	57	18	12	9	42	42	42	57554000	29731000	34116000	850330000	1397000000	817160000	0.115	0.055	0.184	1.609	2.332	2.519
Biological Process	GO:0006950	3	response to stress	7.76305e-06	P07093	Glia-derived nexin	11.771	Up	0.0067036	SERPINE2	46.2	44.002	169.23	127	17	17	12	5	6	33	47	24	12	9	9	16	16	14	12	9	9	16	16	14	132430000	37889000	41650000	871260000	2057200000	504660000	0.233	0.061	0.199	1.441	3.002	1.36
Biological Process	GO:0006950	3	response to stress	7.76305e-06	Q16881	"Thioredoxin reductase 1, cytoplasmic"	5.474	Up	0.0070556	TXNRD1	24.7	70.905	31.185	35	13	13	3	2	1	10	12	7	5	6	2	9	12	12	5	6	2	9	12	12	4329400	4333300	571590	15377000	22784000	13441000	0.456	0.422	0.161	1.525	1.992	2.17
Biological Process	GO:0006950	3	response to stress	7.76305e-06	O00622	Protein CYR61	7.006	Up	0.027799	CYR61	27.3	42.026	33.987	23	8	8	3	2	2	8	5	3	5	2	3	7	6	5	5	2	3	7	6	5	7543100	2060100	876710	48582000	13641000	16819000	0.54	0.136	0.17	3.272	0.81	1.845
Biological Process	GO:0006950	3	response to stress	7.76305e-06	P22692	Insulin-like growth factor-binding protein 4	17.813	Up	0.0086171	IGFBP4	38.8	27.934	98.133	67	9	9	4	6	3	15	20	19	6	5	5	8	8	9	6	5	5	8	8	9	36356000	28060000	17389000	217170000	582750000	818450000	0.137	0.098	0.176	0.77	1.824	4.727
Biological Process	GO:0006950	3	response to stress	7.76305e-06	Q9BWS9	Chitinase domain-containing protein 1	5.628	Up	0.030941	CHID1	10.9	44.94	6.8577	13	4	4	1	1	0	4	5	2	2	2	1	3	4	2	2	2	1	3	4	2	444990	1094500	78763	1613400	5598800	2096500	0.26	0.593	0.124	0.89	2.725	1.884
Biological Process	GO:0006950	3	response to stress	7.76305e-06	P19876	C-X-C motif chemokine 3	33.42	Up	0.0195594	CXCL3	45.8	11.342	59.848	12	4	3	0	1	0	2	3	6	1	2	1	4	4	4	1	2	1	3	3	3	1342600	519640	735400	17964000	11262000	66575000	0.088	0.032	0.13	1.101	0.609	6.645
Biological Process	GO:0006950	3	response to stress	7.76305e-06	P01011	Alpha-1-antichymotrypsin	35.455	Up	0.0063608	SERPINA3	24.3	47.65	56.947	29	8	8	0	0	0	10	11	8	1	2	0	7	8	6	1	2	0	7	8	6	898100	2182300	0	67754000	81907000	16008000	0.029	0.064		2.018	2.152	0.776
Biological Process	GO:0006950	3	response to stress	7.76305e-06	Q08380	Galectin-3-binding protein	10.088	Up	0.0074436	LGALS3BP	27.7	65.33	323.31	61	13	13	11	3	4	12	17	14	11	5	5	12	13	12	11	5	5	12	13	12	30155000	7127400	9388100	173850000	295390000	142210000	0.293	0.064	0.248	1.593	2.387	2.123
Biological Process	GO:0006950	3	response to stress	7.76305e-06	P35579	Myosin-9	2.091	Up	0.042662	MYH9	33.2	226.53	323.31	219	57	45	38	21	11	44	74	31	41	36	21	48	55	43	33	30	19	38	45	35	14494000	8704600	4148000	18023000	38284000	14179000	0.949	0.527	0.732	1.111	2.082	1.424
Biological Process	GO:0006950	3	response to stress	7.76305e-06	Q15084	Protein disulfide-isomerase A6	2.267	Up	0.047942	PDIA6	20.2	48.121	86.568	45	8	8	4	12	3	8	10	8	5	8	7	8	8	8	5	8	7	8	8	8	19592000	31476000	13219000	41858000	83223000	53922000	0.515	0.766	0.939	1.037	1.819	2.177
Biological Process	GO:0006950	3	response to stress	7.76305e-06	P24844	Myosin regulatory light polypeptide 9	3.29	Up	0.026878	MYL9	56.4	19.827	9.1428	6	8	2	1	1	0	2	2	0	7	6	5	7	8	4	1	2	1	2	2	0	1332300	3010100	608760	7647700	6530500	0	0.371	0.777	0.458	2.009	1.513
Biological Process	GO:0006950	3	response to stress	7.76305e-06	P08476	Inhibin beta A chain	24.045	Up	0.027082	INHBA	27.9	47.442	105.8	37	10	10	2	1	0	15	13	6	4	2	2	10	10	7	4	2	2	10	10	7	1176200	1032900	392470	51990000	22598000	5842500	0.091	0.074	0.081	3.776	1.448	0.691
Biological Process	GO:0006950	3	response to stress	7.76305e-06	Q9GZP0	Platelet-derived growth factor D	16.251	Up	0.0095559	PDGFD	13.2	42.848	9.1286	11	4	4	1	0	1	2	2	5	1	1	1	3	3	4	1	1	1	3	3	4	175330	1553700	111740	11601000	7599100	8976200	0.037	0.307	0.063	2.331	1.347	2.936
Biological Process	GO:0006950	3	response to stress	7.76305e-06	P50454	Serpin H1	7.353	Up	0.0127612	SERPINH1	34.4	46.44	119.61	80	12	12	7	10	3	17	25	18	9	9	4	11	12	12	9	9	4	11	12	12	11074000	32089000	3548700	64210000	168460000	111280000	0.181	0.487	0.159	0.991	2.293	2.797
Biological Process	GO:0006950	3	response to stress	7.76305e-06	P01024	Complement C3	63.787	Up	0.044438	C3	35.5	187.15	289.83	92	48	39	0	0	0	26	18	48	12	9	10	36	32	47	3	0	1	27	23	38	224670	0	216400	11599000	4975900	41408000	0.02		0.055	0.998	0.378	5.8
Biological Process	GO:0006950	3	response to stress	7.76305e-06	P01033	Metalloproteinase inhibitor 1	25.345	Up	0.0029956	TIMP1	45.4	23.171	295.74	105	7	7	7	8	7	23	36	24	6	5	7	7	7	7	6	5	7	7	7	7	123160000	233850000	201930000	5162900000	14404000000	3598700000	0.033	0.058	0.147	1.313	3.23	1.489
Biological Process	GO:0006950	3	response to stress	7.76305e-06	P05121	Plasminogen activator inhibitor 1	2.572	Up	0.0112754	SERPINE1	49.3	45.059	323.31	290	20	20	41	44	24	75	56	50	18	19	18	20	20	19	18	19	18	20	20	19	696760000	1081900000	342880000	3286900000	2170100000	1205400000	0.508	0.73	0.674	2.256	1.314	1.347
Biological Process	GO:0006950	3	response to stress	7.76305e-06	Q02809	"Procollagen-lysine,2-oxoglutarate 5-dioxygenase 1"	3.684	Up	0.04362	PLOD1	38.2	83.549	276.84	99	21	21	10	5	12	23	32	17	12	10	12	17	19	14	12	10	12	17	19	14	14391000	5674600	10597000	59613000	91870000	29502000	0.435	0.159	0.865	1.698	2.309	1.368
Biological Process	GO:0006950	3	response to stress	7.76305e-06	P04179	"Superoxide dismutase [Mn], mitochondrial"	2.098	Up	0.048243	SOD2	13.1	24.75	5.8097	10	3	3	1	1	1	2	2	3	2	1	1	3	3	3	2	1	1	3	3	3	14977000	22198000	4341500	24498000	36160000	30011000	0.726	0.995	0.568	1.118	1.455	2.229
Biological Process	GO:0006950	3	response to stress	7.76305e-06	P07585	Decorin	45.345	Up	0.0174386	DCN	30.1	39.746	232.11	46	10	9	1	2	5	6	20	12	2	5	9	9	10	10	2	4	8	8	9	9	3435200	21371000	21981000	284750000	2299500000	1033400000	0.006	0.035	0.104	0.468	3.338	2.769
Biological Process	GO:0006950	3	response to stress	7.76305e-06	Q9BUD6	Spondin-2	184.242	Up	0.00041536	SPON2	36	35.846	228.89	60	10	10	0	1	0	18	26	15	3	3	2	10	10	9	3	3	2	10	10	9	2450400	2740400	2753300	531960000	1504000000	325430000	0.006	0.007	0.02	1.354	3.377	1.349
Biological Process	GO:0006950	3	response to stress	7.76305e-06	O14786	Neuropilin-1	13.08	Up	0.0148198	NRP1	9.2	103.13	64.877	11	6	6	1	0	1	1	4	4	1	1	1	3	6	5	1	1	1	3	6	5	126450	248210	86880	757100	3121500	2859100	0.112	0.204	0.207	0.634	2.307	3.9
Biological Process	GO:0006950	3	response to stress	7.76305e-06	P35237	Serpin B6	1.819	Up	0.0041002	SERPINB6	13	42.621	9.071	16	4	4	1	2	1	4	5	3	3	2	1	4	4	4	3	2	1	4	4	4	3154100	3287900	925700	4971500	6212100	3890300	0.9	0.868	0.712	1.336	1.473	1.702
Biological Process	GO:0006950	3	response to stress	7.76305e-06	O00339	Matrilin-2	5.582	Up	0.020144	MATN2	19	106.84	96.642	41	16	16	4	0	1	11	19	6	5	1	3	14	15	10	5	1	3	14	15	10	3198400	1689900	1925900	15212000	36530000	7126800	0.312	0.152	0.507	1.397	2.958	1.065
Biological Process	GO:0006950	3	response to stress	7.76305e-06	P78539	Sushi repeat-containing protein SRPX	27.971	Up	0.027542	SRPX	27.6	51.571	48.838	24	12	12	0	0	0	5	6	13	1	3	1	8	10	11	1	3	1	8	10	11	107670	963960	1391300	21900000	26418000	58346000	0.006	0.052	0.219	1.21	1.288	5.25
Biological Process	GO:0006950	3	response to stress	7.76305e-06	Q14019	Coactosin-like protein	1.998	Up	0.023938	COTL1	44.4	15.945	61.45	21	6	6	3	3	3	5	5	2	3	3	3	4	5	6	3	3	3	4	5	6	28867000	45927000	8779700	57346000	71415000	49940000	0.704	1.038	0.579	1.319	1.449	1.869
Biological Process	GO:0006950	3	response to stress	7.76305e-06	P09382	Galectin-1	3.787	Up	0.00191859	LGALS1	64.4	14.716	282.85	94	8	8	15	18	8	17	19	17	7	8	6	8	8	8	7	8	6	8	8	8	273840000	282090000	69357000	724230000	1303200000	632750000	0.534	0.508	0.366	1.33	2.11	1.892
Biological Process	GO:0006950	3	response to stress	7.76305e-06	Q16270	Insulin-like growth factor-binding protein 7	5.991	Up	0.028475	IGFBP7	44.7	29.13	227.15	66	11	11	11	5	5	23	10	12	11	6	5	11	9	10	11	6	5	11	9	10	177140000	34606000	25566000	954020000	395400000	287500000	0.605	0.11	0.236	3.069	1.122	1.506
Biological Process	GO:0006950	3	response to stress	7.76305e-06	P15104	Glutamine synthetase	2.042	Up	0.039323	GLUL	17.4	42.064	27.278	22	5	5	2	4	2	4	6	4	2	2	2	4	5	4	2	2	2	4	5	4	2199100	3483100	1714300	7512500	6435700	5277300	0.529	0.775	1.112	1.702	1.285	1.946
Biological Process	GO:0006950	3	response to stress	7.76305e-06	Q15063	Periostin	16.047	Up	0.031338	POSTN	48.9	93.313	323.31	109	31	13	0	15	1	22	42	29	5	23	5	28	31	28	1	10	1	11	13	11	1390500	63201000	1462900	154150000	583880000	255670000	0.009	0.353	0.023	0.877	2.931	2.37
Biological Process	GO:0006950	3	response to stress	7.76305e-06	P13667	Protein disulfide-isomerase A4	2.411	Up	0.023441	PDIA4	30.4	72.932	61.725	55	16	16	3	8	6	10	17	11	8	13	8	15	15	14	8	13	8	15	15	14	13120000	25378000	5279300	30882000	49790000	33985000	0.53	0.949	0.576	1.176	1.672	2.106
Biological Process	GO:0006950	3	response to stress	7.76305e-06	O00469	"Procollagen-lysine,2-oxoglutarate 5-dioxygenase 2"	34.657	Up	0.0033234	PLOD2	29.4	84.685	99.55	54	20	20	0	1	0	15	28	10	3	5	4	17	20	14	3	5	4	17	20	14	481590	1918000	721080	49166000	91338000	14864000	0.019	0.072	0.078	1.87	3.066	0.921
Biological Process	GO:0006950	3	response to stress	7.76305e-06	Q9UNN8	Endothelial protein C receptor	4.576	Up	0.026459	PROCR	3.8	26.671	1.5589	2	1	1	0	0	0	1	1	0	1	1	1	1	1	1	1	1	1	1	1	1	669160	1232300	170330	3702900	4083400	2281000	0.353	0.601	0.242	1.839	1.789	1.845
Biological Process	GO:0007568	4	aging	0.00539851	Q9Y4K0	Lysyl oxidase homolog 2	97.971	Up	0.00178461	LOXL2	39.8	86.724	323.31	106	26	26	2	0	0	33	40	31	3	3	1	25	26	24	3	3	1	25	26	24	666620	5011100	1170400	194120000	312420000	232340000	0.005	0.039	0.026	1.57	2.229	3.059
Biological Process	GO:0007568	4	aging	0.00539851	P01033	Metalloproteinase inhibitor 1	25.345	Up	0.0029956	TIMP1	45.4	23.171	295.74	105	7	7	7	8	7	23	36	24	6	5	7	7	7	7	6	5	7	7	7	7	123160000	233850000	201930000	5162900000	14404000000	3598700000	0.033	0.058	0.147	1.313	3.23	1.489
Biological Process	GO:0007568	4	aging	0.00539851	P05121	Plasminogen activator inhibitor 1	2.572	Up	0.0112754	SERPINE1	49.3	45.059	323.31	290	20	20	41	44	24	75	56	50	18	19	18	20	20	19	18	19	18	20	20	19	696760000	1081900000	342880000	3286900000	2170100000	1205400000	0.508	0.73	0.674	2.256	1.314	1.347
Biological Process	GO:0007568	4	aging	0.00539851	P36955	Pigment epithelium-derived factor	5.022	Up	0.042517	SERPINF1	31.1	46.312	90.643	59	13	9	6	4	5	13	17	14	5	6	5	11	12	12	1	2	1	7	8	8	24428000	22346000	22355000	75787000	187740000	197270000	0.296	0.25	0.729	0.862	1.885	3.656
Biological Process	GO:0007568	4	aging	0.00539851	P04179	"Superoxide dismutase [Mn], mitochondrial"	2.098	Up	0.048243	SOD2	13.1	24.75	5.8097	10	3	3	1	1	1	2	2	3	2	1	1	3	3	3	2	1	1	3	3	3	14977000	22198000	4341500	24498000	36160000	30011000	0.726	0.995	0.568	1.118	1.455	2.229
Biological Process	GO:0007568	4	aging	0.00539851	P07585	Decorin	45.345	Up	0.0174386	DCN	30.1	39.746	232.11	46	10	9	1	2	5	6	20	12	2	5	9	9	10	10	2	4	8	8	9	9	3435200	21371000	21981000	284750000	2299500000	1033400000	0.006	0.035	0.104	0.468	3.338	2.769
Biological Process	GO:0007568	4	aging	0.00539851	P02461	Collagen alpha-1(III) chain	18.249	Up	0.00135962	COL3A1	55.5	138.56	323.31	349	60	45	21	9	10	97	117	95	28	18	15	56	57	57	18	12	9	42	42	42	57554000	29731000	34116000	850330000	1397000000	817160000	0.115	0.055	0.184	1.609	2.332	2.519
Biological Process	GO:0031348	7	negative regulation of defense response	0.0653837	Q9BWS9	Chitinase domain-containing protein 1	5.628	Up	0.030941	CHID1	10.9	44.94	6.8577	13	4	4	1	1	0	4	5	2	2	2	1	3	4	2	2	2	1	3	4	2	444990	1094500	78763	1613400	5598800	2096500	0.26	0.593	0.124	0.89	2.725	1.884
Biological Process	GO:0031348	7	negative regulation of defense response	0.0653837	Q92743	Serine protease HTRA1	142.747	Up	0.0025383	HTRA1	30.8	51.286	73.421	38	11	11	1	0	0	10	17	10	1	0	2	11	11	9	1	0	2	11	11	9	228840	0	294860	62973000	116070000	46017000	0.005		0.02	1.403	2.281	1.669
Biological Process	GO:0031348	7	negative regulation of defense response	0.0653837	P36955	Pigment epithelium-derived factor	5.022	Up	0.042517	SERPINF1	31.1	46.312	90.643	59	13	9	6	4	5	13	17	14	5	6	5	11	12	12	1	2	1	7	8	8	24428000	22346000	22355000	75787000	187740000	197270000	0.296	0.25	0.729	0.862	1.885	3.656

## Sheet: UP-locomotion
GO Terms Level 1	GO Terms ID	GO Terms Level	GO Terms Description	Fisher's exact test P value	Protein accession	Protein description	Ratio	Regulated Type	P value	Gene name	Sequence coverage [%]	Mol. weight [kDa]	Score	MS/MS Counts	Peptides	Unique peptides	MS/MS Count E1	MS/MS Count E2	MS/MS Count E3	MS/MS Count M1	MS/MS Count M2	MS/MS Count M3	Peptides E1	Peptides E2	Peptides E3	Peptides M1	Peptides M2	Peptides M3	Unique peptides E1	Unique peptides E2	Unique peptides E3	Unique peptides M1	Unique peptides M2	Unique peptides M3	iBAQ E1	iBAQ E2	iBAQ E3	iBAQ M1	iBAQ M2	iBAQ M3	E1	E2	E3	M1	M2	M3
Biological Process	GO:0030336	8	negative regulation of cell migration	0.0283765	P01033	Metalloproteinase inhibitor 1	25.345	Up	0.0029956	TIMP1	45.4	23.171	295.74	105	7	7	7	8	7	23	36	24	6	5	7	7	7	7	6	5	7	7	7	7	123160000	233850000	201930000	5162900000	14404000000	3598700000	0.033	0.058	0.147	1.313	3.23	1.489
Biological Process	GO:0030336	8	negative regulation of cell migration	0.0283765	P05121	Plasminogen activator inhibitor 1	2.572	Up	0.0112754	SERPINE1	49.3	45.059	323.31	290	20	20	41	44	24	75	56	50	18	19	18	20	20	19	18	19	18	20	20	19	696760000	1081900000	342880000	3286900000	2170100000	1205400000	0.508	0.73	0.674	2.256	1.314	1.347
Biological Process	GO:0030336	8	negative regulation of cell migration	0.0283765	P36955	Pigment epithelium-derived factor	5.022	Up	0.042517	SERPINF1	31.1	46.312	90.643	59	13	9	6	4	5	13	17	14	5	6	5	11	12	12	1	2	1	7	8	8	24428000	22346000	22355000	75787000	187740000	197270000	0.296	0.25	0.729	0.862	1.885	3.656
Biological Process	GO:0030336	8	negative regulation of cell migration	0.0283765	P07585	Decorin	45.345	Up	0.0174386	DCN	30.1	39.746	232.11	46	10	9	1	2	5	6	20	12	2	5	9	9	10	10	2	4	8	8	9	9	3435200	21371000	21981000	284750000	2299500000	1033400000	0.006	0.035	0.104	0.468	3.338	2.769
Biological Process	GO:0030336	8	negative regulation of cell migration	0.0283765	P02461	Collagen alpha-1(III) chain	18.249	Up	0.00135962	COL3A1	55.5	138.56	323.31	349	60	45	21	9	10	97	117	95	28	18	15	56	57	57	18	12	9	42	42	42	57554000	29731000	34116000	850330000	1397000000	817160000	0.115	0.055	0.184	1.609	2.332	2.519
Biological Process	GO:0010634	9	positive regulation of epithelial cell migration	0.176666	O60687	Sushi repeat-containing protein SRPX2	19.744	Up	0.039323	SRPX2	33.8	52.971	82.027	42	12	12	1	0	0	13	17	11	4	2	1	12	12	12	4	2	1	12	12	12	5990700	596270	391460	51851000	62309000	32087000	0.251	0.023	0.043	2.04	2.163	2.056
Biological Process	GO:0010634	9	positive regulation of epithelial cell migration	0.176666	O14786	Neuropilin-1	13.08	Up	0.0148198	NRP1	9.2	103.13	64.877	11	6	6	1	0	1	1	4	4	1	1	1	3	6	5	1	1	1	3	6	5	126450	248210	86880	757100	3121500	2859100	0.112	0.204	0.207	0.634	2.307	3.9
Biological Process	GO:0090132	5	epithelium migration	0.0271374	O14786	Neuropilin-1	13.08	Up	0.0148198	NRP1	9.2	103.13	64.877	11	6	6	1	0	1	1	4	4	1	1	1	3	6	5	1	1	1	3	6	5	126450	248210	86880	757100	3121500	2859100	0.112	0.204	0.207	0.634	2.307	3.9
Biological Process	GO:0090132	5	epithelium migration	0.0271374	Q9Y4K0	Lysyl oxidase homolog 2	97.971	Up	0.00178461	LOXL2	39.8	86.724	323.31	106	26	26	2	0	0	33	40	31	3	3	1	25	26	24	3	3	1	25	26	24	666620	5011100	1170400	194120000	312420000	232340000	0.005	0.039	0.026	1.57	2.229	3.059
Biological Process	GO:0090132	5	epithelium migration	0.0271374	P35579	Myosin-9	2.091	Up	0.042662	MYH9	33.2	226.53	323.31	219	57	45	38	21	11	44	74	31	41	36	21	48	55	43	33	30	19	38	45	35	14494000	8704600	4148000	18023000	38284000	14179000	0.949	0.527	0.732	1.111	2.082	1.424
Biological Process	GO:0010596	10	negative regulation of endothelial cell migration	0.0588233	P36955	Pigment epithelium-derived factor	5.022	Up	0.042517	SERPINF1	31.1	46.312	90.643	59	13	9	6	4	5	13	17	14	5	6	5	11	12	12	1	2	1	7	8	8	24428000	22346000	22355000	75787000	187740000	197270000	0.296	0.25	0.729	0.862	1.885	3.656
Biological Process	GO:0010596	10	negative regulation of endothelial cell migration	0.0588233	P07585	Decorin	45.345	Up	0.0174386	DCN	30.1	39.746	232.11	46	10	9	1	2	5	6	20	12	2	5	9	9	10	10	2	4	8	8	9	9	3435200	21371000	21981000	284750000	2299500000	1033400000	0.006	0.035	0.104	0.468	3.338	2.769
Biological Process	GO:2000145	6	regulation of cell motility	0.00681266	P19876	C-X-C motif chemokine 3	33.42	Up	0.0195594	CXCL3	45.8	11.342	59.848	12	4	3	0	1	0	2	3	6	1	2	1	4	4	4	1	2	1	3	3	3	1342600	519640	735400	17964000	11262000	66575000	0.088	0.032	0.13	1.101	0.609	6.645
Biological Process	GO:2000145	6	regulation of cell motility	0.00681266	O60687	Sushi repeat-containing protein SRPX2	19.744	Up	0.039323	SRPX2	33.8	52.971	82.027	42	12	12	1	0	0	13	17	11	4	2	1	12	12	12	4	2	1	12	12	12	5990700	596270	391460	51851000	62309000	32087000	0.251	0.023	0.043	2.04	2.163	2.056
Biological Process	GO:2000145	6	regulation of cell motility	0.00681266	O14786	Neuropilin-1	13.08	Up	0.0148198	NRP1	9.2	103.13	64.877	11	6	6	1	0	1	1	4	4	1	1	1	3	6	5	1	1	1	3	6	5	126450	248210	86880	757100	3121500	2859100	0.112	0.204	0.207	0.634	2.307	3.9
Biological Process	GO:2000145	6	regulation of cell motility	0.00681266	P36955	Pigment epithelium-derived factor	5.022	Up	0.042517	SERPINF1	31.1	46.312	90.643	59	13	9	6	4	5	13	17	14	5	6	5	11	12	12	1	2	1	7	8	8	24428000	22346000	22355000	75787000	187740000	197270000	0.296	0.25	0.729	0.862	1.885	3.656
Biological Process	GO:2000145	6	regulation of cell motility	0.00681266	Q9GZP0	Platelet-derived growth factor D	16.251	Up	0.0095559	PDGFD	13.2	42.848	9.1286	11	4	4	1	0	1	2	2	5	1	1	1	3	3	4	1	1	1	3	3	4	175330	1553700	111740	11601000	7599100	8976200	0.037	0.307	0.063	2.331	1.347	2.936
Biological Process	GO:2000145	6	regulation of cell motility	0.00681266	P50281	Matrix metalloproteinase-14	6.248	Up	0.033159	MMP14	4.3	65.893	17.655	4	2	2	1	0	1	1	1	0	1	0	1	1	2	0	1	0	1	1	2	0	560520	0	338470	3749200	6850500	0	0.208		0.34	1.311	2.113
Biological Process	GO:2000145	6	regulation of cell motility	0.00681266	P02461	Collagen alpha-1(III) chain	18.249	Up	0.00135962	COL3A1	55.5	138.56	323.31	349	60	45	21	9	10	97	117	95	28	18	15	56	57	57	18	12	9	42	42	42	57554000	29731000	34116000	850330000	1397000000	817160000	0.115	0.055	0.184	1.609	2.332	2.519
Biological Process	GO:2000145	6	regulation of cell motility	0.00681266	Q15063	Periostin	16.047	Up	0.031338	POSTN	48.9	93.313	323.31	109	31	13	0	15	1	22	42	29	5	23	5	28	31	28	1	10	1	11	13	11	1390500	63201000	1462900	154150000	583880000	255670000	0.009	0.353	0.023	0.877	2.931	2.37
Biological Process	GO:2000145	6	regulation of cell motility	0.00681266	P05121	Plasminogen activator inhibitor 1	2.572	Up	0.0112754	SERPINE1	49.3	45.059	323.31	290	20	20	41	44	24	75	56	50	18	19	18	20	20	19	18	19	18	20	20	19	696760000	1081900000	342880000	3286900000	2170100000	1205400000	0.508	0.73	0.674	2.256	1.314	1.347
Biological Process	GO:2000145	6	regulation of cell motility	0.00681266	P01033	Metalloproteinase inhibitor 1	25.345	Up	0.0029956	TIMP1	45.4	23.171	295.74	105	7	7	7	8	7	23	36	24	6	5	7	7	7	7	6	5	7	7	7	7	123160000	233850000	201930000	5162900000	14404000000	3598700000	0.033	0.058	0.147	1.313	3.23	1.489
Biological Process	GO:2000145	6	regulation of cell motility	0.00681266	P07093	Glia-derived nexin	11.771	Up	0.0067036	SERPINE2	46.2	44.002	169.23	127	17	17	12	5	6	33	47	24	12	9	9	16	16	14	12	9	9	16	16	14	132430000	37889000	41650000	871260000	2057200000	504660000	0.233	0.061	0.199	1.441	3.002	1.36
Biological Process	GO:2000145	6	regulation of cell motility	0.00681266	O00622	Protein CYR61	7.006	Up	0.027799	CYR61	27.3	42.026	33.987	23	8	8	3	2	2	8	5	3	5	2	3	7	6	5	5	2	3	7	6	5	7543100	2060100	876710	48582000	13641000	16819000	0.54	0.136	0.17	3.272	0.81	1.845
Biological Process	GO:2000145	6	regulation of cell motility	0.00681266	P07585	Decorin	45.345	Up	0.0174386	DCN	30.1	39.746	232.11	46	10	9	1	2	5	6	20	12	2	5	9	9	10	10	2	4	8	8	9	9	3435200	21371000	21981000	284750000	2299500000	1033400000	0.006	0.035	0.104	0.468	3.338	2.769
Biological Process	GO:0051270	5	regulation of cellular component movement	0.0136258	P19876	C-X-C motif chemokine 3	33.42	Up	0.0195594	CXCL3	45.8	11.342	59.848	12	4	3	0	1	0	2	3	6	1	2	1	4	4	4	1	2	1	3	3	3	1342600	519640	735400	17964000	11262000	66575000	0.088	0.032	0.13	1.101	0.609	6.645
Biological Process	GO:0051270	5	regulation of cellular component movement	0.0136258	O60687	Sushi repeat-containing protein SRPX2	19.744	Up	0.039323	SRPX2	33.8	52.971	82.027	42	12	12	1	0	0	13	17	11	4	2	1	12	12	12	4	2	1	12	12	12	5990700	596270	391460	51851000	62309000	32087000	0.251	0.023	0.043	2.04	2.163	2.056
Biological Process	GO:0051270	5	regulation of cellular component movement	0.0136258	O14786	Neuropilin-1	13.08	Up	0.0148198	NRP1	9.2	103.13	64.877	11	6	6	1	0	1	1	4	4	1	1	1	3	6	5	1	1	1	3	6	5	126450	248210	86880	757100	3121500	2859100	0.112	0.204	0.207	0.634	2.307	3.9
Biological Process	GO:0051270	5	regulation of cellular component movement	0.0136258	P36955	Pigment epithelium-derived factor	5.022	Up	0.042517	SERPINF1	31.1	46.312	90.643	59	13	9	6	4	5	13	17	14	5	6	5	11	12	12	1	2	1	7	8	8	24428000	22346000	22355000	75787000	187740000	197270000	0.296	0.25	0.729	0.862	1.885	3.656
Biological Process	GO:0051270	5	regulation of cellular component movement	0.0136258	Q9GZP0	Platelet-derived growth factor D	16.251	Up	0.0095559	PDGFD	13.2	42.848	9.1286	11	4	4	1	0	1	2	2	5	1	1	1	3	3	4	1	1	1	3	3	4	175330	1553700	111740	11601000	7599100	8976200	0.037	0.307	0.063	2.331	1.347	2.936
Biological Process	GO:0051270	5	regulation of cellular component movement	0.0136258	P50281	Matrix metalloproteinase-14	6.248	Up	0.033159	MMP14	4.3	65.893	17.655	4	2	2	1	0	1	1	1	0	1	0	1	1	2	0	1	0	1	1	2	0	560520	0	338470	3749200	6850500	0	0.208		0.34	1.311	2.113
Biological Process	GO:0051270	5	regulation of cellular component movement	0.0136258	P02461	Collagen alpha-1(III) chain	18.249	Up	0.00135962	COL3A1	55.5	138.56	323.31	349	60	45	21	9	10	97	117	95	28	18	15	56	57	57	18	12	9	42	42	42	57554000	29731000	34116000	850330000	1397000000	817160000	0.115	0.055	0.184	1.609	2.332	2.519
Biological Process	GO:0051270	5	regulation of cellular component movement	0.0136258	Q15063	Periostin	16.047	Up	0.031338	POSTN	48.9	93.313	323.31	109	31	13	0	15	1	22	42	29	5	23	5	28	31	28	1	10	1	11	13	11	1390500	63201000	1462900	154150000	583880000	255670000	0.009	0.353	0.023	0.877	2.931	2.37
Biological Process	GO:0051270	5	regulation of cellular component movement	0.0136258	P05121	Plasminogen activator inhibitor 1	2.572	Up	0.0112754	SERPINE1	49.3	45.059	323.31	290	20	20	41	44	24	75	56	50	18	19	18	20	20	19	18	19	18	20	20	19	696760000	1081900000	342880000	3286900000	2170100000	1205400000	0.508	0.73	0.674	2.256	1.314	1.347
Biological Process	GO:0051270	5	regulation of cellular component movement	0.0136258	P01033	Metalloproteinase inhibitor 1	25.345	Up	0.0029956	TIMP1	45.4	23.171	295.74	105	7	7	7	8	7	23	36	24	6	5	7	7	7	7	6	5	7	7	7	7	123160000	233850000	201930000	5162900000	14404000000	3598700000	0.033	0.058	0.147	1.313	3.23	1.489
Biological Process	GO:0051270	5	regulation of cellular component movement	0.0136258	P07093	Glia-derived nexin	11.771	Up	0.0067036	SERPINE2	46.2	44.002	169.23	127	17	17	12	5	6	33	47	24	12	9	9	16	16	14	12	9	9	16	16	14	132430000	37889000	41650000	871260000	2057200000	504660000	0.233	0.061	0.199	1.441	3.002	1.36
Biological Process	GO:0051270	5	regulation of cellular component movement	0.0136258	O00622	Protein CYR61	7.006	Up	0.027799	CYR61	27.3	42.026	33.987	23	8	8	3	2	2	8	5	3	5	2	3	7	6	5	5	2	3	7	6	5	7543100	2060100	876710	48582000	13641000	16819000	0.54	0.136	0.17	3.272	0.81	1.845
Biological Process	GO:0051270	5	regulation of cellular component movement	0.0136258	P07585	Decorin	45.345	Up	0.0174386	DCN	30.1	39.746	232.11	46	10	9	1	2	5	6	20	12	2	5	9	9	10	10	2	4	8	8	9	9	3435200	21371000	21981000	284750000	2299500000	1033400000	0.006	0.035	0.104	0.468	3.338	2.769
Biological Process	GO:0048870	5	cell motility	0.000388425	P19876	C-X-C motif chemokine 3	33.42	Up	0.0195594	CXCL3	45.8	11.342	59.848	12	4	3	0	1	0	2	3	6	1	2	1	4	4	4	1	2	1	3	3	3	1342600	519640	735400	17964000	11262000	66575000	0.088	0.032	0.13	1.101	0.609	6.645
Biological Process	GO:0048870	5	cell motility	0.000388425	O60687	Sushi repeat-containing protein SRPX2	19.744	Up	0.039323	SRPX2	33.8	52.971	82.027	42	12	12	1	0	0	13	17	11	4	2	1	12	12	12	4	2	1	12	12	12	5990700	596270	391460	51851000	62309000	32087000	0.251	0.023	0.043	2.04	2.163	2.056
Biological Process	GO:0048870	5	cell motility	0.000388425	P08123	Collagen alpha-2(I) chain	7.798	Up	0.025324	COL1A2	68.7	129.31	323.31	518	61	60	60	54	19	146	96	143	52	48	28	60	59	59	51	47	27	59	58	58	278620000	258050000	34024000	1623600000	685150000	1723900000	0.387	0.332	0.127	2.127	0.792	3.678
Biological Process	GO:0048870	5	cell motility	0.000388425	O14786	Neuropilin-1	13.08	Up	0.0148198	NRP1	9.2	103.13	64.877	11	6	6	1	0	1	1	4	4	1	1	1	3	6	5	1	1	1	3	6	5	126450	248210	86880	757100	3121500	2859100	0.112	0.204	0.207	0.634	2.307	3.9
Biological Process	GO:0048870	5	cell motility	0.000388425	Q96CG8	Collagen triple helix repeat-containing protein 1	20.075	Up	0.00065888	CTHRC1	34.2	26.224	67.085	21	7	7	3	0	0	5	7	6	4	3	2	7	7	5	4	3	2	7	7	5	5132900	5470900	1166300	105070000	144000000	32728000	0.112	0.111	0.069	2.158	2.609	1.095
Biological Process	GO:0048870	5	cell motility	0.000388425	Q9Y4K0	Lysyl oxidase homolog 2	97.971	Up	0.00178461	LOXL2	39.8	86.724	323.31	106	26	26	2	0	0	33	40	31	3	3	1	25	26	24	3	3	1	25	26	24	666620	5011100	1170400	194120000	312420000	232340000	0.005	0.039	0.026	1.57	2.229	3.059
Biological Process	GO:0048870	5	cell motility	0.000388425	P35579	Myosin-9	2.091	Up	0.042662	MYH9	33.2	226.53	323.31	219	57	45	38	21	11	44	74	31	41	36	21	48	55	43	33	30	19	38	45	35	14494000	8704600	4148000	18023000	38284000	14179000	0.949	0.527	0.732	1.111	2.082	1.424
Biological Process	GO:0048870	5	cell motility	0.000388425	P35052	Glypican-1	6.895	Up	0.0086422	GPC1	12.9	61.68	23.613	12	5	5	0	0	0	4	3	5	2	1	1	4	5	4	2	1	1	4	5	4	724470	242550	240590	2585200	5283300	2729100	0.393	0.121	0.352	1.321	2.38	2.27
Biological Process	GO:0048870	5	cell motility	0.000388425	P50281	Matrix metalloproteinase-14	6.248	Up	0.033159	MMP14	4.3	65.893	17.655	4	2	2	1	0	1	1	1	0	1	0	1	1	2	0	1	0	1	1	2	0	560520	0	338470	3749200	6850500	0	0.208		0.34	1.311	2.113
Biological Process	GO:0048870	5	cell motility	0.000388425	Q08629	Testican-1	66.774	Up	0.0048835	SPOCK1	40.1	49.124	139.54	49	15	15	0	1	1	13	24	10	2	5	2	13	15	13	2	5	2	13	15	13	781440	3773900	122840	48510000	200270000	59872000	0.016	0.071	0.006	0.934	3.4	1.876
Biological Process	GO:0048870	5	cell motility	0.000388425	O00339	Matrilin-2	5.582	Up	0.020144	MATN2	19	106.84	96.642	41	16	16	4	0	1	11	19	6	5	1	3	14	15	10	5	1	3	14	15	10	3198400	1689900	1925900	15212000	36530000	7126800	0.312	0.152	0.507	1.397	2.958	1.065
Biological Process	GO:0048870	5	cell motility	0.000388425	P19022	Cadherin-2	10.125	Up	0.020937	CDH2	12.1	99.808	74.261	38	9	9	1	5	0	15	10	7	2	4	0	8	9	5	2	4	0	8	9	5	710180	2890000	0	22514000	22758000	7325000	0.067	0.254		2.013	1.795	1.067
Biological Process	GO:0048870	5	cell motility	0.000388425	P13611	Versican core protein	20.948	Up	0.00056156	VCAN	7	372.82	323.31	69	19	19	0	4	0	23	25	17	3	7	3	18	19	19	3	7	3	18	19	19	1128300	1425500	1067700	31270000	48598000	27155000	0.065	0.076	0.167	1.705	2.336	2.411
Biological Process	GO:0048870	5	cell motility	0.000388425	Q9UNN8	Endothelial protein C receptor	4.576	Up	0.026459	PROCR	3.8	26.671	1.5589	2	1	1	0	0	0	1	1	0	1	1	1	1	1	1	1	1	1	1	1	1	669160	1232300	170330	3702900	4083400	2281000	0.353	0.601	0.242	1.839	1.789	1.845
Biological Process	GO:0048870	5	cell motility	0.000388425	O00622	Protein CYR61	7.006	Up	0.027799	CYR61	27.3	42.026	33.987	23	8	8	3	2	2	8	5	3	5	2	3	7	6	5	5	2	3	7	6	5	7543100	2060100	876710	48582000	13641000	16819000	0.54	0.136	0.17	3.272	0.81	1.845
Biological Process	GO:0030335	8	positive regulation of cell migration	0.0215652	P19876	C-X-C motif chemokine 3	33.42	Up	0.0195594	CXCL3	45.8	11.342	59.848	12	4	3	0	1	0	2	3	6	1	2	1	4	4	4	1	2	1	3	3	3	1342600	519640	735400	17964000	11262000	66575000	0.088	0.032	0.13	1.101	0.609	6.645
Biological Process	GO:0030335	8	positive regulation of cell migration	0.0215652	O60687	Sushi repeat-containing protein SRPX2	19.744	Up	0.039323	SRPX2	33.8	52.971	82.027	42	12	12	1	0	0	13	17	11	4	2	1	12	12	12	4	2	1	12	12	12	5990700	596270	391460	51851000	62309000	32087000	0.251	0.023	0.043	2.04	2.163	2.056
Biological Process	GO:0030335	8	positive regulation of cell migration	0.0215652	O14786	Neuropilin-1	13.08	Up	0.0148198	NRP1	9.2	103.13	64.877	11	6	6	1	0	1	1	4	4	1	1	1	3	6	5	1	1	1	3	6	5	126450	248210	86880	757100	3121500	2859100	0.112	0.204	0.207	0.634	2.307	3.9
Biological Process	GO:0030335	8	positive regulation of cell migration	0.0215652	Q15063	Periostin	16.047	Up	0.031338	POSTN	48.9	93.313	323.31	109	31	13	0	15	1	22	42	29	5	23	5	28	31	28	1	10	1	11	13	11	1390500	63201000	1462900	154150000	583880000	255670000	0.009	0.353	0.023	0.877	2.931	2.37
Biological Process	GO:0030335	8	positive regulation of cell migration	0.0215652	P05121	Plasminogen activator inhibitor 1	2.572	Up	0.0112754	SERPINE1	49.3	45.059	323.31	290	20	20	41	44	24	75	56	50	18	19	18	20	20	19	18	19	18	20	20	19	696760000	1081900000	342880000	3286900000	2170100000	1205400000	0.508	0.73	0.674	2.256	1.314	1.347
Biological Process	GO:0030335	8	positive regulation of cell migration	0.0215652	Q9GZP0	Platelet-derived growth factor D	16.251	Up	0.0095559	PDGFD	13.2	42.848	9.1286	11	4	4	1	0	1	2	2	5	1	1	1	3	3	4	1	1	1	3	3	4	175330	1553700	111740	11601000	7599100	8976200	0.037	0.307	0.063	2.331	1.347	2.936
Biological Process	GO:0030335	8	positive regulation of cell migration	0.0215652	P50281	Matrix metalloproteinase-14	6.248	Up	0.033159	MMP14	4.3	65.893	17.655	4	2	2	1	0	1	1	1	0	1	0	1	1	2	0	1	0	1	1	2	0	560520	0	338470	3749200	6850500	0	0.208		0.34	1.311	2.113
Biological Process	GO:0030335	8	positive regulation of cell migration	0.0215652	O00622	Protein CYR61	7.006	Up	0.027799	CYR61	27.3	42.026	33.987	23	8	8	3	2	2	8	5	3	5	2	3	7	6	5	5	2	3	7	6	5	7543100	2060100	876710	48582000	13641000	16819000	0.54	0.136	0.17	3.272	0.81	1.845
Biological Process	GO:0051272	6	positive regulation of cellular component movement	0.0321884	P19876	C-X-C motif chemokine 3	33.42	Up	0.0195594	CXCL3	45.8	11.342	59.848	12	4	3	0	1	0	2	3	6	1	2	1	4	4	4	1	2	1	3	3	3	1342600	519640	735400	17964000	11262000	66575000	0.088	0.032	0.13	1.101	0.609	6.645
Biological Process	GO:0051272	6	positive regulation of cellular component movement	0.0321884	O60687	Sushi repeat-containing protein SRPX2	19.744	Up	0.039323	SRPX2	33.8	52.971	82.027	42	12	12	1	0	0	13	17	11	4	2	1	12	12	12	4	2	1	12	12	12	5990700	596270	391460	51851000	62309000	32087000	0.251	0.023	0.043	2.04	2.163	2.056
Biological Process	GO:0051272	6	positive regulation of cellular component movement	0.0321884	O14786	Neuropilin-1	13.08	Up	0.0148198	NRP1	9.2	103.13	64.877	11	6	6	1	0	1	1	4	4	1	1	1	3	6	5	1	1	1	3	6	5	126450	248210	86880	757100	3121500	2859100	0.112	0.204	0.207	0.634	2.307	3.9
Biological Process	GO:0051272	6	positive regulation of cellular component movement	0.0321884	Q15063	Periostin	16.047	Up	0.031338	POSTN	48.9	93.313	323.31	109	31	13	0	15	1	22	42	29	5	23	5	28	31	28	1	10	1	11	13	11	1390500	63201000	1462900	154150000	583880000	255670000	0.009	0.353	0.023	0.877	2.931	2.37
Biological Process	GO:0051272	6	positive regulation of cellular component movement	0.0321884	P05121	Plasminogen activator inhibitor 1	2.572	Up	0.0112754	SERPINE1	49.3	45.059	323.31	290	20	20	41	44	24	75	56	50	18	19	18	20	20	19	18	19	18	20	20	19	696760000	1081900000	342880000	3286900000	2170100000	1205400000	0.508	0.73	0.674	2.256	1.314	1.347
Biological Process	GO:0051272	6	positive regulation of cellular component movement	0.0321884	Q9GZP0	Platelet-derived growth factor D	16.251	Up	0.0095559	PDGFD	13.2	42.848	9.1286	11	4	4	1	0	1	2	2	5	1	1	1	3	3	4	1	1	1	3	3	4	175330	1553700	111740	11601000	7599100	8976200	0.037	0.307	0.063	2.331	1.347	2.936
Biological Process	GO:0051272	6	positive regulation of cellular component movement	0.0321884	P50281	Matrix metalloproteinase-14	6.248	Up	0.033159	MMP14	4.3	65.893	17.655	4	2	2	1	0	1	1	1	0	1	0	1	1	2	0	1	0	1	1	2	0	560520	0	338470	3749200	6850500	0	0.208		0.34	1.311	2.113
Biological Process	GO:0051272	6	positive regulation of cellular component movement	0.0321884	O00622	Protein CYR61	7.006	Up	0.027799	CYR61	27.3	42.026	33.987	23	8	8	3	2	2	8	5	3	5	2	3	7	6	5	5	2	3	7	6	5	7543100	2060100	876710	48582000	13641000	16819000	0.54	0.136	0.17	3.272	0.81	1.845
Biological Process	GO:0040017	5	positive regulation of locomotion	0.0410042	P19876	C-X-C motif chemokine 3	33.42	Up	0.0195594	CXCL3	45.8	11.342	59.848	12	4	3	0	1	0	2	3	6	1	2	1	4	4	4	1	2	1	3	3	3	1342600	519640	735400	17964000	11262000	66575000	0.088	0.032	0.13	1.101	0.609	6.645
Biological Process	GO:0040017	5	positive regulation of locomotion	0.0410042	O60687	Sushi repeat-containing protein SRPX2	19.744	Up	0.039323	SRPX2	33.8	52.971	82.027	42	12	12	1	0	0	13	17	11	4	2	1	12	12	12	4	2	1	12	12	12	5990700	596270	391460	51851000	62309000	32087000	0.251	0.023	0.043	2.04	2.163	2.056
Biological Process	GO:0040017	5	positive regulation of locomotion	0.0410042	O14786	Neuropilin-1	13.08	Up	0.0148198	NRP1	9.2	103.13	64.877	11	6	6	1	0	1	1	4	4	1	1	1	3	6	5	1	1	1	3	6	5	126450	248210	86880	757100	3121500	2859100	0.112	0.204	0.207	0.634	2.307	3.9
Biological Process	GO:0040017	5	positive regulation of locomotion	0.0410042	Q15063	Periostin	16.047	Up	0.031338	POSTN	48.9	93.313	323.31	109	31	13	0	15	1	22	42	29	5	23	5	28	31	28	1	10	1	11	13	11	1390500	63201000	1462900	154150000	583880000	255670000	0.009	0.353	0.023	0.877	2.931	2.37
Biological Process	GO:0040017	5	positive regulation of locomotion	0.0410042	P05121	Plasminogen activator inhibitor 1	2.572	Up	0.0112754	SERPINE1	49.3	45.059	323.31	290	20	20	41	44	24	75	56	50	18	19	18	20	20	19	18	19	18	20	20	19	696760000	1081900000	342880000	3286900000	2170100000	1205400000	0.508	0.73	0.674	2.256	1.314	1.347
Biological Process	GO:0040017	5	positive regulation of locomotion	0.0410042	Q9GZP0	Platelet-derived growth factor D	16.251	Up	0.0095559	PDGFD	13.2	42.848	9.1286	11	4	4	1	0	1	2	2	5	1	1	1	3	3	4	1	1	1	3	3	4	175330	1553700	111740	11601000	7599100	8976200	0.037	0.307	0.063	2.331	1.347	2.936
Biological Process	GO:0040017	5	positive regulation of locomotion	0.0410042	P50281	Matrix metalloproteinase-14	6.248	Up	0.033159	MMP14	4.3	65.893	17.655	4	2	2	1	0	1	1	1	0	1	0	1	1	2	0	1	0	1	1	2	0	560520	0	338470	3749200	6850500	0	0.208		0.34	1.311	2.113
Biological Process	GO:0040017	5	positive regulation of locomotion	0.0410042	O00622	Protein CYR61	7.006	Up	0.027799	CYR61	27.3	42.026	33.987	23	8	8	3	2	2	8	5	3	5	2	3	7	6	5	5	2	3	7	6	5	7543100	2060100	876710	48582000	13641000	16819000	0.54	0.136	0.17	3.272	0.81	1.845
Biological Process	GO:0010632	8	regulation of epithelial cell migration	0.0477491	O60687	Sushi repeat-containing protein SRPX2	19.744	Up	0.039323	SRPX2	33.8	52.971	82.027	42	12	12	1	0	0	13	17	11	4	2	1	12	12	12	4	2	1	12	12	12	5990700	596270	391460	51851000	62309000	32087000	0.251	0.023	0.043	2.04	2.163	2.056
Biological Process	GO:0010632	8	regulation of epithelial cell migration	0.0477491	O14786	Neuropilin-1	13.08	Up	0.0148198	NRP1	9.2	103.13	64.877	11	6	6	1	0	1	1	4	4	1	1	1	3	6	5	1	1	1	3	6	5	126450	248210	86880	757100	3121500	2859100	0.112	0.204	0.207	0.634	2.307	3.9
Biological Process	GO:0010632	8	regulation of epithelial cell migration	0.0477491	P36955	Pigment epithelium-derived factor	5.022	Up	0.042517	SERPINF1	31.1	46.312	90.643	59	13	9	6	4	5	13	17	14	5	6	5	11	12	12	1	2	1	7	8	8	24428000	22346000	22355000	75787000	187740000	197270000	0.296	0.25	0.729	0.862	1.885	3.656
Biological Process	GO:0010632	8	regulation of epithelial cell migration	0.0477491	P07585	Decorin	45.345	Up	0.0174386	DCN	30.1	39.746	232.11	46	10	9	1	2	5	6	20	12	2	5	9	9	10	10	2	4	8	8	9	9	3435200	21371000	21981000	284750000	2299500000	1033400000	0.006	0.035	0.104	0.468	3.338	2.769
Biological Process	GO:0090130	4	tissue migration	0.0380157	O14786	Neuropilin-1	13.08	Up	0.0148198	NRP1	9.2	103.13	64.877	11	6	6	1	0	1	1	4	4	1	1	1	3	6	5	1	1	1	3	6	5	126450	248210	86880	757100	3121500	2859100	0.112	0.204	0.207	0.634	2.307	3.9
Biological Process	GO:0090130	4	tissue migration	0.0380157	Q9Y4K0	Lysyl oxidase homolog 2	97.971	Up	0.00178461	LOXL2	39.8	86.724	323.31	106	26	26	2	0	0	33	40	31	3	3	1	25	26	24	3	3	1	25	26	24	666620	5011100	1170400	194120000	312420000	232340000	0.005	0.039	0.026	1.57	2.229	3.059
Biological Process	GO:0090130	4	tissue migration	0.0380157	P35579	Myosin-9	2.091	Up	0.042662	MYH9	33.2	226.53	323.31	219	57	45	38	21	11	44	74	31	41	36	21	48	55	43	33	30	19	38	45	35	14494000	8704600	4148000	18023000	38284000	14179000	0.949	0.527	0.732	1.111	2.082	1.424
Biological Process	GO:2000147	7	positive regulation of cell motility	0.0302079	P19876	C-X-C motif chemokine 3	33.42	Up	0.0195594	CXCL3	45.8	11.342	59.848	12	4	3	0	1	0	2	3	6	1	2	1	4	4	4	1	2	1	3	3	3	1342600	519640	735400	17964000	11262000	66575000	0.088	0.032	0.13	1.101	0.609	6.645
Biological Process	GO:2000147	7	positive regulation of cell motility	0.0302079	O60687	Sushi repeat-containing protein SRPX2	19.744	Up	0.039323	SRPX2	33.8	52.971	82.027	42	12	12	1	0	0	13	17	11	4	2	1	12	12	12	4	2	1	12	12	12	5990700	596270	391460	51851000	62309000	32087000	0.251	0.023	0.043	2.04	2.163	2.056
Biological Process	GO:2000147	7	positive regulation of cell motility	0.0302079	O14786	Neuropilin-1	13.08	Up	0.0148198	NRP1	9.2	103.13	64.877	11	6	6	1	0	1	1	4	4	1	1	1	3	6	5	1	1	1	3	6	5	126450	248210	86880	757100	3121500	2859100	0.112	0.204	0.207	0.634	2.307	3.9
Biological Process	GO:2000147	7	positive regulation of cell motility	0.0302079	Q15063	Periostin	16.047	Up	0.031338	POSTN	48.9	93.313	323.31	109	31	13	0	15	1	22	42	29	5	23	5	28	31	28	1	10	1	11	13	11	1390500	63201000	1462900	154150000	583880000	255670000	0.009	0.353	0.023	0.877	2.931	2.37
Biological Process	GO:2000147	7	positive regulation of cell motility	0.0302079	P05121	Plasminogen activator inhibitor 1	2.572	Up	0.0112754	SERPINE1	49.3	45.059	323.31	290	20	20	41	44	24	75	56	50	18	19	18	20	20	19	18	19	18	20	20	19	696760000	1081900000	342880000	3286900000	2170100000	1205400000	0.508	0.73	0.674	2.256	1.314	1.347
Biological Process	GO:2000147	7	positive regulation of cell motility	0.0302079	Q9GZP0	Platelet-derived growth factor D	16.251	Up	0.0095559	PDGFD	13.2	42.848	9.1286	11	4	4	1	0	1	2	2	5	1	1	1	3	3	4	1	1	1	3	3	4	175330	1553700	111740	11601000	7599100	8976200	0.037	0.307	0.063	2.331	1.347	2.936
Biological Process	GO:2000147	7	positive regulation of cell motility	0.0302079	P50281	Matrix metalloproteinase-14	6.248	Up	0.033159	MMP14	4.3	65.893	17.655	4	2	2	1	0	1	1	1	0	1	0	1	1	2	0	1	0	1	1	2	0	560520	0	338470	3749200	6850500	0	0.208		0.34	1.311	2.113
Biological Process	GO:2000147	7	positive regulation of cell motility	0.0302079	O00622	Protein CYR61	7.006	Up	0.027799	CYR61	27.3	42.026	33.987	23	8	8	3	2	2	8	5	3	5	2	3	7	6	5	5	2	3	7	6	5	7543100	2060100	876710	48582000	13641000	16819000	0.54	0.136	0.17	3.272	0.81	1.845
Biological Process	GO:0010594	9	regulation of endothelial cell migration	0.0150821	O60687	Sushi repeat-containing protein SRPX2	19.744	Up	0.039323	SRPX2	33.8	52.971	82.027	42	12	12	1	0	0	13	17	11	4	2	1	12	12	12	4	2	1	12	12	12	5990700	596270	391460	51851000	62309000	32087000	0.251	0.023	0.043	2.04	2.163	2.056
Biological Process	GO:0010594	9	regulation of endothelial cell migration	0.0150821	O14786	Neuropilin-1	13.08	Up	0.0148198	NRP1	9.2	103.13	64.877	11	6	6	1	0	1	1	4	4	1	1	1	3	6	5	1	1	1	3	6	5	126450	248210	86880	757100	3121500	2859100	0.112	0.204	0.207	0.634	2.307	3.9
Biological Process	GO:0010594	9	regulation of endothelial cell migration	0.0150821	P36955	Pigment epithelium-derived factor	5.022	Up	0.042517	SERPINF1	31.1	46.312	90.643	59	13	9	6	4	5	13	17	14	5	6	5	11	12	12	1	2	1	7	8	8	24428000	22346000	22355000	75787000	187740000	197270000	0.296	0.25	0.729	0.862	1.885	3.656
Biological Process	GO:0010594	9	regulation of endothelial cell migration	0.0150821	P07585	Decorin	45.345	Up	0.0174386	DCN	30.1	39.746	232.11	46	10	9	1	2	5	6	20	12	2	5	9	9	10	10	2	4	8	8	9	9	3435200	21371000	21981000	284750000	2299500000	1033400000	0.006	0.035	0.104	0.468	3.338	2.769
Biological Process	GO:0051674	3	localization of cell	0.000388425	P19876	C-X-C motif chemokine 3	33.42	Up	0.0195594	CXCL3	45.8	11.342	59.848	12	4	3	0	1	0	2	3	6	1	2	1	4	4	4	1	2	1	3	3	3	1342600	519640	735400	17964000	11262000	66575000	0.088	0.032	0.13	1.101	0.609	6.645
Biological Process	GO:0051674	3	localization of cell	0.000388425	O60687	Sushi repeat-containing protein SRPX2	19.744	Up	0.039323	SRPX2	33.8	52.971	82.027	42	12	12	1	0	0	13	17	11	4	2	1	12	12	12	4	2	1	12	12	12	5990700	596270	391460	51851000	62309000	32087000	0.251	0.023	0.043	2.04	2.163	2.056
Biological Process	GO:0051674	3	localization of cell	0.000388425	P08123	Collagen alpha-2(I) chain	7.798	Up	0.025324	COL1A2	68.7	129.31	323.31	518	61	60	60	54	19	146	96	143	52	48	28	60	59	59	51	47	27	59	58	58	278620000	258050000	34024000	1623600000	685150000	1723900000	0.387	0.332	0.127	2.127	0.792	3.678
Biological Process	GO:0051674	3	localization of cell	0.000388425	O14786	Neuropilin-1	13.08	Up	0.0148198	NRP1	9.2	103.13	64.877	11	6	6	1	0	1	1	4	4	1	1	1	3	6	5	1	1	1	3	6	5	126450	248210	86880	757100	3121500	2859100	0.112	0.204	0.207	0.634	2.307	3.9
Biological Process	GO:0051674	3	localization of cell	0.000388425	Q96CG8	Collagen triple helix repeat-containing protein 1	20.075	Up	0.00065888	CTHRC1	34.2	26.224	67.085	21	7	7	3	0	0	5	7	6	4	3	2	7	7	5	4	3	2	7	7	5	5132900	5470900	1166300	105070000	144000000	32728000	0.112	0.111	0.069	2.158	2.609	1.095
Biological Process	GO:0051674	3	localization of cell	0.000388425	Q9Y4K0	Lysyl oxidase homolog 2	97.971	Up	0.00178461	LOXL2	39.8	86.724	323.31	106	26	26	2	0	0	33	40	31	3	3	1	25	26	24	3	3	1	25	26	24	666620	5011100	1170400	194120000	312420000	232340000	0.005	0.039	0.026	1.57	2.229	3.059
Biological Process	GO:0051674	3	localization of cell	0.000388425	P35579	Myosin-9	2.091	Up	0.042662	MYH9	33.2	226.53	323.31	219	57	45	38	21	11	44	74	31	41	36	21	48	55	43	33	30	19	38	45	35	14494000	8704600	4148000	18023000	38284000	14179000	0.949	0.527	0.732	1.111	2.082	1.424
Biological Process	GO:0051674	3	localization of cell	0.000388425	P35052	Glypican-1	6.895	Up	0.0086422	GPC1	12.9	61.68	23.613	12	5	5	0	0	0	4	3	5	2	1	1	4	5	4	2	1	1	4	5	4	724470	242550	240590	2585200	5283300	2729100	0.393	0.121	0.352	1.321	2.38	2.27
Biological Process	GO:0051674	3	localization of cell	0.000388425	P50281	Matrix metalloproteinase-14	6.248	Up	0.033159	MMP14	4.3	65.893	17.655	4	2	2	1	0	1	1	1	0	1	0	1	1	2	0	1	0	1	1	2	0	560520	0	338470	3749200	6850500	0	0.208		0.34	1.311	2.113
Biological Process	GO:0051674	3	localization of cell	0.000388425	Q08629	Testican-1	66.774	Up	0.0048835	SPOCK1	40.1	49.124	139.54	49	15	15	0	1	1	13	24	10	2	5	2	13	15	13	2	5	2	13	15	13	781440	3773900	122840	48510000	200270000	59872000	0.016	0.071	0.006	0.934	3.4	1.876
Biological Process	GO:0051674	3	localization of cell	0.000388425	O00339	Matrilin-2	5.582	Up	0.020144	MATN2	19	106.84	96.642	41	16	16	4	0	1	11	19	6	5	1	3	14	15	10	5	1	3	14	15	10	3198400	1689900	1925900	15212000	36530000	7126800	0.312	0.152	0.507	1.397	2.958	1.065
Biological Process	GO:0051674	3	localization of cell	0.000388425	P19022	Cadherin-2	10.125	Up	0.020937	CDH2	12.1	99.808	74.261	38	9	9	1	5	0	15	10	7	2	4	0	8	9	5	2	4	0	8	9	5	710180	2890000	0	22514000	22758000	7325000	0.067	0.254		2.013	1.795	1.067
Biological Process	GO:0051674	3	localization of cell	0.000388425	P13611	Versican core protein	20.948	Up	0.00056156	VCAN	7	372.82	323.31	69	19	19	0	4	0	23	25	17	3	7	3	18	19	19	3	7	3	18	19	19	1128300	1425500	1067700	31270000	48598000	27155000	0.065	0.076	0.167	1.705	2.336	2.411
Biological Process	GO:0051674	3	localization of cell	0.000388425	Q9UNN8	Endothelial protein C receptor	4.576	Up	0.026459	PROCR	3.8	26.671	1.5589	2	1	1	0	0	0	1	1	0	1	1	1	1	1	1	1	1	1	1	1	1	669160	1232300	170330	3702900	4083400	2281000	0.353	0.601	0.242	1.839	1.789	1.845
Biological Process	GO:0051674	3	localization of cell	0.000388425	O00622	Protein CYR61	7.006	Up	0.027799	CYR61	27.3	42.026	33.987	23	8	8	3	2	2	8	5	3	5	2	3	7	6	5	5	2	3	7	6	5	7543100	2060100	876710	48582000	13641000	16819000	0.54	0.136	0.17	3.272	0.81	1.845
Biological Process	GO:0010633	9	negative regulation of epithelial cell migration	0.0988713	P36955	Pigment epithelium-derived factor	5.022	Up	0.042517	SERPINF1	31.1	46.312	90.643	59	13	9	6	4	5	13	17	14	5	6	5	11	12	12	1	2	1	7	8	8	24428000	22346000	22355000	75787000	187740000	197270000	0.296	0.25	0.729	0.862	1.885	3.656
Biological Process	GO:0010633	9	negative regulation of epithelial cell migration	0.0988713	P07585	Decorin	45.345	Up	0.0174386	DCN	30.1	39.746	232.11	46	10	9	1	2	5	6	20	12	2	5	9	9	10	10	2	4	8	8	9	9	3435200	21371000	21981000	284750000	2299500000	1033400000	0.006	0.035	0.104	0.468	3.338	2.769
Biological Process	GO:0016477	6	cell migration	0.00084412	P19876	C-X-C motif chemokine 3	33.42	Up	0.0195594	CXCL3	45.8	11.342	59.848	12	4	3	0	1	0	2	3	6	1	2	1	4	4	4	1	2	1	3	3	3	1342600	519640	735400	17964000	11262000	66575000	0.088	0.032	0.13	1.101	0.609	6.645
Biological Process	GO:0016477	6	cell migration	0.00084412	P08123	Collagen alpha-2(I) chain	7.798	Up	0.025324	COL1A2	68.7	129.31	323.31	518	61	60	60	54	19	146	96	143	52	48	28	60	59	59	51	47	27	59	58	58	278620000	258050000	34024000	1623600000	685150000	1723900000	0.387	0.332	0.127	2.127	0.792	3.678
Biological Process	GO:0016477	6	cell migration	0.00084412	O14786	Neuropilin-1	13.08	Up	0.0148198	NRP1	9.2	103.13	64.877	11	6	6	1	0	1	1	4	4	1	1	1	3	6	5	1	1	1	3	6	5	126450	248210	86880	757100	3121500	2859100	0.112	0.204	0.207	0.634	2.307	3.9
Biological Process	GO:0016477	6	cell migration	0.00084412	Q96CG8	Collagen triple helix repeat-containing protein 1	20.075	Up	0.00065888	CTHRC1	34.2	26.224	67.085	21	7	7	3	0	0	5	7	6	4	3	2	7	7	5	4	3	2	7	7	5	5132900	5470900	1166300	105070000	144000000	32728000	0.112	0.111	0.069	2.158	2.609	1.095
Biological Process	GO:0016477	6	cell migration	0.00084412	Q9Y4K0	Lysyl oxidase homolog 2	97.971	Up	0.00178461	LOXL2	39.8	86.724	323.31	106	26	26	2	0	0	33	40	31	3	3	1	25	26	24	3	3	1	25	26	24	666620	5011100	1170400	194120000	312420000	232340000	0.005	0.039	0.026	1.57	2.229	3.059
Biological Process	GO:0016477	6	cell migration	0.00084412	P35579	Myosin-9	2.091	Up	0.042662	MYH9	33.2	226.53	323.31	219	57	45	38	21	11	44	74	31	41	36	21	48	55	43	33	30	19	38	45	35	14494000	8704600	4148000	18023000	38284000	14179000	0.949	0.527	0.732	1.111	2.082	1.424
Biological Process	GO:0016477	6	cell migration	0.00084412	P35052	Glypican-1	6.895	Up	0.0086422	GPC1	12.9	61.68	23.613	12	5	5	0	0	0	4	3	5	2	1	1	4	5	4	2	1	1	4	5	4	724470	242550	240590	2585200	5283300	2729100	0.393	0.121	0.352	1.321	2.38	2.27
Biological Process	GO:0016477	6	cell migration	0.00084412	P50281	Matrix metalloproteinase-14	6.248	Up	0.033159	MMP14	4.3	65.893	17.655	4	2	2	1	0	1	1	1	0	1	0	1	1	2	0	1	0	1	1	2	0	560520	0	338470	3749200	6850500	0	0.208		0.34	1.311	2.113
Biological Process	GO:0016477	6	cell migration	0.00084412	Q08629	Testican-1	66.774	Up	0.0048835	SPOCK1	40.1	49.124	139.54	49	15	15	0	1	1	13	24	10	2	5	2	13	15	13	2	5	2	13	15	13	781440	3773900	122840	48510000	200270000	59872000	0.016	0.071	0.006	0.934	3.4	1.876
Biological Process	GO:0016477	6	cell migration	0.00084412	O00339	Matrilin-2	5.582	Up	0.020144	MATN2	19	106.84	96.642	41	16	16	4	0	1	11	19	6	5	1	3	14	15	10	5	1	3	14	15	10	3198400	1689900	1925900	15212000	36530000	7126800	0.312	0.152	0.507	1.397	2.958	1.065
Biological Process	GO:0016477	6	cell migration	0.00084412	P19022	Cadherin-2	10.125	Up	0.020937	CDH2	12.1	99.808	74.261	38	9	9	1	5	0	15	10	7	2	4	0	8	9	5	2	4	0	8	9	5	710180	2890000	0	22514000	22758000	7325000	0.067	0.254		2.013	1.795	1.067
Biological Process	GO:0016477	6	cell migration	0.00084412	P13611	Versican core protein	20.948	Up	0.00056156	VCAN	7	372.82	323.31	69	19	19	0	4	0	23	25	17	3	7	3	18	19	19	3	7	3	18	19	19	1128300	1425500	1067700	31270000	48598000	27155000	0.065	0.076	0.167	1.705	2.336	2.411
Biological Process	GO:0016477	6	cell migration	0.00084412	Q9UNN8	Endothelial protein C receptor	4.576	Up	0.026459	PROCR	3.8	26.671	1.5589	2	1	1	0	0	0	1	1	0	1	1	1	1	1	1	1	1	1	1	1	1	669160	1232300	170330	3702900	4083400	2281000	0.353	0.601	0.242	1.839	1.789	1.845
Biological Process	GO:0016477	6	cell migration	0.00084412	O00622	Protein CYR61	7.006	Up	0.027799	CYR61	27.3	42.026	33.987	23	8	8	3	2	2	8	5	3	5	2	3	7	6	5	5	2	3	7	6	5	7543100	2060100	876710	48582000	13641000	16819000	0.54	0.136	0.17	3.272	0.81	1.845
Biological Process	GO:0010631	8	epithelial cell migration	0.0224262	O14786	Neuropilin-1	13.08	Up	0.0148198	NRP1	9.2	103.13	64.877	11	6	6	1	0	1	1	4	4	1	1	1	3	6	5	1	1	1	3	6	5	126450	248210	86880	757100	3121500	2859100	0.112	0.204	0.207	0.634	2.307	3.9
Biological Process	GO:0010631	8	epithelial cell migration	0.0224262	Q9Y4K0	Lysyl oxidase homolog 2	97.971	Up	0.00178461	LOXL2	39.8	86.724	323.31	106	26	26	2	0	0	33	40	31	3	3	1	25	26	24	3	3	1	25	26	24	666620	5011100	1170400	194120000	312420000	232340000	0.005	0.039	0.026	1.57	2.229	3.059
Biological Process	GO:0010631	8	epithelial cell migration	0.0224262	P35579	Myosin-9	2.091	Up	0.042662	MYH9	33.2	226.53	323.31	219	57	45	38	21	11	44	74	31	41	36	21	48	55	43	33	30	19	38	45	35	14494000	8704600	4148000	18023000	38284000	14179000	0.949	0.527	0.732	1.111	2.082	1.424
Biological Process	GO:0030308	7	negative regulation of cell growth	0.073326	O14786	Neuropilin-1	13.08	Up	0.0148198	NRP1	9.2	103.13	64.877	11	6	6	1	0	1	1	4	4	1	1	1	3	6	5	1	1	1	3	6	5	126450	248210	86880	757100	3121500	2859100	0.112	0.204	0.207	0.634	2.307	3.9
Biological Process	GO:0030308	7	negative regulation of cell growth	0.073326	P07093	Glia-derived nexin	11.771	Up	0.0067036	SERPINE2	46.2	44.002	169.23	127	17	17	12	5	6	33	47	24	12	9	9	16	16	14	12	9	9	16	16	14	132430000	37889000	41650000	871260000	2057200000	504660000	0.233	0.061	0.199	1.441	3.002	1.36
Biological Process	GO:0030308	7	negative regulation of cell growth	0.073326	P08476	Inhibin beta A chain	24.045	Up	0.027082	INHBA	27.9	47.442	105.8	37	10	10	2	1	0	15	13	6	4	2	2	10	10	7	4	2	2	10	10	7	1176200	1032900	392470	51990000	22598000	5842500	0.091	0.074	0.081	3.776	1.448	0.691
Biological Process	GO:0040011	2	locomotion	0.000216217	Q9BUD6	Spondin-2	184.242	Up	0.00041536	SPON2	36	35.846	228.89	60	10	10	0	1	0	18	26	15	3	3	2	10	10	9	3	3	2	10	10	9	2450400	2740400	2753300	531960000	1504000000	325430000	0.006	0.007	0.02	1.354	3.377	1.349
Biological Process	GO:0040011	2	locomotion	0.000216217	P08123	Collagen alpha-2(I) chain	7.798	Up	0.025324	COL1A2	68.7	129.31	323.31	518	61	60	60	54	19	146	96	143	52	48	28	60	59	59	51	47	27	59	58	58	278620000	258050000	34024000	1623600000	685150000	1723900000	0.387	0.332	0.127	2.127	0.792	3.678
Biological Process	GO:0040011	2	locomotion	0.000216217	O14786	Neuropilin-1	13.08	Up	0.0148198	NRP1	9.2	103.13	64.877	11	6	6	1	0	1	1	4	4	1	1	1	3	6	5	1	1	1	3	6	5	126450	248210	86880	757100	3121500	2859100	0.112	0.204	0.207	0.634	2.307	3.9
Biological Process	GO:0040011	2	locomotion	0.000216217	Q9Y4K0	Lysyl oxidase homolog 2	97.971	Up	0.00178461	LOXL2	39.8	86.724	323.31	106	26	26	2	0	0	33	40	31	3	3	1	25	26	24	3	3	1	25	26	24	666620	5011100	1170400	194120000	312420000	232340000	0.005	0.039	0.026	1.57	2.229	3.059
Biological Process	GO:0040011	2	locomotion	0.000216217	P35052	Glypican-1	6.895	Up	0.0086422	GPC1	12.9	61.68	23.613	12	5	5	0	0	0	4	3	5	2	1	1	4	5	4	2	1	1	4	5	4	724470	242550	240590	2585200	5283300	2729100	0.393	0.121	0.352	1.321	2.38	2.27
Biological Process	GO:0040011	2	locomotion	0.000216217	P50281	Matrix metalloproteinase-14	6.248	Up	0.033159	MMP14	4.3	65.893	17.655	4	2	2	1	0	1	1	1	0	1	0	1	1	2	0	1	0	1	1	2	0	560520	0	338470	3749200	6850500	0	0.208		0.34	1.311	2.113
Biological Process	GO:0040011	2	locomotion	0.000216217	Q08629	Testican-1	66.774	Up	0.0048835	SPOCK1	40.1	49.124	139.54	49	15	15	0	1	1	13	24	10	2	5	2	13	15	13	2	5	2	13	15	13	781440	3773900	122840	48510000	200270000	59872000	0.016	0.071	0.006	0.934	3.4	1.876
Biological Process	GO:0040011	2	locomotion	0.000216217	O00339	Matrilin-2	5.582	Up	0.020144	MATN2	19	106.84	96.642	41	16	16	4	0	1	11	19	6	5	1	3	14	15	10	5	1	3	14	15	10	3198400	1689900	1925900	15212000	36530000	7126800	0.312	0.152	0.507	1.397	2.958	1.065
Biological Process	GO:0040011	2	locomotion	0.000216217	Q16394	Exostosin-1	3.011	Up	0.014302	EXT1	4	86.254	4.0604	4	3	3	0	0	0	1	2	1	2	2	2	1	3	2	2	2	2	1	3	2	467150	251380	119070	932490	1693100	516750	0.751	0.374	0.519	1.413	2.262	1.275
Biological Process	GO:0040011	2	locomotion	0.000216217	O00622	Protein CYR61	7.006	Up	0.027799	CYR61	27.3	42.026	33.987	23	8	8	3	2	2	8	5	3	5	2	3	7	6	5	5	2	3	7	6	5	7543100	2060100	876710	48582000	13641000	16819000	0.54	0.136	0.17	3.272	0.81	1.845
Biological Process	GO:0040011	2	locomotion	0.000216217	O60687	Sushi repeat-containing protein SRPX2	19.744	Up	0.039323	SRPX2	33.8	52.971	82.027	42	12	12	1	0	0	13	17	11	4	2	1	12	12	12	4	2	1	12	12	12	5990700	596270	391460	51851000	62309000	32087000	0.251	0.023	0.043	2.04	2.163	2.056
Biological Process	GO:0040011	2	locomotion	0.000216217	P19876	C-X-C motif chemokine 3	33.42	Up	0.0195594	CXCL3	45.8	11.342	59.848	12	4	3	0	1	0	2	3	6	1	2	1	4	4	4	1	2	1	3	3	3	1342600	519640	735400	17964000	11262000	66575000	0.088	0.032	0.13	1.101	0.609	6.645
Biological Process	GO:0040011	2	locomotion	0.000216217	O43505	"Beta-1,4-glucuronyltransferase 1"	2.816	Up	0.024224	B4GAT1	8.4	47.119	4.6568	4	3	3	0	0	0	0	3	1	1	1	1	2	3	2	1	1	1	2	3	2	964920	2011500	1042400	5248800	5971000	3899800	0.323	0.623	0.942	1.654	1.66	2.002
Biological Process	GO:0040011	2	locomotion	0.000216217	P35579	Myosin-9	2.091	Up	0.042662	MYH9	33.2	226.53	323.31	219	57	45	38	21	11	44	74	31	41	36	21	48	55	43	33	30	19	38	45	35	14494000	8704600	4148000	18023000	38284000	14179000	0.949	0.527	0.732	1.111	2.082	1.424
Biological Process	GO:0040011	2	locomotion	0.000216217	Q96CG8	Collagen triple helix repeat-containing protein 1	20.075	Up	0.00065888	CTHRC1	34.2	26.224	67.085	21	7	7	3	0	0	5	7	6	4	3	2	7	7	5	4	3	2	7	7	5	5132900	5470900	1166300	105070000	144000000	32728000	0.112	0.111	0.069	2.158	2.609	1.095
Biological Process	GO:0040011	2	locomotion	0.000216217	P19022	Cadherin-2	10.125	Up	0.020937	CDH2	12.1	99.808	74.261	38	9	9	1	5	0	15	10	7	2	4	0	8	9	5	2	4	0	8	9	5	710180	2890000	0	22514000	22758000	7325000	0.067	0.254		2.013	1.795	1.067
Biological Process	GO:0040011	2	locomotion	0.000216217	Q9UNN8	Endothelial protein C receptor	4.576	Up	0.026459	PROCR	3.8	26.671	1.5589	2	1	1	0	0	0	1	1	0	1	1	1	1	1	1	1	1	1	1	1	1	669160	1232300	170330	3702900	4083400	2281000	0.353	0.601	0.242	1.839	1.789	1.845
Biological Process	GO:0040011	2	locomotion	0.000216217	P13611	Versican core protein	20.948	Up	0.00056156	VCAN	7	372.82	323.31	69	19	19	0	4	0	23	25	17	3	7	3	18	19	19	3	7	3	18	19	19	1128300	1425500	1067700	31270000	48598000	27155000	0.065	0.076	0.167	1.705	2.336	2.411
Biological Process	GO:0010595	10	positive regulation of endothelial cell migration	0.0988713	O60687	Sushi repeat-containing protein SRPX2	19.744	Up	0.039323	SRPX2	33.8	52.971	82.027	42	12	12	1	0	0	13	17	11	4	2	1	12	12	12	4	2	1	12	12	12	5990700	596270	391460	51851000	62309000	32087000	0.251	0.023	0.043	2.04	2.163	2.056
Biological Process	GO:0010595	10	positive regulation of endothelial cell migration	0.0988713	O14786	Neuropilin-1	13.08	Up	0.0148198	NRP1	9.2	103.13	64.877	11	6	6	1	0	1	1	4	4	1	1	1	3	6	5	1	1	1	3	6	5	126450	248210	86880	757100	3121500	2859100	0.112	0.204	0.207	0.634	2.307	3.9
Biological Process	GO:0030334	7	regulation of cell migration	0.00404151	P19876	C-X-C motif chemokine 3	33.42	Up	0.0195594	CXCL3	45.8	11.342	59.848	12	4	3	0	1	0	2	3	6	1	2	1	4	4	4	1	2	1	3	3	3	1342600	519640	735400	17964000	11262000	66575000	0.088	0.032	0.13	1.101	0.609	6.645
Biological Process	GO:0030334	7	regulation of cell migration	0.00404151	O60687	Sushi repeat-containing protein SRPX2	19.744	Up	0.039323	SRPX2	33.8	52.971	82.027	42	12	12	1	0	0	13	17	11	4	2	1	12	12	12	4	2	1	12	12	12	5990700	596270	391460	51851000	62309000	32087000	0.251	0.023	0.043	2.04	2.163	2.056
Biological Process	GO:0030334	7	regulation of cell migration	0.00404151	O14786	Neuropilin-1	13.08	Up	0.0148198	NRP1	9.2	103.13	64.877	11	6	6	1	0	1	1	4	4	1	1	1	3	6	5	1	1	1	3	6	5	126450	248210	86880	757100	3121500	2859100	0.112	0.204	0.207	0.634	2.307	3.9
Biological Process	GO:0030334	7	regulation of cell migration	0.00404151	P36955	Pigment epithelium-derived factor	5.022	Up	0.042517	SERPINF1	31.1	46.312	90.643	59	13	9	6	4	5	13	17	14	5	6	5	11	12	12	1	2	1	7	8	8	24428000	22346000	22355000	75787000	187740000	197270000	0.296	0.25	0.729	0.862	1.885	3.656
Biological Process	GO:0030334	7	regulation of cell migration	0.00404151	Q9GZP0	Platelet-derived growth factor D	16.251	Up	0.0095559	PDGFD	13.2	42.848	9.1286	11	4	4	1	0	1	2	2	5	1	1	1	3	3	4	1	1	1	3	3	4	175330	1553700	111740	11601000	7599100	8976200	0.037	0.307	0.063	2.331	1.347	2.936
Biological Process	GO:0030334	7	regulation of cell migration	0.00404151	P50281	Matrix metalloproteinase-14	6.248	Up	0.033159	MMP14	4.3	65.893	17.655	4	2	2	1	0	1	1	1	0	1	0	1	1	2	0	1	0	1	1	2	0	560520	0	338470	3749200	6850500	0	0.208		0.34	1.311	2.113
Biological Process	GO:0030334	7	regulation of cell migration	0.00404151	P02461	Collagen alpha-1(III) chain	18.249	Up	0.00135962	COL3A1	55.5	138.56	323.31	349	60	45	21	9	10	97	117	95	28	18	15	56	57	57	18	12	9	42	42	42	57554000	29731000	34116000	850330000	1397000000	817160000	0.115	0.055	0.184	1.609	2.332	2.519
Biological Process	GO:0030334	7	regulation of cell migration	0.00404151	Q15063	Periostin	16.047	Up	0.031338	POSTN	48.9	93.313	323.31	109	31	13	0	15	1	22	42	29	5	23	5	28	31	28	1	10	1	11	13	11	1390500	63201000	1462900	154150000	583880000	255670000	0.009	0.353	0.023	0.877	2.931	2.37
Biological Process	GO:0030334	7	regulation of cell migration	0.00404151	P05121	Plasminogen activator inhibitor 1	2.572	Up	0.0112754	SERPINE1	49.3	45.059	323.31	290	20	20	41	44	24	75	56	50	18	19	18	20	20	19	18	19	18	20	20	19	696760000	1081900000	342880000	3286900000	2170100000	1205400000	0.508	0.73	0.674	2.256	1.314	1.347
Biological Process	GO:0030334	7	regulation of cell migration	0.00404151	P01033	Metalloproteinase inhibitor 1	25.345	Up	0.0029956	TIMP1	45.4	23.171	295.74	105	7	7	7	8	7	23	36	24	6	5	7	7	7	7	6	5	7	7	7	7	123160000	233850000	201930000	5162900000	14404000000	3598700000	0.033	0.058	0.147	1.313	3.23	1.489
Biological Process	GO:0030334	7	regulation of cell migration	0.00404151	P07093	Glia-derived nexin	11.771	Up	0.0067036	SERPINE2	46.2	44.002	169.23	127	17	17	12	5	6	33	47	24	12	9	9	16	16	14	12	9	9	16	16	14	132430000	37889000	41650000	871260000	2057200000	504660000	0.233	0.061	0.199	1.441	3.002	1.36
Biological Process	GO:0030334	7	regulation of cell migration	0.00404151	O00622	Protein CYR61	7.006	Up	0.027799	CYR61	27.3	42.026	33.987	23	8	8	3	2	2	8	5	3	5	2	3	7	6	5	5	2	3	7	6	5	7543100	2060100	876710	48582000	13641000	16819000	0.54	0.136	0.17	3.272	0.81	1.845
Biological Process	GO:0030334	7	regulation of cell migration	0.00404151	P07585	Decorin	45.345	Up	0.0174386	DCN	30.1	39.746	232.11	46	10	9	1	2	5	6	20	12	2	5	9	9	10	10	2	4	8	8	9	9	3435200	21371000	21981000	284750000	2299500000	1033400000	0.006	0.035	0.104	0.468	3.338	2.769
Biological Process	GO:0040012	4	regulation of locomotion	0.0103326	P19876	C-X-C motif chemokine 3	33.42	Up	0.0195594	CXCL3	45.8	11.342	59.848	12	4	3	0	1	0	2	3	6	1	2	1	4	4	4	1	2	1	3	3	3	1342600	519640	735400	17964000	11262000	66575000	0.088	0.032	0.13	1.101	0.609	6.645
Biological Process	GO:0040012	4	regulation of locomotion	0.0103326	O60687	Sushi repeat-containing protein SRPX2	19.744	Up	0.039323	SRPX2	33.8	52.971	82.027	42	12	12	1	0	0	13	17	11	4	2	1	12	12	12	4	2	1	12	12	12	5990700	596270	391460	51851000	62309000	32087000	0.251	0.023	0.043	2.04	2.163	2.056
Biological Process	GO:0040012	4	regulation of locomotion	0.0103326	O14786	Neuropilin-1	13.08	Up	0.0148198	NRP1	9.2	103.13	64.877	11	6	6	1	0	1	1	4	4	1	1	1	3	6	5	1	1	1	3	6	5	126450	248210	86880	757100	3121500	2859100	0.112	0.204	0.207	0.634	2.307	3.9
Biological Process	GO:0040012	4	regulation of locomotion	0.0103326	P36955	Pigment epithelium-derived factor	5.022	Up	0.042517	SERPINF1	31.1	46.312	90.643	59	13	9	6	4	5	13	17	14	5	6	5	11	12	12	1	2	1	7	8	8	24428000	22346000	22355000	75787000	187740000	197270000	0.296	0.25	0.729	0.862	1.885	3.656
Biological Process	GO:0040012	4	regulation of locomotion	0.0103326	Q9GZP0	Platelet-derived growth factor D	16.251	Up	0.0095559	PDGFD	13.2	42.848	9.1286	11	4	4	1	0	1	2	2	5	1	1	1	3	3	4	1	1	1	3	3	4	175330	1553700	111740	11601000	7599100	8976200	0.037	0.307	0.063	2.331	1.347	2.936
Biological Process	GO:0040012	4	regulation of locomotion	0.0103326	P50281	Matrix metalloproteinase-14	6.248	Up	0.033159	MMP14	4.3	65.893	17.655	4	2	2	1	0	1	1	1	0	1	0	1	1	2	0	1	0	1	1	2	0	560520	0	338470	3749200	6850500	0	0.208		0.34	1.311	2.113
Biological Process	GO:0040012	4	regulation of locomotion	0.0103326	P02461	Collagen alpha-1(III) chain	18.249	Up	0.00135962	COL3A1	55.5	138.56	323.31	349	60	45	21	9	10	97	117	95	28	18	15	56	57	57	18	12	9	42	42	42	57554000	29731000	34116000	850330000	1397000000	817160000	0.115	0.055	0.184	1.609	2.332	2.519
Biological Process	GO:0040012	4	regulation of locomotion	0.0103326	Q15063	Periostin	16.047	Up	0.031338	POSTN	48.9	93.313	323.31	109	31	13	0	15	1	22	42	29	5	23	5	28	31	28	1	10	1	11	13	11	1390500	63201000	1462900	154150000	583880000	255670000	0.009	0.353	0.023	0.877	2.931	2.37
Biological Process	GO:0040012	4	regulation of locomotion	0.0103326	P05121	Plasminogen activator inhibitor 1	2.572	Up	0.0112754	SERPINE1	49.3	45.059	323.31	290	20	20	41	44	24	75	56	50	18	19	18	20	20	19	18	19	18	20	20	19	696760000	1081900000	342880000	3286900000	2170100000	1205400000	0.508	0.73	0.674	2.256	1.314	1.347
Biological Process	GO:0040012	4	regulation of locomotion	0.0103326	P01033	Metalloproteinase inhibitor 1	25.345	Up	0.0029956	TIMP1	45.4	23.171	295.74	105	7	7	7	8	7	23	36	24	6	5	7	7	7	7	6	5	7	7	7	7	123160000	233850000	201930000	5162900000	14404000000	3598700000	0.033	0.058	0.147	1.313	3.23	1.489
Biological Process	GO:0040012	4	regulation of locomotion	0.0103326	P07093	Glia-derived nexin	11.771	Up	0.0067036	SERPINE2	46.2	44.002	169.23	127	17	17	12	5	6	33	47	24	12	9	9	16	16	14	12	9	9	16	16	14	132430000	37889000	41650000	871260000	2057200000	504660000	0.233	0.061	0.199	1.441	3.002	1.36
Biological Process	GO:0040012	4	regulation of locomotion	0.0103326	O00622	Protein CYR61	7.006	Up	0.027799	CYR61	27.3	42.026	33.987	23	8	8	3	2	2	8	5	3	5	2	3	7	6	5	5	2	3	7	6	5	7543100	2060100	876710	48582000	13641000	16819000	0.54	0.136	0.17	3.272	0.81	1.845
Biological Process	GO:0040012	4	regulation of locomotion	0.0103326	P07585	Decorin	45.345	Up	0.0174386	DCN	30.1	39.746	232.11	46	10	9	1	2	5	6	20	12	2	5	9	9	10	10	2	4	8	8	9	9	3435200	21371000	21981000	284750000	2299500000	1033400000	0.006	0.035	0.104	0.468	3.338	2.769

## Sheet: UP-cell growth
GO Terms Level 1	GO Terms ID	GO Terms Level	GO Terms Description	Fisher's exact test P value	Protein accession	Protein description	Ratio	Regulated Type	P value	Gene name	Sequence coverage [%]	Mol. weight [kDa]	Score	MS/MS Counts	Peptides	Unique peptides	MS/MS Count E1	MS/MS Count E2	MS/MS Count E3	MS/MS Count M1	MS/MS Count M2	MS/MS Count M3	Peptides E1	Peptides E2	Peptides E3	Peptides M1	Peptides M2	Peptides M3	Unique peptides E1	Unique peptides E2	Unique peptides E3	Unique peptides M1	Unique peptides M2	Unique peptides M3	iBAQ E1	iBAQ E2	iBAQ E3	iBAQ M1	iBAQ M2	iBAQ M3	E1	E2	E3	M1	M2	M3
Biological Process	GO:0001558	6	regulation of cell growth	0.000532875	O14786	Neuropilin-1	13.08	Up	0.0148198	NRP1	9.2	103.13	64.877	11	6	6	1	0	1	1	4	4	1	1	1	3	6	5	1	1	1	3	6	5	126450	248210	86880	757100	3121500	2859100	0.112	0.204	0.207	0.634	2.307	3.9
Biological Process	GO:0001558	6	regulation of cell growth	0.000532875	Q92743	Serine protease HTRA1	142.747	Up	0.0025383	HTRA1	30.8	51.286	73.421	38	11	11	1	0	0	10	17	10	1	0	2	11	11	9	1	0	2	11	11	9	228840	0	294860	62973000	116070000	46017000	0.005		0.02	1.403	2.281	1.669
Biological Process	GO:0001558	6	regulation of cell growth	0.000532875	P08476	Inhibin beta A chain	24.045	Up	0.027082	INHBA	27.9	47.442	105.8	37	10	10	2	1	0	15	13	6	4	2	2	10	10	7	4	2	2	10	10	7	1176200	1032900	392470	51990000	22598000	5842500	0.091	0.074	0.081	3.776	1.448	0.691
Biological Process	GO:0001558	6	regulation of cell growth	0.000532875	P50281	Matrix metalloproteinase-14	6.248	Up	0.033159	MMP14	4.3	65.893	17.655	4	2	2	1	0	1	1	1	0	1	0	1	1	2	0	1	0	1	1	2	0	560520	0	338470	3749200	6850500	0	0.208		0.34	1.311	2.113
Biological Process	GO:0001558	6	regulation of cell growth	0.000532875	Q08629	Testican-1	66.774	Up	0.0048835	SPOCK1	40.1	49.124	139.54	49	15	15	0	1	1	13	24	10	2	5	2	13	15	13	2	5	2	13	15	13	781440	3773900	122840	48510000	200270000	59872000	0.016	0.071	0.006	0.934	3.4	1.876
Biological Process	GO:0001558	6	regulation of cell growth	0.000532875	P46821	Microtubule-associated protein 1B	4.466	Up	0.0055964	MAP1B	7.3	270.63	51.578	50	15	14	9	7	4	15	12	3	11	9	7	13	13	6	10	8	6	12	12	5	1003200	1773700	510480	7764700	4346500	4583900	0.321	0.526	0.441	2.343	1.157	2.252
Biological Process	GO:0001558	6	regulation of cell growth	0.000532875	Q16270	Insulin-like growth factor-binding protein 7	5.991	Up	0.028475	IGFBP7	44.7	29.13	227.15	66	11	11	11	5	5	23	10	12	11	6	5	11	9	10	11	6	5	11	9	10	177140000	34606000	25566000	954020000	395400000	287500000	0.605	0.11	0.236	3.069	1.122	1.506
Biological Process	GO:0001558	6	regulation of cell growth	0.000532875	P07093	Glia-derived nexin	11.771	Up	0.0067036	SERPINE2	46.2	44.002	169.23	127	17	17	12	5	6	33	47	24	12	9	9	16	16	14	12	9	9	16	16	14	132430000	37889000	41650000	871260000	2057200000	504660000	0.233	0.061	0.199	1.441	3.002	1.36
Biological Process	GO:0001558	6	regulation of cell growth	0.000532875	P22692	Insulin-like growth factor-binding protein 4	17.813	Up	0.0086171	IGFBP4	38.8	27.934	98.133	67	9	9	4	6	3	15	20	19	6	5	5	8	8	9	6	5	5	8	8	9	36356000	28060000	17389000	217170000	582750000	818450000	0.137	0.098	0.176	0.77	1.824	4.727
Biological Process	GO:0001558	6	regulation of cell growth	0.000532875	O00622	Protein CYR61	7.006	Up	0.027799	CYR61	27.3	42.026	33.987	23	8	8	3	2	2	8	5	3	5	2	3	7	6	5	5	2	3	7	6	5	7543100	2060100	876710	48582000	13641000	16819000	0.54	0.136	0.17	3.272	0.81	1.845
Biological Process	GO:0010721	7	negative regulation of cell development	0.0344337	O14786	Neuropilin-1	13.08	Up	0.0148198	NRP1	9.2	103.13	64.877	11	6	6	1	0	1	1	4	4	1	1	1	3	6	5	1	1	1	3	6	5	126450	248210	86880	757100	3121500	2859100	0.112	0.204	0.207	0.634	2.307	3.9
Biological Process	GO:0010721	7	negative regulation of cell development	0.0344337	Q15063	Periostin	16.047	Up	0.031338	POSTN	48.9	93.313	323.31	109	31	13	0	15	1	22	42	29	5	23	5	28	31	28	1	10	1	11	13	11	1390500	63201000	1462900	154150000	583880000	255670000	0.009	0.353	0.023	0.877	2.931	2.37
Biological Process	GO:0010721	7	negative regulation of cell development	0.0344337	P09382	Galectin-1	3.787	Up	0.00191859	LGALS1	64.4	14.716	282.85	94	8	8	15	18	8	17	19	17	7	8	6	8	8	8	7	8	6	8	8	8	273840000	282090000	69357000	724230000	1303200000	632750000	0.534	0.508	0.366	1.33	2.11	1.892
Biological Process	GO:0010721	7	negative regulation of cell development	0.0344337	Q08629	Testican-1	66.774	Up	0.0048835	SPOCK1	40.1	49.124	139.54	49	15	15	0	1	1	13	24	10	2	5	2	13	15	13	2	5	2	13	15	13	781440	3773900	122840	48510000	200270000	59872000	0.016	0.071	0.006	0.934	3.4	1.876
Biological Process	GO:0010721	7	negative regulation of cell development	0.0344337	P02461	Collagen alpha-1(III) chain	18.249	Up	0.00135962	COL3A1	55.5	138.56	323.31	349	60	45	21	9	10	97	117	95	28	18	15	56	57	57	18	12	9	42	42	42	57554000	29731000	34116000	850330000	1397000000	817160000	0.115	0.055	0.184	1.609	2.332	2.519
Biological Process	GO:0016331	7	morphogenesis of embryonic epithelium	0.209986	Q96CG8	Collagen triple helix repeat-containing protein 1	20.075	Up	0.00065888	CTHRC1	34.2	26.224	67.085	21	7	7	3	0	0	5	7	6	4	3	2	7	7	5	4	3	2	7	7	5	5132900	5470900	1166300	105070000	144000000	32728000	0.112	0.111	0.069	2.158	2.609	1.095
Biological Process	GO:0016331	7	morphogenesis of embryonic epithelium	0.209986	P62081	40S ribosomal protein S7	1.999	Up	0.039161	RPS7	11.3	22.127	7.5817	10	1	1	3	2	1	1	1	2	1	1	1	1	1	1	1	1	1	1	1	1	1194800	990110	493130	1619000	3003300	1871400	0.835	0.64	0.931	1.064	1.742	2.003
Biological Process	GO:0001936	7	regulation of endothelial cell proliferation	0.278017	O14786	Neuropilin-1	13.08	Up	0.0148198	NRP1	9.2	103.13	64.877	11	6	6	1	0	1	1	4	4	1	1	1	3	6	5	1	1	1	3	6	5	126450	248210	86880	757100	3121500	2859100	0.112	0.204	0.207	0.634	2.307	3.9
Biological Process	GO:0001936	7	regulation of endothelial cell proliferation	0.278017	Q969H8	Myeloid-derived growth factor	6.651	Up	0.043878	MYDGF	24.9	18.795	41.03	12	3	3	0	0	0	3	5	4	1	2	1	3	3	3	1	2	1	3	3	3	1685700	7326800	159080	13437000	31893000	13028000	0.16	0.643	0.04	1.2	2.512	1.895
Biological Process	GO:0060562	7	epithelial tube morphogenesis	0.0126988	O14786	Neuropilin-1	13.08	Up	0.0148198	NRP1	9.2	103.13	64.877	11	6	6	1	0	1	1	4	4	1	1	1	3	6	5	1	1	1	3	6	5	126450	248210	86880	757100	3121500	2859100	0.112	0.204	0.207	0.634	2.307	3.9
Biological Process	GO:0060562	7	epithelial tube morphogenesis	0.0126988	Q96CG8	Collagen triple helix repeat-containing protein 1	20.075	Up	0.00065888	CTHRC1	34.2	26.224	67.085	21	7	7	3	0	0	5	7	6	4	3	2	7	7	5	4	3	2	7	7	5	5132900	5470900	1166300	105070000	144000000	32728000	0.112	0.111	0.069	2.158	2.609	1.095
Biological Process	GO:0060562	7	epithelial tube morphogenesis	0.0126988	P02462	Collagen alpha-1(IV) chain	12.585	Up	0.0074763	COL4A1	7.3	160.61	38.958	27	8	5	1	1	0	11	8	6	2	1	2	7	7	6	0	0	0	4	5	4	1384800	707960	416020	14184000	16730000	8212900	0.213	0.101	0.173	2.054	2.137	1.938
Biological Process	GO:0060562	7	epithelial tube morphogenesis	0.0126988	P50281	Matrix metalloproteinase-14	6.248	Up	0.033159	MMP14	4.3	65.893	17.655	4	2	2	1	0	1	1	1	0	1	0	1	1	2	0	1	0	1	1	2	0	560520	0	338470	3749200	6850500	0	0.208		0.34	1.311	2.113
Biological Process	GO:0060562	7	epithelial tube morphogenesis	0.0126988	P62081	40S ribosomal protein S7	1.999	Up	0.039161	RPS7	11.3	22.127	7.5817	10	1	1	3	2	1	1	1	2	1	1	1	1	1	1	1	1	1	1	1	1	1194800	990110	493130	1619000	3003300	1871400	0.835	0.64	0.931	1.064	1.742	2.003
Biological Process	GO:0008284	6	positive regulation of cell proliferation	0.112987	O14786	Neuropilin-1	13.08	Up	0.0148198	NRP1	9.2	103.13	64.877	11	6	6	1	0	1	1	4	4	1	1	1	3	6	5	1	1	1	3	6	5	126450	248210	86880	757100	3121500	2859100	0.112	0.204	0.207	0.634	2.307	3.9
Biological Process	GO:0008284	6	positive regulation of cell proliferation	0.112987	Q96CG8	Collagen triple helix repeat-containing protein 1	20.075	Up	0.00065888	CTHRC1	34.2	26.224	67.085	21	7	7	3	0	0	5	7	6	4	3	2	7	7	5	4	3	2	7	7	5	5132900	5470900	1166300	105070000	144000000	32728000	0.112	0.111	0.069	2.158	2.609	1.095
Biological Process	GO:0008284	6	positive regulation of cell proliferation	0.112987	Q92743	Serine protease HTRA1	142.747	Up	0.0025383	HTRA1	30.8	51.286	73.421	38	11	11	1	0	0	10	17	10	1	0	2	11	11	9	1	0	2	11	11	9	228840	0	294860	62973000	116070000	46017000	0.005		0.02	1.403	2.281	1.669
Biological Process	GO:0008284	6	positive regulation of cell proliferation	0.112987	Q969H8	Myeloid-derived growth factor	6.651	Up	0.043878	MYDGF	24.9	18.795	41.03	12	3	3	0	0	0	3	5	4	1	2	1	3	3	3	1	2	1	3	3	3	1685700	7326800	159080	13437000	31893000	13028000	0.16	0.643	0.04	1.2	2.512	1.895
Biological Process	GO:0008284	6	positive regulation of cell proliferation	0.112987	Q9GZP0	Platelet-derived growth factor D	16.251	Up	0.0095559	PDGFD	13.2	42.848	9.1286	11	4	4	1	0	1	2	2	5	1	1	1	3	3	4	1	1	1	3	3	4	175330	1553700	111740	11601000	7599100	8976200	0.037	0.307	0.063	2.331	1.347	2.936
Biological Process	GO:0008284	6	positive regulation of cell proliferation	0.112987	P15104	Glutamine synthetase	2.042	Up	0.039323	GLUL	17.4	42.064	27.278	22	5	5	2	4	2	4	6	4	2	2	2	4	5	4	2	2	2	4	5	4	2199100	3483100	1714300	7512500	6435700	5277300	0.529	0.775	1.112	1.702	1.285	1.946
Biological Process	GO:0008284	6	positive regulation of cell proliferation	0.112987	P01033	Metalloproteinase inhibitor 1	25.345	Up	0.0029956	TIMP1	45.4	23.171	295.74	105	7	7	7	8	7	23	36	24	6	5	7	7	7	7	6	5	7	7	7	7	123160000	233850000	201930000	5162900000	14404000000	3598700000	0.033	0.058	0.147	1.313	3.23	1.489
Biological Process	GO:0008284	6	positive regulation of cell proliferation	0.112987	O00622	Protein CYR61	7.006	Up	0.027799	CYR61	27.3	42.026	33.987	23	8	8	3	2	2	8	5	3	5	2	3	7	6	5	5	2	3	7	6	5	7543100	2060100	876710	48582000	13641000	16819000	0.54	0.136	0.17	3.272	0.81	1.845
Biological Process	GO:0060485	7	mesenchyme development	0.328994	O14786	Neuropilin-1	13.08	Up	0.0148198	NRP1	9.2	103.13	64.877	11	6	6	1	0	1	1	4	4	1	1	1	3	6	5	1	1	1	3	6	5	126450	248210	86880	757100	3121500	2859100	0.112	0.204	0.207	0.634	2.307	3.9
Biological Process	GO:0060485	7	mesenchyme development	0.328994	Q9Y4K0	Lysyl oxidase homolog 2	97.971	Up	0.00178461	LOXL2	39.8	86.724	323.31	106	26	26	2	0	0	33	40	31	3	3	1	25	26	24	3	3	1	25	26	24	666620	5011100	1170400	194120000	312420000	232340000	0.005	0.039	0.026	1.57	2.229	3.059
Biological Process	GO:0050793	4	regulation of developmental process	0.000644682	O14786	Neuropilin-1	13.08	Up	0.0148198	NRP1	9.2	103.13	64.877	11	6	6	1	0	1	1	4	4	1	1	1	3	6	5	1	1	1	3	6	5	126450	248210	86880	757100	3121500	2859100	0.112	0.204	0.207	0.634	2.307	3.9
Biological Process	GO:0050793	4	regulation of developmental process	0.000644682	Q9Y4K0	Lysyl oxidase homolog 2	97.971	Up	0.00178461	LOXL2	39.8	86.724	323.31	106	26	26	2	0	0	33	40	31	3	3	1	25	26	24	3	3	1	25	26	24	666620	5011100	1170400	194120000	312420000	232340000	0.005	0.039	0.026	1.57	2.229	3.059
Biological Process	GO:0050793	4	regulation of developmental process	0.000644682	P35052	Glypican-1	6.895	Up	0.0086422	GPC1	12.9	61.68	23.613	12	5	5	0	0	0	4	3	5	2	1	1	4	5	4	2	1	1	4	5	4	724470	242550	240590	2585200	5283300	2729100	0.393	0.121	0.352	1.321	2.38	2.27
Biological Process	GO:0050793	4	regulation of developmental process	0.000644682	P36955	Pigment epithelium-derived factor	5.022	Up	0.042517	SERPINF1	31.1	46.312	90.643	59	13	9	6	4	5	13	17	14	5	6	5	11	12	12	1	2	1	7	8	8	24428000	22346000	22355000	75787000	187740000	197270000	0.296	0.25	0.729	0.862	1.885	3.656
Biological Process	GO:0050793	4	regulation of developmental process	0.000644682	Q969H8	Myeloid-derived growth factor	6.651	Up	0.043878	MYDGF	24.9	18.795	41.03	12	3	3	0	0	0	3	5	4	1	2	1	3	3	3	1	2	1	3	3	3	1685700	7326800	159080	13437000	31893000	13028000	0.16	0.643	0.04	1.2	2.512	1.895
Biological Process	GO:0050793	4	regulation of developmental process	0.000644682	Q9Y215	Acetylcholinesterase collagenic tail peptide	7.717	Up	0.00164032	COLQ	4.6	47.766	1.6263	6	2	2	1	1	0	1	1	2	1	1	1	2	2	2	1	1	1	2	2	2	8428700	7833500	6439400	85794000	93236000	63641000	0.204	0.175	0.421	1.95	1.869	2.355
Biological Process	GO:0050793	4	regulation of developmental process	0.000644682	P50281	Matrix metalloproteinase-14	6.248	Up	0.033159	MMP14	4.3	65.893	17.655	4	2	2	1	0	1	1	1	0	1	0	1	1	2	0	1	0	1	1	2	0	560520	0	338470	3749200	6850500	0	0.208		0.34	1.311	2.113
Biological Process	GO:0050793	4	regulation of developmental process	0.000644682	Q08629	Testican-1	66.774	Up	0.0048835	SPOCK1	40.1	49.124	139.54	49	15	15	0	1	1	13	24	10	2	5	2	13	15	13	2	5	2	13	15	13	781440	3773900	122840	48510000	200270000	59872000	0.016	0.071	0.006	0.934	3.4	1.876
Biological Process	GO:0050793	4	regulation of developmental process	0.000644682	P46821	Microtubule-associated protein 1B	4.466	Up	0.0055964	MAP1B	7.3	270.63	51.578	50	15	14	9	7	4	15	12	3	11	9	7	13	13	6	10	8	6	12	12	5	1003200	1773700	510480	7764700	4346500	4583900	0.321	0.526	0.441	2.343	1.157	2.252
Biological Process	GO:0050793	4	regulation of developmental process	0.000644682	P02461	Collagen alpha-1(III) chain	18.249	Up	0.00135962	COL3A1	55.5	138.56	323.31	349	60	45	21	9	10	97	117	95	28	18	15	56	57	57	18	12	9	42	42	42	57554000	29731000	34116000	850330000	1397000000	817160000	0.115	0.055	0.184	1.609	2.332	2.519
Biological Process	GO:0050793	4	regulation of developmental process	0.000644682	P08572	Collagen alpha-2(IV) chain	62.4	Up	1.65779e-05	COL4A2	24.6	167.55	323.31	96	29	29	1	1	0	26	43	25	4	3	2	24	25	22	4	3	2	24	25	22	977530	882140	266530	42672000	70553000	37748000	0.041	0.035	0.029	1.68	2.451	2.421
Biological Process	GO:0050793	4	regulation of developmental process	0.000644682	P07093	Glia-derived nexin	11.771	Up	0.0067036	SERPINE2	46.2	44.002	169.23	127	17	17	12	5	6	33	47	24	12	9	9	16	16	14	12	9	9	16	16	14	132430000	37889000	41650000	871260000	2057200000	504660000	0.233	0.061	0.199	1.441	3.002	1.36
Biological Process	GO:0050793	4	regulation of developmental process	0.000644682	O00622	Protein CYR61	7.006	Up	0.027799	CYR61	27.3	42.026	33.987	23	8	8	3	2	2	8	5	3	5	2	3	7	6	5	5	2	3	7	6	5	7543100	2060100	876710	48582000	13641000	16819000	0.54	0.136	0.17	3.272	0.81	1.845
Biological Process	GO:0050793	4	regulation of developmental process	0.000644682	O60687	Sushi repeat-containing protein SRPX2	19.744	Up	0.039323	SRPX2	33.8	52.971	82.027	42	12	12	1	0	0	13	17	11	4	2	1	12	12	12	4	2	1	12	12	12	5990700	596270	391460	51851000	62309000	32087000	0.251	0.023	0.043	2.04	2.163	2.056
Biological Process	GO:0050793	4	regulation of developmental process	0.000644682	Q96CG8	Collagen triple helix repeat-containing protein 1	20.075	Up	0.00065888	CTHRC1	34.2	26.224	67.085	21	7	7	3	0	0	5	7	6	4	3	2	7	7	5	4	3	2	7	7	5	5132900	5470900	1166300	105070000	144000000	32728000	0.112	0.111	0.069	2.158	2.609	1.095
Biological Process	GO:0050793	4	regulation of developmental process	0.000644682	P35579	Myosin-9	2.091	Up	0.042662	MYH9	33.2	226.53	323.31	219	57	45	38	21	11	44	74	31	41	36	21	48	55	43	33	30	19	38	45	35	14494000	8704600	4148000	18023000	38284000	14179000	0.949	0.527	0.732	1.111	2.082	1.424
Biological Process	GO:0050793	4	regulation of developmental process	0.000644682	P09382	Galectin-1	3.787	Up	0.00191859	LGALS1	64.4	14.716	282.85	94	8	8	15	18	8	17	19	17	7	8	6	8	8	8	7	8	6	8	8	8	273840000	282090000	69357000	724230000	1303200000	632750000	0.534	0.508	0.366	1.33	2.11	1.892
Biological Process	GO:0050793	4	regulation of developmental process	0.000644682	Q9GZP0	Platelet-derived growth factor D	16.251	Up	0.0095559	PDGFD	13.2	42.848	9.1286	11	4	4	1	0	1	2	2	5	1	1	1	3	3	4	1	1	1	3	3	4	175330	1553700	111740	11601000	7599100	8976200	0.037	0.307	0.063	2.331	1.347	2.936
Biological Process	GO:0050793	4	regulation of developmental process	0.000644682	P08476	Inhibin beta A chain	24.045	Up	0.027082	INHBA	27.9	47.442	105.8	37	10	10	2	1	0	15	13	6	4	2	2	10	10	7	4	2	2	10	10	7	1176200	1032900	392470	51990000	22598000	5842500	0.091	0.074	0.081	3.776	1.448	0.691
Biological Process	GO:0050793	4	regulation of developmental process	0.000644682	Q12805	EGF-containing fibulin-like extracellular matrix protein 1	5.953	Up	0.033317	EFEMP1	39.6	54.64	243.48	42	14	14	2	4	6	9	9	12	5	4	8	11	11	12	5	4	8	11	11	12	2917100	2877500	4660100	20180000	33838000	39672000	0.179	0.164	0.772	1.169	1.728	3.741
Biological Process	GO:0050793	4	regulation of developmental process	0.000644682	P23284	Peptidyl-prolyl cis-trans isomerase B	1.886	Up	0.049863	PPIB	47.7	23.742	119.2	59	10	10	7	7	7	14	11	13	9	8	9	10	10	10	9	8	9	10	10	10	106300000	193780000	67625000	236290000	348430000	242220000	0.57	0.961	0.98	1.193	1.551	1.992
Biological Process	GO:0050793	4	regulation of developmental process	0.000644682	P01024	Complement C3	63.787	Up	0.044438	C3	35.5	187.15	289.83	92	48	39	0	0	0	26	18	48	12	9	10	36	32	47	3	0	1	27	23	38	224670	0	216400	11599000	4975900	41408000	0.02		0.055	0.998	0.378	5.8
Biological Process	GO:0050793	4	regulation of developmental process	0.000644682	P19022	Cadherin-2	10.125	Up	0.020937	CDH2	12.1	99.808	74.261	38	9	9	1	5	0	15	10	7	2	4	0	8	9	5	2	4	0	8	9	5	710180	2890000	0	22514000	22758000	7325000	0.067	0.254		2.013	1.795	1.067
Biological Process	GO:0050793	4	regulation of developmental process	0.000644682	Q15063	Periostin	16.047	Up	0.031338	POSTN	48.9	93.313	323.31	109	31	13	0	15	1	22	42	29	5	23	5	28	31	28	1	10	1	11	13	11	1390500	63201000	1462900	154150000	583880000	255670000	0.009	0.353	0.023	0.877	2.931	2.37
Biological Process	GO:0050793	4	regulation of developmental process	0.000644682	P01033	Metalloproteinase inhibitor 1	25.345	Up	0.0029956	TIMP1	45.4	23.171	295.74	105	7	7	7	8	7	23	36	24	6	5	7	7	7	7	6	5	7	7	7	7	123160000	233850000	201930000	5162900000	14404000000	3598700000	0.033	0.058	0.147	1.313	3.23	1.489
Biological Process	GO:0050793	4	regulation of developmental process	0.000644682	P05121	Plasminogen activator inhibitor 1	2.572	Up	0.0112754	SERPINE1	49.3	45.059	323.31	290	20	20	41	44	24	75	56	50	18	19	18	20	20	19	18	19	18	20	20	19	696760000	1081900000	342880000	3286900000	2170100000	1205400000	0.508	0.73	0.674	2.256	1.314	1.347
Biological Process	GO:0050793	4	regulation of developmental process	0.000644682	P07585	Decorin	45.345	Up	0.0174386	DCN	30.1	39.746	232.11	46	10	9	1	2	5	6	20	12	2	5	9	9	10	10	2	4	8	8	9	9	3435200	21371000	21981000	284750000	2299500000	1033400000	0.006	0.035	0.104	0.468	3.338	2.769
Biological Process	GO:0050673	4	epithelial cell proliferation	0.0323354	Q9Y4K0	Lysyl oxidase homolog 2	97.971	Up	0.00178461	LOXL2	39.8	86.724	323.31	106	26	26	2	0	0	33	40	31	3	3	1	25	26	24	3	3	1	25	26	24	666620	5011100	1170400	194120000	312420000	232340000	0.005	0.039	0.026	1.57	2.229	3.059
Biological Process	GO:0050673	4	epithelial cell proliferation	0.0323354	P50281	Matrix metalloproteinase-14	6.248	Up	0.033159	MMP14	4.3	65.893	17.655	4	2	2	1	0	1	1	1	0	1	0	1	1	2	0	1	0	1	1	2	0	560520	0	338470	3749200	6850500	0	0.208		0.34	1.311	2.113
Biological Process	GO:0050673	4	epithelial cell proliferation	0.0323354	P22692	Insulin-like growth factor-binding protein 4	17.813	Up	0.0086171	IGFBP4	38.8	27.934	98.133	67	9	9	4	6	3	15	20	19	6	5	5	8	8	9	6	5	5	8	8	9	36356000	28060000	17389000	217170000	582750000	818450000	0.137	0.098	0.176	0.77	1.824	4.727
Biological Process	GO:0050678	6	regulation of epithelial cell proliferation	0.0814243	O14786	Neuropilin-1	13.08	Up	0.0148198	NRP1	9.2	103.13	64.877	11	6	6	1	0	1	1	4	4	1	1	1	3	6	5	1	1	1	3	6	5	126450	248210	86880	757100	3121500	2859100	0.112	0.204	0.207	0.634	2.307	3.9
Biological Process	GO:0050678	6	regulation of epithelial cell proliferation	0.0814243	Q92743	Serine protease HTRA1	142.747	Up	0.0025383	HTRA1	30.8	51.286	73.421	38	11	11	1	0	0	10	17	10	1	0	2	11	11	9	1	0	2	11	11	9	228840	0	294860	62973000	116070000	46017000	0.005		0.02	1.403	2.281	1.669
Biological Process	GO:0050678	6	regulation of epithelial cell proliferation	0.0814243	P36955	Pigment epithelium-derived factor	5.022	Up	0.042517	SERPINF1	31.1	46.312	90.643	59	13	9	6	4	5	13	17	14	5	6	5	11	12	12	1	2	1	7	8	8	24428000	22346000	22355000	75787000	187740000	197270000	0.296	0.25	0.729	0.862	1.885	3.656
Biological Process	GO:0050678	6	regulation of epithelial cell proliferation	0.0814243	Q969H8	Myeloid-derived growth factor	6.651	Up	0.043878	MYDGF	24.9	18.795	41.03	12	3	3	0	0	0	3	5	4	1	2	1	3	3	3	1	2	1	3	3	3	1685700	7326800	159080	13437000	31893000	13028000	0.16	0.643	0.04	1.2	2.512	1.895
Biological Process	GO:0050678	6	regulation of epithelial cell proliferation	0.0814243	P15104	Glutamine synthetase	2.042	Up	0.039323	GLUL	17.4	42.064	27.278	22	5	5	2	4	2	4	6	4	2	2	2	4	5	4	2	2	2	4	5	4	2199100	3483100	1714300	7512500	6435700	5277300	0.529	0.775	1.112	1.702	1.285	1.946
Biological Process	GO:0042127	5	regulation of cell proliferation	0.00173532	O14786	Neuropilin-1	13.08	Up	0.0148198	NRP1	9.2	103.13	64.877	11	6	6	1	0	1	1	4	4	1	1	1	3	6	5	1	1	1	3	6	5	126450	248210	86880	757100	3121500	2859100	0.112	0.204	0.207	0.634	2.307	3.9
Biological Process	GO:0042127	5	regulation of cell proliferation	0.00173532	Q92743	Serine protease HTRA1	142.747	Up	0.0025383	HTRA1	30.8	51.286	73.421	38	11	11	1	0	0	10	17	10	1	0	2	11	11	9	1	0	2	11	11	9	228840	0	294860	62973000	116070000	46017000	0.005		0.02	1.403	2.281	1.669
Biological Process	GO:0042127	5	regulation of cell proliferation	0.00173532	P36955	Pigment epithelium-derived factor	5.022	Up	0.042517	SERPINF1	31.1	46.312	90.643	59	13	9	6	4	5	13	17	14	5	6	5	11	12	12	1	2	1	7	8	8	24428000	22346000	22355000	75787000	187740000	197270000	0.296	0.25	0.729	0.862	1.885	3.656
Biological Process	GO:0042127	5	regulation of cell proliferation	0.00173532	Q969H8	Myeloid-derived growth factor	6.651	Up	0.043878	MYDGF	24.9	18.795	41.03	12	3	3	0	0	0	3	5	4	1	2	1	3	3	3	1	2	1	3	3	3	1685700	7326800	159080	13437000	31893000	13028000	0.16	0.643	0.04	1.2	2.512	1.895
Biological Process	GO:0042127	5	regulation of cell proliferation	0.00173532	P07093	Glia-derived nexin	11.771	Up	0.0067036	SERPINE2	46.2	44.002	169.23	127	17	17	12	5	6	33	47	24	12	9	9	16	16	14	12	9	9	16	16	14	132430000	37889000	41650000	871260000	2057200000	504660000	0.233	0.061	0.199	1.441	3.002	1.36
Biological Process	GO:0042127	5	regulation of cell proliferation	0.00173532	O00622	Protein CYR61	7.006	Up	0.027799	CYR61	27.3	42.026	33.987	23	8	8	3	2	2	8	5	3	5	2	3	7	6	5	5	2	3	7	6	5	7543100	2060100	876710	48582000	13641000	16819000	0.54	0.136	0.17	3.272	0.81	1.845
Biological Process	GO:0042127	5	regulation of cell proliferation	0.00173532	P78539	Sushi repeat-containing protein SRPX	27.971	Up	0.027542	SRPX	27.6	51.571	48.838	24	12	12	0	0	0	5	6	13	1	3	1	8	10	11	1	3	1	8	10	11	107670	963960	1391300	21900000	26418000	58346000	0.006	0.052	0.219	1.21	1.288	5.25
Biological Process	GO:0042127	5	regulation of cell proliferation	0.00173532	P19876	C-X-C motif chemokine 3	33.42	Up	0.0195594	CXCL3	45.8	11.342	59.848	12	4	3	0	1	0	2	3	6	1	2	1	4	4	4	1	2	1	3	3	3	1342600	519640	735400	17964000	11262000	66575000	0.088	0.032	0.13	1.101	0.609	6.645
Biological Process	GO:0042127	5	regulation of cell proliferation	0.00173532	Q32P28	Prolyl 3-hydroxylase 1	5.306	Up	0.033521	P3H1	12.2	83.393	47.658	20	7	7	0	1	0	8	6	5	2	4	0	6	6	6	2	4	0	6	6	6	505290	1962600	0	5456900	8767200	3942100	0.13	0.47		1.329	1.883	1.563
Biological Process	GO:0042127	5	regulation of cell proliferation	0.00173532	Q96CG8	Collagen triple helix repeat-containing protein 1	20.075	Up	0.00065888	CTHRC1	34.2	26.224	67.085	21	7	7	3	0	0	5	7	6	4	3	2	7	7	5	4	3	2	7	7	5	5132900	5470900	1166300	105070000	144000000	32728000	0.112	0.111	0.069	2.158	2.609	1.095
Biological Process	GO:0042127	5	regulation of cell proliferation	0.00173532	Q9GZP0	Platelet-derived growth factor D	16.251	Up	0.0095559	PDGFD	13.2	42.848	9.1286	11	4	4	1	0	1	2	2	5	1	1	1	3	3	4	1	1	1	3	3	4	175330	1553700	111740	11601000	7599100	8976200	0.037	0.307	0.063	2.331	1.347	2.936
Biological Process	GO:0042127	5	regulation of cell proliferation	0.00173532	P08476	Inhibin beta A chain	24.045	Up	0.027082	INHBA	27.9	47.442	105.8	37	10	10	2	1	0	15	13	6	4	2	2	10	10	7	4	2	2	10	10	7	1176200	1032900	392470	51990000	22598000	5842500	0.091	0.074	0.081	3.776	1.448	0.691
Biological Process	GO:0042127	5	regulation of cell proliferation	0.00173532	P19022	Cadherin-2	10.125	Up	0.020937	CDH2	12.1	99.808	74.261	38	9	9	1	5	0	15	10	7	2	4	0	8	9	5	2	4	0	8	9	5	710180	2890000	0	22514000	22758000	7325000	0.067	0.254		2.013	1.795	1.067
Biological Process	GO:0042127	5	regulation of cell proliferation	0.00173532	P15104	Glutamine synthetase	2.042	Up	0.039323	GLUL	17.4	42.064	27.278	22	5	5	2	4	2	4	6	4	2	2	2	4	5	4	2	2	2	4	5	4	2199100	3483100	1714300	7512500	6435700	5277300	0.529	0.775	1.112	1.702	1.285	1.946
Biological Process	GO:0042127	5	regulation of cell proliferation	0.00173532	Q16270	Insulin-like growth factor-binding protein 7	5.991	Up	0.028475	IGFBP7	44.7	29.13	227.15	66	11	11	11	5	5	23	10	12	11	6	5	11	9	10	11	6	5	11	9	10	177140000	34606000	25566000	954020000	395400000	287500000	0.605	0.11	0.236	3.069	1.122	1.506
Biological Process	GO:0042127	5	regulation of cell proliferation	0.00173532	Q9UHI8	A disintegrin and metalloproteinase with thrombospondin motifs 1	10.404	Up	0.041423	ADAMTS1	33.7	105.36	323.31	56	19	19	0	0	0	5	35	16	2	2	2	8	19	12	2	2	2	8	19	12	2875500	4354800	1653600	7932800	76625000	30707000	0.148	0.207	0.231	0.385	3.283	2.429
Biological Process	GO:0042127	5	regulation of cell proliferation	0.00173532	P01033	Metalloproteinase inhibitor 1	25.345	Up	0.0029956	TIMP1	45.4	23.171	295.74	105	7	7	7	8	7	23	36	24	6	5	7	7	7	7	6	5	7	7	7	7	123160000	233850000	201930000	5162900000	14404000000	3598700000	0.033	0.058	0.147	1.313	3.23	1.489
Biological Process	GO:0042127	5	regulation of cell proliferation	0.00173532	P04179	"Superoxide dismutase [Mn], mitochondrial"	2.098	Up	0.048243	SOD2	13.1	24.75	5.8097	10	3	3	1	1	1	2	2	3	2	1	1	3	3	3	2	1	1	3	3	3	14977000	22198000	4341500	24498000	36160000	30011000	0.726	0.995	0.568	1.118	1.455	2.229
Biological Process	GO:0048588	7	developmental cell growth	0.0182031	O14786	Neuropilin-1	13.08	Up	0.0148198	NRP1	9.2	103.13	64.877	11	6	6	1	0	1	1	4	4	1	1	1	3	6	5	1	1	1	3	6	5	126450	248210	86880	757100	3121500	2859100	0.112	0.204	0.207	0.634	2.307	3.9
Biological Process	GO:0048588	7	developmental cell growth	0.0182031	Q15063	Periostin	16.047	Up	0.031338	POSTN	48.9	93.313	323.31	109	31	13	0	15	1	22	42	29	5	23	5	28	31	28	1	10	1	11	13	11	1390500	63201000	1462900	154150000	583880000	255670000	0.009	0.353	0.023	0.877	2.931	2.37
Biological Process	GO:0048588	7	developmental cell growth	0.0182031	P46821	Microtubule-associated protein 1B	4.466	Up	0.0055964	MAP1B	7.3	270.63	51.578	50	15	14	9	7	4	15	12	3	11	9	7	13	13	6	10	8	6	12	12	5	1003200	1773700	510480	7764700	4346500	4583900	0.321	0.526	0.441	2.343	1.157	2.252
Biological Process	GO:0048639	6	positive regulation of developmental growth	0.0816785	O14786	Neuropilin-1	13.08	Up	0.0148198	NRP1	9.2	103.13	64.877	11	6	6	1	0	1	1	4	4	1	1	1	3	6	5	1	1	1	3	6	5	126450	248210	86880	757100	3121500	2859100	0.112	0.204	0.207	0.634	2.307	3.9
Biological Process	GO:0048639	6	positive regulation of developmental growth	0.0816785	P23284	Peptidyl-prolyl cis-trans isomerase B	1.886	Up	0.049863	PPIB	47.7	23.742	119.2	59	10	10	7	7	7	14	11	13	9	8	9	10	10	10	9	8	9	10	10	10	106300000	193780000	67625000	236290000	348430000	242220000	0.57	0.961	0.98	1.193	1.551	1.992
Biological Process	GO:0048639	6	positive regulation of developmental growth	0.0816785	P46821	Microtubule-associated protein 1B	4.466	Up	0.0055964	MAP1B	7.3	270.63	51.578	50	15	14	9	7	4	15	12	3	11	9	7	13	13	6	10	8	6	12	12	5	1003200	1773700	510480	7764700	4346500	4583900	0.321	0.526	0.441	2.343	1.157	2.252
Biological Process	GO:0030307	7	positive regulation of cell growth	0.128969	O14786	Neuropilin-1	13.08	Up	0.0148198	NRP1	9.2	103.13	64.877	11	6	6	1	0	1	1	4	4	1	1	1	3	6	5	1	1	1	3	6	5	126450	248210	86880	757100	3121500	2859100	0.112	0.204	0.207	0.634	2.307	3.9
Biological Process	GO:0030307	7	positive regulation of cell growth	0.128969	P50281	Matrix metalloproteinase-14	6.248	Up	0.033159	MMP14	4.3	65.893	17.655	4	2	2	1	0	1	1	1	0	1	0	1	1	2	0	1	0	1	1	2	0	560520	0	338470	3749200	6850500	0	0.208		0.34	1.311	2.113
Biological Process	GO:0030307	7	positive regulation of cell growth	0.128969	P46821	Microtubule-associated protein 1B	4.466	Up	0.0055964	MAP1B	7.3	270.63	51.578	50	15	14	9	7	4	15	12	3	11	9	7	13	13	6	10	8	6	12	12	5	1003200	1773700	510480	7764700	4346500	4583900	0.321	0.526	0.441	2.343	1.157	2.252
Biological Process	GO:0050679	7	positive regulation of epithelial cell proliferation	0.0343986	O14786	Neuropilin-1	13.08	Up	0.0148198	NRP1	9.2	103.13	64.877	11	6	6	1	0	1	1	4	4	1	1	1	3	6	5	1	1	1	3	6	5	126450	248210	86880	757100	3121500	2859100	0.112	0.204	0.207	0.634	2.307	3.9
Biological Process	GO:0050679	7	positive regulation of epithelial cell proliferation	0.0343986	Q92743	Serine protease HTRA1	142.747	Up	0.0025383	HTRA1	30.8	51.286	73.421	38	11	11	1	0	0	10	17	10	1	0	2	11	11	9	1	0	2	11	11	9	228840	0	294860	62973000	116070000	46017000	0.005		0.02	1.403	2.281	1.669
Biological Process	GO:0050679	7	positive regulation of epithelial cell proliferation	0.0343986	Q969H8	Myeloid-derived growth factor	6.651	Up	0.043878	MYDGF	24.9	18.795	41.03	12	3	3	0	0	0	3	5	4	1	2	1	3	3	3	1	2	1	3	3	3	1685700	7326800	159080	13437000	31893000	13028000	0.16	0.643	0.04	1.2	2.512	1.895
Biological Process	GO:0050679	7	positive regulation of epithelial cell proliferation	0.0343986	P15104	Glutamine synthetase	2.042	Up	0.039323	GLUL	17.4	42.064	27.278	22	5	5	2	4	2	4	6	4	2	2	2	4	5	4	2	2	2	4	5	4	2199100	3483100	1714300	7512500	6435700	5277300	0.529	0.775	1.112	1.702	1.285	1.946
Biological Process	GO:0051093	5	negative regulation of developmental process	0.00216298	O14786	Neuropilin-1	13.08	Up	0.0148198	NRP1	9.2	103.13	64.877	11	6	6	1	0	1	1	4	4	1	1	1	3	6	5	1	1	1	3	6	5	126450	248210	86880	757100	3121500	2859100	0.112	0.204	0.207	0.634	2.307	3.9
Biological Process	GO:0051093	5	negative regulation of developmental process	0.00216298	P09382	Galectin-1	3.787	Up	0.00191859	LGALS1	64.4	14.716	282.85	94	8	8	15	18	8	17	19	17	7	8	6	8	8	8	7	8	6	8	8	8	273840000	282090000	69357000	724230000	1303200000	632750000	0.534	0.508	0.366	1.33	2.11	1.892
Biological Process	GO:0051093	5	negative regulation of developmental process	0.00216298	P36955	Pigment epithelium-derived factor	5.022	Up	0.042517	SERPINF1	31.1	46.312	90.643	59	13	9	6	4	5	13	17	14	5	6	5	11	12	12	1	2	1	7	8	8	24428000	22346000	22355000	75787000	187740000	197270000	0.296	0.25	0.729	0.862	1.885	3.656
Biological Process	GO:0051093	5	negative regulation of developmental process	0.00216298	P08476	Inhibin beta A chain	24.045	Up	0.027082	INHBA	27.9	47.442	105.8	37	10	10	2	1	0	15	13	6	4	2	2	10	10	7	4	2	2	10	10	7	1176200	1032900	392470	51990000	22598000	5842500	0.091	0.074	0.081	3.776	1.448	0.691
Biological Process	GO:0051093	5	negative regulation of developmental process	0.00216298	Q08629	Testican-1	66.774	Up	0.0048835	SPOCK1	40.1	49.124	139.54	49	15	15	0	1	1	13	24	10	2	5	2	13	15	13	2	5	2	13	15	13	781440	3773900	122840	48510000	200270000	59872000	0.016	0.071	0.006	0.934	3.4	1.876
Biological Process	GO:0051093	5	negative regulation of developmental process	0.00216298	Q12805	EGF-containing fibulin-like extracellular matrix protein 1	5.953	Up	0.033317	EFEMP1	39.6	54.64	243.48	42	14	14	2	4	6	9	9	12	5	4	8	11	11	12	5	4	8	11	11	12	2917100	2877500	4660100	20180000	33838000	39672000	0.179	0.164	0.772	1.169	1.728	3.741
Biological Process	GO:0051093	5	negative regulation of developmental process	0.00216298	P02461	Collagen alpha-1(III) chain	18.249	Up	0.00135962	COL3A1	55.5	138.56	323.31	349	60	45	21	9	10	97	117	95	28	18	15	56	57	57	18	12	9	42	42	42	57554000	29731000	34116000	850330000	1397000000	817160000	0.115	0.055	0.184	1.609	2.332	2.519
Biological Process	GO:0051093	5	negative regulation of developmental process	0.00216298	P08572	Collagen alpha-2(IV) chain	62.4	Up	1.65779e-05	COL4A2	24.6	167.55	323.31	96	29	29	1	1	0	26	43	25	4	3	2	24	25	22	4	3	2	24	25	22	977530	882140	266530	42672000	70553000	37748000	0.041	0.035	0.029	1.68	2.451	2.421
Biological Process	GO:0051093	5	negative regulation of developmental process	0.00216298	Q15063	Periostin	16.047	Up	0.031338	POSTN	48.9	93.313	323.31	109	31	13	0	15	1	22	42	29	5	23	5	28	31	28	1	10	1	11	13	11	1390500	63201000	1462900	154150000	583880000	255670000	0.009	0.353	0.023	0.877	2.931	2.37
Biological Process	GO:0051093	5	negative regulation of developmental process	0.00216298	P05121	Plasminogen activator inhibitor 1	2.572	Up	0.0112754	SERPINE1	49.3	45.059	323.31	290	20	20	41	44	24	75	56	50	18	19	18	20	20	19	18	19	18	20	20	19	696760000	1081900000	342880000	3286900000	2170100000	1205400000	0.508	0.73	0.674	2.256	1.314	1.347
Biological Process	GO:0051093	5	negative regulation of developmental process	0.00216298	P01033	Metalloproteinase inhibitor 1	25.345	Up	0.0029956	TIMP1	45.4	23.171	295.74	105	7	7	7	8	7	23	36	24	6	5	7	7	7	7	6	5	7	7	7	7	123160000	233850000	201930000	5162900000	14404000000	3598700000	0.033	0.058	0.147	1.313	3.23	1.489
Biological Process	GO:0051093	5	negative regulation of developmental process	0.00216298	P07585	Decorin	45.345	Up	0.0174386	DCN	30.1	39.746	232.11	46	10	9	1	2	5	6	20	12	2	5	9	9	10	10	2	4	8	8	9	9	3435200	21371000	21981000	284750000	2299500000	1033400000	0.006	0.035	0.104	0.468	3.338	2.769
Biological Process	GO:0048729	5	tissue morphogenesis	0.0160523	O14786	Neuropilin-1	13.08	Up	0.0148198	NRP1	9.2	103.13	64.877	11	6	6	1	0	1	1	4	4	1	1	1	3	6	5	1	1	1	3	6	5	126450	248210	86880	757100	3121500	2859100	0.112	0.204	0.207	0.634	2.307	3.9
Biological Process	GO:0048729	5	tissue morphogenesis	0.0160523	Q96CG8	Collagen triple helix repeat-containing protein 1	20.075	Up	0.00065888	CTHRC1	34.2	26.224	67.085	21	7	7	3	0	0	5	7	6	4	3	2	7	7	5	4	3	2	7	7	5	5132900	5470900	1166300	105070000	144000000	32728000	0.112	0.111	0.069	2.158	2.609	1.095
Biological Process	GO:0048729	5	tissue morphogenesis	0.0160523	P02462	Collagen alpha-1(IV) chain	12.585	Up	0.0074763	COL4A1	7.3	160.61	38.958	27	8	5	1	1	0	11	8	6	2	1	2	7	7	6	0	0	0	4	5	4	1384800	707960	416020	14184000	16730000	8212900	0.213	0.101	0.173	2.054	2.137	1.938
Biological Process	GO:0048729	5	tissue morphogenesis	0.0160523	P08476	Inhibin beta A chain	24.045	Up	0.027082	INHBA	27.9	47.442	105.8	37	10	10	2	1	0	15	13	6	4	2	2	10	10	7	4	2	2	10	10	7	1176200	1032900	392470	51990000	22598000	5842500	0.091	0.074	0.081	3.776	1.448	0.691
Biological Process	GO:0048729	5	tissue morphogenesis	0.0160523	P50281	Matrix metalloproteinase-14	6.248	Up	0.033159	MMP14	4.3	65.893	17.655	4	2	2	1	0	1	1	1	0	1	0	1	1	2	0	1	0	1	1	2	0	560520	0	338470	3749200	6850500	0	0.208		0.34	1.311	2.113
Biological Process	GO:0048729	5	tissue morphogenesis	0.0160523	P62081	40S ribosomal protein S7	1.999	Up	0.039161	RPS7	11.3	22.127	7.5817	10	1	1	3	2	1	1	1	2	1	1	1	1	1	1	1	1	1	1	1	1	1194800	990110	493130	1619000	3003300	1871400	0.835	0.64	0.931	1.064	1.742	2.003
Biological Process	GO:0048729	5	tissue morphogenesis	0.0160523	O00622	Protein CYR61	7.006	Up	0.027799	CYR61	27.3	42.026	33.987	23	8	8	3	2	2	8	5	3	5	2	3	7	6	5	5	2	3	7	6	5	7543100	2060100	876710	48582000	13641000	16819000	0.54	0.136	0.17	3.272	0.81	1.845
Biological Process	GO:0048729	5	tissue morphogenesis	0.0160523	P02461	Collagen alpha-1(III) chain	18.249	Up	0.00135962	COL3A1	55.5	138.56	323.31	349	60	45	21	9	10	97	117	95	28	18	15	56	57	57	18	12	9	42	42	42	57554000	29731000	34116000	850330000	1397000000	817160000	0.115	0.055	0.184	1.609	2.332	2.519
Biological Process	GO:0048638	5	regulation of developmental growth	0.117447	O14786	Neuropilin-1	13.08	Up	0.0148198	NRP1	9.2	103.13	64.877	11	6	6	1	0	1	1	4	4	1	1	1	3	6	5	1	1	1	3	6	5	126450	248210	86880	757100	3121500	2859100	0.112	0.204	0.207	0.634	2.307	3.9
Biological Process	GO:0048638	5	regulation of developmental growth	0.117447	Q9Y215	Acetylcholinesterase collagenic tail peptide	7.717	Up	0.00164032	COLQ	4.6	47.766	1.6263	6	2	2	1	1	0	1	1	2	1	1	1	2	2	2	1	1	1	2	2	2	8428700	7833500	6439400	85794000	93236000	63641000	0.204	0.175	0.421	1.95	1.869	2.355
Biological Process	GO:0048638	5	regulation of developmental growth	0.117447	P23284	Peptidyl-prolyl cis-trans isomerase B	1.886	Up	0.049863	PPIB	47.7	23.742	119.2	59	10	10	7	7	7	14	11	13	9	8	9	10	10	10	9	8	9	10	10	10	106300000	193780000	67625000	236290000	348430000	242220000	0.57	0.961	0.98	1.193	1.551	1.992
Biological Process	GO:0048638	5	regulation of developmental growth	0.117447	P46821	Microtubule-associated protein 1B	4.466	Up	0.0055964	MAP1B	7.3	270.63	51.578	50	15	14	9	7	4	15	12	3	11	9	7	13	13	6	10	8	6	12	12	5	1003200	1773700	510480	7764700	4346500	4583900	0.321	0.526	0.441	2.343	1.157	2.252
Biological Process	GO:0000902	6	cell morphogenesis	0.0475286	O43505	"Beta-1,4-glucuronyltransferase 1"	2.816	Up	0.024224	B4GAT1	8.4	47.119	4.6568	4	3	3	0	0	0	0	3	1	1	1	1	2	3	2	1	1	1	2	3	2	964920	2011500	1042400	5248800	5971000	3899800	0.323	0.623	0.942	1.654	1.66	2.002
Biological Process	GO:0000902	6	cell morphogenesis	0.0475286	Q9BUD6	Spondin-2	184.242	Up	0.00041536	SPON2	36	35.846	228.89	60	10	10	0	1	0	18	26	15	3	3	2	10	10	9	3	3	2	10	10	9	2450400	2740400	2753300	531960000	1504000000	325430000	0.006	0.007	0.02	1.354	3.377	1.349
Biological Process	GO:0000902	6	cell morphogenesis	0.0475286	O14786	Neuropilin-1	13.08	Up	0.0148198	NRP1	9.2	103.13	64.877	11	6	6	1	0	1	1	4	4	1	1	1	3	6	5	1	1	1	3	6	5	126450	248210	86880	757100	3121500	2859100	0.112	0.204	0.207	0.634	2.307	3.9
Biological Process	GO:0000902	6	cell morphogenesis	0.0475286	P35579	Myosin-9	2.091	Up	0.042662	MYH9	33.2	226.53	323.31	219	57	45	38	21	11	44	74	31	41	36	21	48	55	43	33	30	19	38	45	35	14494000	8704600	4148000	18023000	38284000	14179000	0.949	0.527	0.732	1.111	2.082	1.424
Biological Process	GO:0000902	6	cell morphogenesis	0.0475286	P35052	Glypican-1	6.895	Up	0.0086422	GPC1	12.9	61.68	23.613	12	5	5	0	0	0	4	3	5	2	1	1	4	5	4	2	1	1	4	5	4	724470	242550	240590	2585200	5283300	2729100	0.393	0.121	0.352	1.321	2.38	2.27
Biological Process	GO:0000902	6	cell morphogenesis	0.0475286	O00339	Matrilin-2	5.582	Up	0.020144	MATN2	19	106.84	96.642	41	16	16	4	0	1	11	19	6	5	1	3	14	15	10	5	1	3	14	15	10	3198400	1689900	1925900	15212000	36530000	7126800	0.312	0.152	0.507	1.397	2.958	1.065
Biological Process	GO:0000902	6	cell morphogenesis	0.0475286	P46821	Microtubule-associated protein 1B	4.466	Up	0.0055964	MAP1B	7.3	270.63	51.578	50	15	14	9	7	4	15	12	3	11	9	7	13	13	6	10	8	6	12	12	5	1003200	1773700	510480	7764700	4346500	4583900	0.321	0.526	0.441	2.343	1.157	2.252
Biological Process	GO:0000902	6	cell morphogenesis	0.0475286	Q16394	Exostosin-1	3.011	Up	0.014302	EXT1	4	86.254	4.0604	4	3	3	0	0	0	1	2	1	2	2	2	1	3	2	2	2	2	1	3	2	467150	251380	119070	932490	1693100	516750	0.751	0.374	0.519	1.413	2.262	1.275
Biological Process	GO:0000902	6	cell morphogenesis	0.0475286	Q15063	Periostin	16.047	Up	0.031338	POSTN	48.9	93.313	323.31	109	31	13	0	15	1	22	42	29	5	23	5	28	31	28	1	10	1	11	13	11	1390500	63201000	1462900	154150000	583880000	255670000	0.009	0.353	0.023	0.877	2.931	2.37
Biological Process	GO:0002009	6	morphogenesis of an epithelium	0.040196	O14786	Neuropilin-1	13.08	Up	0.0148198	NRP1	9.2	103.13	64.877	11	6	6	1	0	1	1	4	4	1	1	1	3	6	5	1	1	1	3	6	5	126450	248210	86880	757100	3121500	2859100	0.112	0.204	0.207	0.634	2.307	3.9
Biological Process	GO:0002009	6	morphogenesis of an epithelium	0.040196	Q96CG8	Collagen triple helix repeat-containing protein 1	20.075	Up	0.00065888	CTHRC1	34.2	26.224	67.085	21	7	7	3	0	0	5	7	6	4	3	2	7	7	5	4	3	2	7	7	5	5132900	5470900	1166300	105070000	144000000	32728000	0.112	0.111	0.069	2.158	2.609	1.095
Biological Process	GO:0002009	6	morphogenesis of an epithelium	0.040196	P02462	Collagen alpha-1(IV) chain	12.585	Up	0.0074763	COL4A1	7.3	160.61	38.958	27	8	5	1	1	0	11	8	6	2	1	2	7	7	6	0	0	0	4	5	4	1384800	707960	416020	14184000	16730000	8212900	0.213	0.101	0.173	2.054	2.137	1.938
Biological Process	GO:0002009	6	morphogenesis of an epithelium	0.040196	P50281	Matrix metalloproteinase-14	6.248	Up	0.033159	MMP14	4.3	65.893	17.655	4	2	2	1	0	1	1	1	0	1	0	1	1	2	0	1	0	1	1	2	0	560520	0	338470	3749200	6850500	0	0.208		0.34	1.311	2.113
Biological Process	GO:0002009	6	morphogenesis of an epithelium	0.040196	P62081	40S ribosomal protein S7	1.999	Up	0.039161	RPS7	11.3	22.127	7.5817	10	1	1	3	2	1	1	1	2	1	1	1	1	1	1	1	1	1	1	1	1	1194800	990110	493130	1619000	3003300	1871400	0.835	0.64	0.931	1.064	1.742	2.003
Biological Process	GO:0002009	6	morphogenesis of an epithelium	0.040196	O00622	Protein CYR61	7.006	Up	0.027799	CYR61	27.3	42.026	33.987	23	8	8	3	2	2	8	5	3	5	2	3	7	6	5	5	2	3	7	6	5	7543100	2060100	876710	48582000	13641000	16819000	0.54	0.136	0.17	3.272	0.81	1.845
Biological Process	GO:0001938	8	positive regulation of endothelial cell proliferation	0.113538	O14786	Neuropilin-1	13.08	Up	0.0148198	NRP1	9.2	103.13	64.877	11	6	6	1	0	1	1	4	4	1	1	1	3	6	5	1	1	1	3	6	5	126450	248210	86880	757100	3121500	2859100	0.112	0.204	0.207	0.634	2.307	3.9
Biological Process	GO:0001938	8	positive regulation of endothelial cell proliferation	0.113538	Q969H8	Myeloid-derived growth factor	6.651	Up	0.043878	MYDGF	24.9	18.795	41.03	12	3	3	0	0	0	3	5	4	1	2	1	3	3	3	1	2	1	3	3	3	1685700	7326800	159080	13437000	31893000	13028000	0.16	0.643	0.04	1.2	2.512	1.895
Biological Process	GO:0016049	4	cell growth	0.0380157	O14786	Neuropilin-1	13.08	Up	0.0148198	NRP1	9.2	103.13	64.877	11	6	6	1	0	1	1	4	4	1	1	1	3	6	5	1	1	1	3	6	5	126450	248210	86880	757100	3121500	2859100	0.112	0.204	0.207	0.634	2.307	3.9
Biological Process	GO:0016049	4	cell growth	0.0380157	Q15063	Periostin	16.047	Up	0.031338	POSTN	48.9	93.313	323.31	109	31	13	0	15	1	22	42	29	5	23	5	28	31	28	1	10	1	11	13	11	1390500	63201000	1462900	154150000	583880000	255670000	0.009	0.353	0.023	0.877	2.931	2.37
Biological Process	GO:0016049	4	cell growth	0.0380157	P46821	Microtubule-associated protein 1B	4.466	Up	0.0055964	MAP1B	7.3	270.63	51.578	50	15	14	9	7	4	15	12	3	11	9	7	13	13	6	10	8	6	12	12	5	1003200	1773700	510480	7764700	4346500	4583900	0.321	0.526	0.441	2.343	1.157	2.252
Biological Process	GO:0051094	5	positive regulation of developmental process	0.000102342	O14786	Neuropilin-1	13.08	Up	0.0148198	NRP1	9.2	103.13	64.877	11	6	6	1	0	1	1	4	4	1	1	1	3	6	5	1	1	1	3	6	5	126450	248210	86880	757100	3121500	2859100	0.112	0.204	0.207	0.634	2.307	3.9
Biological Process	GO:0051094	5	positive regulation of developmental process	0.000102342	Q9Y4K0	Lysyl oxidase homolog 2	97.971	Up	0.00178461	LOXL2	39.8	86.724	323.31	106	26	26	2	0	0	33	40	31	3	3	1	25	26	24	3	3	1	25	26	24	666620	5011100	1170400	194120000	312420000	232340000	0.005	0.039	0.026	1.57	2.229	3.059
Biological Process	GO:0051094	5	positive regulation of developmental process	0.000102342	P35052	Glypican-1	6.895	Up	0.0086422	GPC1	12.9	61.68	23.613	12	5	5	0	0	0	4	3	5	2	1	1	4	5	4	2	1	1	4	5	4	724470	242550	240590	2585200	5283300	2729100	0.393	0.121	0.352	1.321	2.38	2.27
Biological Process	GO:0051094	5	positive regulation of developmental process	0.000102342	P36955	Pigment epithelium-derived factor	5.022	Up	0.042517	SERPINF1	31.1	46.312	90.643	59	13	9	6	4	5	13	17	14	5	6	5	11	12	12	1	2	1	7	8	8	24428000	22346000	22355000	75787000	187740000	197270000	0.296	0.25	0.729	0.862	1.885	3.656
Biological Process	GO:0051094	5	positive regulation of developmental process	0.000102342	Q969H8	Myeloid-derived growth factor	6.651	Up	0.043878	MYDGF	24.9	18.795	41.03	12	3	3	0	0	0	3	5	4	1	2	1	3	3	3	1	2	1	3	3	3	1685700	7326800	159080	13437000	31893000	13028000	0.16	0.643	0.04	1.2	2.512	1.895
Biological Process	GO:0051094	5	positive regulation of developmental process	0.000102342	P50281	Matrix metalloproteinase-14	6.248	Up	0.033159	MMP14	4.3	65.893	17.655	4	2	2	1	0	1	1	1	0	1	0	1	1	2	0	1	0	1	1	2	0	560520	0	338470	3749200	6850500	0	0.208		0.34	1.311	2.113
Biological Process	GO:0051094	5	positive regulation of developmental process	0.000102342	P46821	Microtubule-associated protein 1B	4.466	Up	0.0055964	MAP1B	7.3	270.63	51.578	50	15	14	9	7	4	15	12	3	11	9	7	13	13	6	10	8	6	12	12	5	1003200	1773700	510480	7764700	4346500	4583900	0.321	0.526	0.441	2.343	1.157	2.252
Biological Process	GO:0051094	5	positive regulation of developmental process	0.000102342	P07093	Glia-derived nexin	11.771	Up	0.0067036	SERPINE2	46.2	44.002	169.23	127	17	17	12	5	6	33	47	24	12	9	9	16	16	14	12	9	9	16	16	14	132430000	37889000	41650000	871260000	2057200000	504660000	0.233	0.061	0.199	1.441	3.002	1.36
Biological Process	GO:0051094	5	positive regulation of developmental process	0.000102342	O00622	Protein CYR61	7.006	Up	0.027799	CYR61	27.3	42.026	33.987	23	8	8	3	2	2	8	5	3	5	2	3	7	6	5	5	2	3	7	6	5	7543100	2060100	876710	48582000	13641000	16819000	0.54	0.136	0.17	3.272	0.81	1.845
Biological Process	GO:0051094	5	positive regulation of developmental process	0.000102342	O60687	Sushi repeat-containing protein SRPX2	19.744	Up	0.039323	SRPX2	33.8	52.971	82.027	42	12	12	1	0	0	13	17	11	4	2	1	12	12	12	4	2	1	12	12	12	5990700	596270	391460	51851000	62309000	32087000	0.251	0.023	0.043	2.04	2.163	2.056
Biological Process	GO:0051094	5	positive regulation of developmental process	0.000102342	Q96CG8	Collagen triple helix repeat-containing protein 1	20.075	Up	0.00065888	CTHRC1	34.2	26.224	67.085	21	7	7	3	0	0	5	7	6	4	3	2	7	7	5	4	3	2	7	7	5	5132900	5470900	1166300	105070000	144000000	32728000	0.112	0.111	0.069	2.158	2.609	1.095
Biological Process	GO:0051094	5	positive regulation of developmental process	0.000102342	Q9GZP0	Platelet-derived growth factor D	16.251	Up	0.0095559	PDGFD	13.2	42.848	9.1286	11	4	4	1	0	1	2	2	5	1	1	1	3	3	4	1	1	1	3	3	4	175330	1553700	111740	11601000	7599100	8976200	0.037	0.307	0.063	2.331	1.347	2.936
Biological Process	GO:0051094	5	positive regulation of developmental process	0.000102342	P08476	Inhibin beta A chain	24.045	Up	0.027082	INHBA	27.9	47.442	105.8	37	10	10	2	1	0	15	13	6	4	2	2	10	10	7	4	2	2	10	10	7	1176200	1032900	392470	51990000	22598000	5842500	0.091	0.074	0.081	3.776	1.448	0.691
Biological Process	GO:0051094	5	positive regulation of developmental process	0.000102342	P01024	Complement C3	63.787	Up	0.044438	C3	35.5	187.15	289.83	92	48	39	0	0	0	26	18	48	12	9	10	36	32	47	3	0	1	27	23	38	224670	0	216400	11599000	4975900	41408000	0.02		0.055	0.998	0.378	5.8
Biological Process	GO:0051094	5	positive regulation of developmental process	0.000102342	P19022	Cadherin-2	10.125	Up	0.020937	CDH2	12.1	99.808	74.261	38	9	9	1	5	0	15	10	7	2	4	0	8	9	5	2	4	0	8	9	5	710180	2890000	0	22514000	22758000	7325000	0.067	0.254		2.013	1.795	1.067
Biological Process	GO:0051094	5	positive regulation of developmental process	0.000102342	P23284	Peptidyl-prolyl cis-trans isomerase B	1.886	Up	0.049863	PPIB	47.7	23.742	119.2	59	10	10	7	7	7	14	11	13	9	8	9	10	10	10	9	8	9	10	10	10	106300000	193780000	67625000	236290000	348430000	242220000	0.57	0.961	0.98	1.193	1.551	1.992
Biological Process	GO:0051094	5	positive regulation of developmental process	0.000102342	P05121	Plasminogen activator inhibitor 1	2.572	Up	0.0112754	SERPINE1	49.3	45.059	323.31	290	20	20	41	44	24	75	56	50	18	19	18	20	20	19	18	19	18	20	20	19	696760000	1081900000	342880000	3286900000	2170100000	1205400000	0.508	0.73	0.674	2.256	1.314	1.347
Biological Process	GO:0051094	5	positive regulation of developmental process	0.000102342	P07585	Decorin	45.345	Up	0.0174386	DCN	30.1	39.746	232.11	46	10	9	1	2	5	6	20	12	2	5	9	9	10	10	2	4	8	8	9	9	3435200	21371000	21981000	284750000	2299500000	1033400000	0.006	0.035	0.104	0.468	3.338	2.769
Biological Process	GO:0060284	6	regulation of cell development	0.0694976	O14786	Neuropilin-1	13.08	Up	0.0148198	NRP1	9.2	103.13	64.877	11	6	6	1	0	1	1	4	4	1	1	1	3	6	5	1	1	1	3	6	5	126450	248210	86880	757100	3121500	2859100	0.112	0.204	0.207	0.634	2.307	3.9
Biological Process	GO:0060284	6	regulation of cell development	0.0694976	P09382	Galectin-1	3.787	Up	0.00191859	LGALS1	64.4	14.716	282.85	94	8	8	15	18	8	17	19	17	7	8	6	8	8	8	7	8	6	8	8	8	273840000	282090000	69357000	724230000	1303200000	632750000	0.534	0.508	0.366	1.33	2.11	1.892
Biological Process	GO:0060284	6	regulation of cell development	0.0694976	P36955	Pigment epithelium-derived factor	5.022	Up	0.042517	SERPINF1	31.1	46.312	90.643	59	13	9	6	4	5	13	17	14	5	6	5	11	12	12	1	2	1	7	8	8	24428000	22346000	22355000	75787000	187740000	197270000	0.296	0.25	0.729	0.862	1.885	3.656
Biological Process	GO:0060284	6	regulation of cell development	0.0694976	Q08629	Testican-1	66.774	Up	0.0048835	SPOCK1	40.1	49.124	139.54	49	15	15	0	1	1	13	24	10	2	5	2	13	15	13	2	5	2	13	15	13	781440	3773900	122840	48510000	200270000	59872000	0.016	0.071	0.006	0.934	3.4	1.876
Biological Process	GO:0060284	6	regulation of cell development	0.0694976	P19022	Cadherin-2	10.125	Up	0.020937	CDH2	12.1	99.808	74.261	38	9	9	1	5	0	15	10	7	2	4	0	8	9	5	2	4	0	8	9	5	710180	2890000	0	22514000	22758000	7325000	0.067	0.254		2.013	1.795	1.067
Biological Process	GO:0060284	6	regulation of cell development	0.0694976	P46821	Microtubule-associated protein 1B	4.466	Up	0.0055964	MAP1B	7.3	270.63	51.578	50	15	14	9	7	4	15	12	3	11	9	7	13	13	6	10	8	6	12	12	5	1003200	1773700	510480	7764700	4346500	4583900	0.321	0.526	0.441	2.343	1.157	2.252
Biological Process	GO:0060284	6	regulation of cell development	0.0694976	P02461	Collagen alpha-1(III) chain	18.249	Up	0.00135962	COL3A1	55.5	138.56	323.31	349	60	45	21	9	10	97	117	95	28	18	15	56	57	57	18	12	9	42	42	42	57554000	29731000	34116000	850330000	1397000000	817160000	0.115	0.055	0.184	1.609	2.332	2.519
Biological Process	GO:0060284	6	regulation of cell development	0.0694976	Q15063	Periostin	16.047	Up	0.031338	POSTN	48.9	93.313	323.31	109	31	13	0	15	1	22	42	29	5	23	5	28	31	28	1	10	1	11	13	11	1390500	63201000	1462900	154150000	583880000	255670000	0.009	0.353	0.023	0.877	2.931	2.37
Biological Process	GO:0060284	6	regulation of cell development	0.0694976	P07093	Glia-derived nexin	11.771	Up	0.0067036	SERPINE2	46.2	44.002	169.23	127	17	17	12	5	6	33	47	24	12	9	9	16	16	14	12	9	9	16	16	14	132430000	37889000	41650000	871260000	2057200000	504660000	0.233	0.061	0.199	1.441	3.002	1.36

## Sheet: UP-About inflammation
GO Terms Level 1	GO Terms ID	GO Terms Level	GO Terms Description	Fisher's exact test P value	Protein accession	Protein description	Ratio	Regulated Type	P value	Gene name	Sequence coverage [%]	Mol. weight [kDa]	Score	MS/MS Counts	Peptides	Unique peptides	MS/MS Count E1	MS/MS Count E2	MS/MS Count E3	MS/MS Count M1	MS/MS Count M2	MS/MS Count M3	Peptides E1	Peptides E2	Peptides E3	Peptides M1	Peptides M2	Peptides M3	Unique peptides E1	Unique peptides E2	Unique peptides E3	Unique peptides M1	Unique peptides M2	Unique peptides M3	iBAQ E1	iBAQ E2	iBAQ E3	iBAQ M1	iBAQ M2	iBAQ M3	E1	E2	E3	M1	M2	M3
Biological Process	GO:0001817	5	regulation of cytokine production	0.0915757	Q9BWS9	Chitinase domain-containing protein 1	5.628	Up	0.030941	CHID1	10.9	44.94	6.8577	13	4	4	1	1	0	4	5	2	2	2	1	3	4	2	2	2	1	3	4	2	444990	1094500	78763	1613400	5598800	2096500	0.26	0.593	0.124	0.89	2.725	1.884
Biological Process	GO:0001817	5	regulation of cytokine production	0.0915757	Q9BUD6	Spondin-2	184.242	Up	0.00041536	SPON2	36	35.846	228.89	60	10	10	0	1	0	18	26	15	3	3	2	10	10	9	3	3	2	10	10	9	2450400	2740400	2753300	531960000	1504000000	325430000	0.006	0.007	0.02	1.354	3.377	1.349
Biological Process	GO:0001817	5	regulation of cytokine production	0.0915757	Q15063	Periostin	16.047	Up	0.031338	POSTN	48.9	93.313	323.31	109	31	13	0	15	1	22	42	29	5	23	5	28	31	28	1	10	1	11	13	11	1390500	63201000	1462900	154150000	583880000	255670000	0.009	0.353	0.023	0.877	2.931	2.37
Biological Process	GO:0001817	5	regulation of cytokine production	0.0915757	P05121	Plasminogen activator inhibitor 1	2.572	Up	0.0112754	SERPINE1	49.3	45.059	323.31	290	20	20	41	44	24	75	56	50	18	19	18	20	20	19	18	19	18	20	20	19	696760000	1081900000	342880000	3286900000	2170100000	1205400000	0.508	0.73	0.674	2.256	1.314	1.347
Biological Process	GO:0001817	5	regulation of cytokine production	0.0915757	P08476	Inhibin beta A chain	24.045	Up	0.027082	INHBA	27.9	47.442	105.8	37	10	10	2	1	0	15	13	6	4	2	2	10	10	7	4	2	2	10	10	7	1176200	1032900	392470	51990000	22598000	5842500	0.091	0.074	0.081	3.776	1.448	0.691
Biological Process	GO:0001817	5	regulation of cytokine production	0.0915757	P01024	Complement C3	63.787	Up	0.044438	C3	35.5	187.15	289.83	92	48	39	0	0	0	26	18	48	12	9	10	36	32	47	3	0	1	27	23	38	224670	0	216400	11599000	4975900	41408000	0.02		0.055	0.998	0.378	5.8
Biological Process	GO:0071675	9	regulation of mononuclear cell migration	0.0714231	P05121	Plasminogen activator inhibitor 1	2.572	Up	0.0112754	SERPINE1	49.3	45.059	323.31	290	20	20	41	44	24	75	56	50	18	19	18	20	20	19	18	19	18	20	20	19	696760000	1081900000	342880000	3286900000	2170100000	1205400000	0.508	0.73	0.674	2.256	1.314	1.347
Biological Process	GO:0071675	9	regulation of mononuclear cell migration	0.0714231	Q9GZP0	Platelet-derived growth factor D	16.251	Up	0.0095559	PDGFD	13.2	42.848	9.1286	11	4	4	1	0	1	2	2	5	1	1	1	3	3	4	1	1	1	3	3	4	175330	1553700	111740	11601000	7599100	8976200	0.037	0.307	0.063	2.331	1.347	2.936
Biological Process	GO:0002687	9	positive regulation of leukocyte migration	0.0268856	P19876	C-X-C motif chemokine 3	33.42	Up	0.0195594	CXCL3	45.8	11.342	59.848	12	4	3	0	1	0	2	3	6	1	2	1	4	4	4	1	2	1	3	3	3	1342600	519640	735400	17964000	11262000	66575000	0.088	0.032	0.13	1.101	0.609	6.645
Biological Process	GO:0002687	9	positive regulation of leukocyte migration	0.0268856	P05121	Plasminogen activator inhibitor 1	2.572	Up	0.0112754	SERPINE1	49.3	45.059	323.31	290	20	20	41	44	24	75	56	50	18	19	18	20	20	19	18	19	18	20	20	19	696760000	1081900000	342880000	3286900000	2170100000	1205400000	0.508	0.73	0.674	2.256	1.314	1.347
Biological Process	GO:0002687	9	positive regulation of leukocyte migration	0.0268856	Q9GZP0	Platelet-derived growth factor D	16.251	Up	0.0095559	PDGFD	13.2	42.848	9.1286	11	4	4	1	0	1	2	2	5	1	1	1	3	3	4	1	1	1	3	3	4	175330	1553700	111740	11601000	7599100	8976200	0.037	0.307	0.063	2.331	1.347	2.936
Biological Process	GO:0002687	9	positive regulation of leukocyte migration	0.0268856	P50281	Matrix metalloproteinase-14	6.248	Up	0.033159	MMP14	4.3	65.893	17.655	4	2	2	1	0	1	1	1	0	1	0	1	1	2	0	1	0	1	1	2	0	560520	0	338470	3749200	6850500	0	0.208		0.34	1.311	2.113
Biological Process	GO:0050921	7	positive regulation of chemotaxis	0.0385701	P19876	C-X-C motif chemokine 3	33.42	Up	0.0195594	CXCL3	45.8	11.342	59.848	12	4	3	0	1	0	2	3	6	1	2	1	4	4	4	1	2	1	3	3	3	1342600	519640	735400	17964000	11262000	66575000	0.088	0.032	0.13	1.101	0.609	6.645
Biological Process	GO:0050921	7	positive regulation of chemotaxis	0.0385701	O14786	Neuropilin-1	13.08	Up	0.0148198	NRP1	9.2	103.13	64.877	11	6	6	1	0	1	1	4	4	1	1	1	3	6	5	1	1	1	3	6	5	126450	248210	86880	757100	3121500	2859100	0.112	0.204	0.207	0.634	2.307	3.9
Biological Process	GO:0050921	7	positive regulation of chemotaxis	0.0385701	P05121	Plasminogen activator inhibitor 1	2.572	Up	0.0112754	SERPINE1	49.3	45.059	323.31	290	20	20	41	44	24	75	56	50	18	19	18	20	20	19	18	19	18	20	20	19	696760000	1081900000	342880000	3286900000	2170100000	1205400000	0.508	0.73	0.674	2.256	1.314	1.347
Biological Process	GO:0050921	7	positive regulation of chemotaxis	0.0385701	Q9GZP0	Platelet-derived growth factor D	16.251	Up	0.0095559	PDGFD	13.2	42.848	9.1286	11	4	4	1	0	1	2	2	5	1	1	1	3	3	4	1	1	1	3	3	4	175330	1553700	111740	11601000	7599100	8976200	0.037	0.307	0.063	2.331	1.347	2.936
Biological Process	GO:0045577	9	regulation of B cell differentiation	0.00584864	P08476	Inhibin beta A chain	24.045	Up	0.027082	INHBA	27.9	47.442	105.8	37	10	10	2	1	0	15	13	6	4	2	2	10	10	7	4	2	2	10	10	7	1176200	1032900	392470	51990000	22598000	5842500	0.091	0.074	0.081	3.776	1.448	0.691
Biological Process	GO:0045577	9	regulation of B cell differentiation	0.00584864	P50281	Matrix metalloproteinase-14	6.248	Up	0.033159	MMP14	4.3	65.893	17.655	4	2	2	1	0	1	1	1	0	1	0	1	1	2	0	1	0	1	1	2	0	560520	0	338470	3749200	6850500	0	0.208		0.34	1.311	2.113
Biological Process	GO:0050727	7	regulation of inflammatory response	0.0885074	Q9BWS9	Chitinase domain-containing protein 1	5.628	Up	0.030941	CHID1	10.9	44.94	6.8577	13	4	4	1	1	0	4	5	2	2	2	1	3	4	2	2	2	1	3	4	2	444990	1094500	78763	1613400	5598800	2096500	0.26	0.593	0.124	0.89	2.725	1.884
Biological Process	GO:0050727	7	regulation of inflammatory response	0.0885074	P05121	Plasminogen activator inhibitor 1	2.572	Up	0.0112754	SERPINE1	49.3	45.059	323.31	290	20	20	41	44	24	75	56	50	18	19	18	20	20	19	18	19	18	20	20	19	696760000	1081900000	342880000	3286900000	2170100000	1205400000	0.508	0.73	0.674	2.256	1.314	1.347
Biological Process	GO:0050727	7	regulation of inflammatory response	0.0885074	P36955	Pigment epithelium-derived factor	5.022	Up	0.042517	SERPINF1	31.1	46.312	90.643	59	13	9	6	4	5	13	17	14	5	6	5	11	12	12	1	2	1	7	8	8	24428000	22346000	22355000	75787000	187740000	197270000	0.296	0.25	0.729	0.862	1.885	3.656
Biological Process	GO:0050727	7	regulation of inflammatory response	0.0885074	P01024	Complement C3	63.787	Up	0.044438	C3	35.5	187.15	289.83	92	48	39	0	0	0	26	18	48	12	9	10	36	32	47	3	0	1	27	23	38	224670	0	216400	11599000	4975900	41408000	0.02		0.055	0.998	0.378	5.8
Biological Process	GO:0002688	9	regulation of leukocyte chemotaxis	0.260944	P19876	C-X-C motif chemokine 3	33.42	Up	0.0195594	CXCL3	45.8	11.342	59.848	12	4	3	0	1	0	2	3	6	1	2	1	4	4	4	1	2	1	3	3	3	1342600	519640	735400	17964000	11262000	66575000	0.088	0.032	0.13	1.101	0.609	6.645
Biological Process	GO:0002688	9	regulation of leukocyte chemotaxis	0.260944	P05121	Plasminogen activator inhibitor 1	2.572	Up	0.0112754	SERPINE1	49.3	45.059	323.31	290	20	20	41	44	24	75	56	50	18	19	18	20	20	19	18	19	18	20	20	19	696760000	1081900000	342880000	3286900000	2170100000	1205400000	0.508	0.73	0.674	2.256	1.314	1.347
Biological Process	GO:0006954	5	inflammatory response	0.0868502	P19876	C-X-C motif chemokine 3	33.42	Up	0.0195594	CXCL3	45.8	11.342	59.848	12	4	3	0	1	0	2	3	6	1	2	1	4	4	4	1	2	1	3	3	3	1342600	519640	735400	17964000	11262000	66575000	0.088	0.032	0.13	1.101	0.609	6.645
Biological Process	GO:0006954	5	inflammatory response	0.0868502	P26022	Pentraxin-related protein PTX3	30.646	Up	0.040637	PTX3	57.2	41.975	302.54	122	19	19	0	11	0	44	25	42	1	11	0	18	15	18	1	11	0	18	15	18	5527300	88657000	0	1775300000	540030000	1244100000	0.009	0.119		2.442	0.655	2.787
Biological Process	GO:0006954	5	inflammatory response	0.0868502	P01011	Alpha-1-antichymotrypsin	35.455	Up	0.0063608	SERPINA3	24.3	47.65	56.947	29	8	8	0	0	0	10	11	8	1	2	0	7	8	6	1	2	0	7	8	6	898100	2182300	0	67754000	81907000	16008000	0.029	0.064		2.018	2.152	0.776
Biological Process	GO:0006954	5	inflammatory response	0.0868502	P01024	Complement C3	63.787	Up	0.044438	C3	35.5	187.15	289.83	92	48	39	0	0	0	26	18	48	12	9	10	36	32	47	3	0	1	27	23	38	224670	0	216400	11599000	4975900	41408000	0.02		0.055	0.998	0.378	5.8
Biological Process	GO:0006954	5	inflammatory response	0.0868502	P22692	Insulin-like growth factor-binding protein 4	17.813	Up	0.0086171	IGFBP4	38.8	27.934	98.133	67	9	9	4	6	3	15	20	19	6	5	5	8	8	9	6	5	5	8	8	9	36356000	28060000	17389000	217170000	582750000	818450000	0.137	0.098	0.176	0.77	1.824	4.727
Biological Process	GO:1902105	7	regulation of leukocyte differentiation	0.260944	P08476	Inhibin beta A chain	24.045	Up	0.027082	INHBA	27.9	47.442	105.8	37	10	10	2	1	0	15	13	6	4	2	2	10	10	7	4	2	2	10	10	7	1176200	1032900	392470	51990000	22598000	5842500	0.091	0.074	0.081	3.776	1.448	0.691
Biological Process	GO:1902105	7	regulation of leukocyte differentiation	0.260944	P50281	Matrix metalloproteinase-14	6.248	Up	0.033159	MMP14	4.3	65.893	17.655	4	2	2	1	0	1	1	1	0	1	0	1	1	2	0	1	0	1	1	2	0	560520	0	338470	3749200	6850500	0	0.208		0.34	1.311	2.113
Biological Process	GO:0002699	6	positive regulation of immune effector process	0.260944	Q9BUD6	Spondin-2	184.242	Up	0.00041536	SPON2	36	35.846	228.89	60	10	10	0	1	0	18	26	15	3	3	2	10	10	9	3	3	2	10	10	9	2450400	2740400	2753300	531960000	1504000000	325430000	0.006	0.007	0.02	1.354	3.377	1.349
Biological Process	GO:0002699	6	positive regulation of immune effector process	0.260944	P01024	Complement C3	63.787	Up	0.044438	C3	35.5	187.15	289.83	92	48	39	0	0	0	26	18	48	12	9	10	36	32	47	3	0	1	27	23	38	224670	0	216400	11599000	4975900	41408000	0.02		0.055	0.998	0.378	5.8
Biological Process	GO:0045619	8	regulation of lymphocyte differentiation	0.0988713	P08476	Inhibin beta A chain	24.045	Up	0.027082	INHBA	27.9	47.442	105.8	37	10	10	2	1	0	15	13	6	4	2	2	10	10	7	4	2	2	10	10	7	1176200	1032900	392470	51990000	22598000	5842500	0.091	0.074	0.081	3.776	1.448	0.691
Biological Process	GO:0045619	8	regulation of lymphocyte differentiation	0.0988713	P50281	Matrix metalloproteinase-14	6.248	Up	0.033159	MMP14	4.3	65.893	17.655	4	2	2	1	0	1	1	1	0	1	0	1	1	2	0	1	0	1	1	2	0	560520	0	338470	3749200	6850500	0	0.208		0.34	1.311	2.113
Biological Process	GO:0002573	10	myeloid leukocyte differentiation	0.0988713	P35579	Myosin-9	2.091	Up	0.042662	MYH9	33.2	226.53	323.31	219	57	45	38	21	11	44	74	31	41	36	21	48	55	43	33	30	19	38	45	35	14494000	8704600	4148000	18023000	38284000	14179000	0.949	0.527	0.732	1.111	2.082	1.424
Biological Process	GO:0002573	10	myeloid leukocyte differentiation	0.0988713	Q04760	Lactoylglutathione lyase	6.734	Up	0.00094414	GLO1	10.3	20.777	2.4412	4	2	2	0	1	1	1	0	1	1	1	1	2	2	2	1	1	1	2	2	2	1221200	701100	387730	5921500	7231400	5222500	0.378	0.2	0.323	1.727	1.86	2.48
Biological Process	GO:0050900	7	leukocyte migration	0.0528913	P19876	C-X-C motif chemokine 3	33.42	Up	0.0195594	CXCL3	45.8	11.342	59.848	12	4	3	0	1	0	2	3	6	1	2	1	4	4	4	1	2	1	3	3	3	1342600	519640	735400	17964000	11262000	66575000	0.088	0.032	0.13	1.101	0.609	6.645
Biological Process	GO:0050900	7	leukocyte migration	0.0528913	P08123	Collagen alpha-2(I) chain	7.798	Up	0.025324	COL1A2	68.7	129.31	323.31	518	61	60	60	54	19	146	96	143	52	48	28	60	59	59	51	47	27	59	58	58	278620000	258050000	34024000	1623600000	685150000	1723900000	0.387	0.332	0.127	2.127	0.792	3.678
Biological Process	GO:0050900	7	leukocyte migration	0.0528913	P35579	Myosin-9	2.091	Up	0.042662	MYH9	33.2	226.53	323.31	219	57	45	38	21	11	44	74	31	41	36	21	48	55	43	33	30	19	38	45	35	14494000	8704600	4148000	18023000	38284000	14179000	0.949	0.527	0.732	1.111	2.082	1.424
Biological Process	GO:0050900	7	leukocyte migration	0.0528913	P35052	Glypican-1	6.895	Up	0.0086422	GPC1	12.9	61.68	23.613	12	5	5	0	0	0	4	3	5	2	1	1	4	5	4	2	1	1	4	5	4	724470	242550	240590	2585200	5283300	2729100	0.393	0.121	0.352	1.321	2.38	2.27
Biological Process	GO:0050900	7	leukocyte migration	0.0528913	Q9UNN8	Endothelial protein C receptor	4.576	Up	0.026459	PROCR	3.8	26.671	1.5589	2	1	1	0	0	0	1	1	0	1	1	1	1	1	1	1	1	1	1	1	1	669160	1232300	170330	3702900	4083400	2281000	0.353	0.601	0.242	1.839	1.789	1.845
Biological Process	GO:0002685	8	regulation of leukocyte migration	0.0527562	P19876	C-X-C motif chemokine 3	33.42	Up	0.0195594	CXCL3	45.8	11.342	59.848	12	4	3	0	1	0	2	3	6	1	2	1	4	4	4	1	2	1	3	3	3	1342600	519640	735400	17964000	11262000	66575000	0.088	0.032	0.13	1.101	0.609	6.645
Biological Process	GO:0002685	8	regulation of leukocyte migration	0.0527562	P05121	Plasminogen activator inhibitor 1	2.572	Up	0.0112754	SERPINE1	49.3	45.059	323.31	290	20	20	41	44	24	75	56	50	18	19	18	20	20	19	18	19	18	20	20	19	696760000	1081900000	342880000	3286900000	2170100000	1205400000	0.508	0.73	0.674	2.256	1.314	1.347
Biological Process	GO:0002685	8	regulation of leukocyte migration	0.0527562	Q9GZP0	Platelet-derived growth factor D	16.251	Up	0.0095559	PDGFD	13.2	42.848	9.1286	11	4	4	1	0	1	2	2	5	1	1	1	3	3	4	1	1	1	3	3	4	175330	1553700	111740	11601000	7599100	8976200	0.037	0.307	0.063	2.331	1.347	2.936
Biological Process	GO:0002685	8	regulation of leukocyte migration	0.0527562	P50281	Matrix metalloproteinase-14	6.248	Up	0.033159	MMP14	4.3	65.893	17.655	4	2	2	1	0	1	1	1	0	1	0	1	1	2	0	1	0	1	1	2	0	560520	0	338470	3749200	6850500	0	0.208		0.34	1.311	2.113
Biological Process	GO:0050728	8	negative regulation of inflammatory response	0.0848038	Q9BWS9	Chitinase domain-containing protein 1	5.628	Up	0.030941	CHID1	10.9	44.94	6.8577	13	4	4	1	1	0	4	5	2	2	2	1	3	4	2	2	2	1	3	4	2	444990	1094500	78763	1613400	5598800	2096500	0.26	0.593	0.124	0.89	2.725	1.884
Biological Process	GO:0050728	8	negative regulation of inflammatory response	0.0848038	P36955	Pigment epithelium-derived factor	5.022	Up	0.042517	SERPINF1	31.1	46.312	90.643	59	13	9	6	4	5	13	17	14	5	6	5	11	12	12	1	2	1	7	8	8	24428000	22346000	22355000	75787000	187740000	197270000	0.296	0.25	0.729	0.862	1.885	3.656
Biological Process	GO:0051249	7	regulation of lymphocyte activation	0.305858	P09382	Galectin-1	3.787	Up	0.00191859	LGALS1	64.4	14.716	282.85	94	8	8	15	18	8	17	19	17	7	8	6	8	8	8	7	8	6	8	8	8	273840000	282090000	69357000	724230000	1303200000	632750000	0.534	0.508	0.366	1.33	2.11	1.892
Biological Process	GO:0051249	7	regulation of lymphocyte activation	0.305858	P08476	Inhibin beta A chain	24.045	Up	0.027082	INHBA	27.9	47.442	105.8	37	10	10	2	1	0	15	13	6	4	2	2	10	10	7	4	2	2	10	10	7	1176200	1032900	392470	51990000	22598000	5842500	0.091	0.074	0.081	3.776	1.448	0.691
Biological Process	GO:0051249	7	regulation of lymphocyte activation	0.305858	P50281	Matrix metalloproteinase-14	6.248	Up	0.033159	MMP14	4.3	65.893	17.655	4	2	2	1	0	1	1	1	0	1	0	1	1	2	0	1	0	1	1	2	0	560520	0	338470	3749200	6850500	0	0.208		0.34	1.311	2.113
Biological Process	GO:0050864	8	regulation of B cell activation	0.0471055	P08476	Inhibin beta A chain	24.045	Up	0.027082	INHBA	27.9	47.442	105.8	37	10	10	2	1	0	15	13	6	4	2	2	10	10	7	4	2	2	10	10	7	1176200	1032900	392470	51990000	22598000	5842500	0.091	0.074	0.081	3.776	1.448	0.691
Biological Process	GO:0050864	8	regulation of B cell activation	0.0471055	P50281	Matrix metalloproteinase-14	6.248	Up	0.033159	MMP14	4.3	65.893	17.655	4	2	2	1	0	1	1	1	0	1	0	1	1	2	0	1	0	1	1	2	0	560520	0	338470	3749200	6850500	0	0.208		0.34	1.311	2.113
Biological Process	GO:0050729	8	positive regulation of inflammatory response	0.0588233	P05121	Plasminogen activator inhibitor 1	2.572	Up	0.0112754	SERPINE1	49.3	45.059	323.31	290	20	20	41	44	24	75	56	50	18	19	18	20	20	19	18	19	18	20	20	19	696760000	1081900000	342880000	3286900000	2170100000	1205400000	0.508	0.73	0.674	2.256	1.314	1.347
Biological Process	GO:0050729	8	positive regulation of inflammatory response	0.0588233	P01024	Complement C3	63.787	Up	0.044438	C3	35.5	187.15	289.83	92	48	39	0	0	0	26	18	48	12	9	10	36	32	47	3	0	1	27	23	38	224670	0	216400	11599000	4975900	41408000	0.02		0.055	0.998	0.378	5.8
Biological Process	GO:0001819	6	positive regulation of cytokine production	0.133297	Q9BUD6	Spondin-2	184.242	Up	0.00041536	SPON2	36	35.846	228.89	60	10	10	0	1	0	18	26	15	3	3	2	10	10	9	3	3	2	10	10	9	2450400	2740400	2753300	531960000	1504000000	325430000	0.006	0.007	0.02	1.354	3.377	1.349
Biological Process	GO:0001819	6	positive regulation of cytokine production	0.133297	Q15063	Periostin	16.047	Up	0.031338	POSTN	48.9	93.313	323.31	109	31	13	0	15	1	22	42	29	5	23	5	28	31	28	1	10	1	11	13	11	1390500	63201000	1462900	154150000	583880000	255670000	0.009	0.353	0.023	0.877	2.931	2.37
Biological Process	GO:0001819	6	positive regulation of cytokine production	0.133297	P05121	Plasminogen activator inhibitor 1	2.572	Up	0.0112754	SERPINE1	49.3	45.059	323.31	290	20	20	41	44	24	75	56	50	18	19	18	20	20	19	18	19	18	20	20	19	696760000	1081900000	342880000	3286900000	2170100000	1205400000	0.508	0.73	0.674	2.256	1.314	1.347
Biological Process	GO:0001819	6	positive regulation of cytokine production	0.133297	P01024	Complement C3	63.787	Up	0.044438	C3	35.5	187.15	289.83	92	48	39	0	0	0	26	18	48	12	9	10	36	32	47	3	0	1	27	23	38	224670	0	216400	11599000	4975900	41408000	0.02		0.055	0.998	0.378	5.8
Biological Process	GO:0002690	10	positive regulation of leukocyte chemotaxis	0.226888	P19876	C-X-C motif chemokine 3	33.42	Up	0.0195594	CXCL3	45.8	11.342	59.848	12	4	3	0	1	0	2	3	6	1	2	1	4	4	4	1	2	1	3	3	3	1342600	519640	735400	17964000	11262000	66575000	0.088	0.032	0.13	1.101	0.609	6.645
Biological Process	GO:0002690	10	positive regulation of leukocyte chemotaxis	0.226888	P05121	Plasminogen activator inhibitor 1	2.572	Up	0.0112754	SERPINE1	49.3	45.059	323.31	290	20	20	41	44	24	75	56	50	18	19	18	20	20	19	18	19	18	20	20	19	696760000	1081900000	342880000	3286900000	2170100000	1205400000	0.508	0.73	0.674	2.256	1.314	1.347
Biological Process	GO:0050920	6	regulation of chemotaxis	0.0635988	P19876	C-X-C motif chemokine 3	33.42	Up	0.0195594	CXCL3	45.8	11.342	59.848	12	4	3	0	1	0	2	3	6	1	2	1	4	4	4	1	2	1	3	3	3	1342600	519640	735400	17964000	11262000	66575000	0.088	0.032	0.13	1.101	0.609	6.645
Biological Process	GO:0050920	6	regulation of chemotaxis	0.0635988	O14786	Neuropilin-1	13.08	Up	0.0148198	NRP1	9.2	103.13	64.877	11	6	6	1	0	1	1	4	4	1	1	1	3	6	5	1	1	1	3	6	5	126450	248210	86880	757100	3121500	2859100	0.112	0.204	0.207	0.634	2.307	3.9
Biological Process	GO:0050920	6	regulation of chemotaxis	0.0635988	P05121	Plasminogen activator inhibitor 1	2.572	Up	0.0112754	SERPINE1	49.3	45.059	323.31	290	20	20	41	44	24	75	56	50	18	19	18	20	20	19	18	19	18	20	20	19	696760000	1081900000	342880000	3286900000	2170100000	1205400000	0.508	0.73	0.674	2.256	1.314	1.347
Biological Process	GO:0050920	6	regulation of chemotaxis	0.0635988	Q9GZP0	Platelet-derived growth factor D	16.251	Up	0.0095559	PDGFD	13.2	42.848	9.1286	11	4	4	1	0	1	2	2	5	1	1	1	3	3	4	1	1	1	3	3	4	175330	1553700	111740	11601000	7599100	8976200	0.037	0.307	0.063	2.331	1.347	2.936

## Sheet: UP-About vas
GO Terms Level 1	GO Terms ID	GO Terms Level	GO Terms Description	Fisher's exact test P value	Protein accession	Protein description	Ratio	Regulated Type	P value	Gene name	Sequence coverage [%]	Mol. weight [kDa]	Score	MS/MS Counts	Peptides	Unique peptides	MS/MS Count E1	MS/MS Count E2	MS/MS Count E3	MS/MS Count M1	MS/MS Count M2	MS/MS Count M3	Peptides E1	Peptides E2	Peptides E3	Peptides M1	Peptides M2	Peptides M3	Unique peptides E1	Unique peptides E2	Unique peptides E3	Unique peptides M1	Unique peptides M2	Unique peptides M3	iBAQ E1	iBAQ E2	iBAQ E3	iBAQ M1	iBAQ M2	iBAQ M3	E1	E2	E3	M1	M2	M3
Biological Process	GO:1901343	7	negative regulation of vasculature development	0.00461278	P08572	Collagen alpha-2(IV) chain	62.4	Up	1.65779e-05	COL4A2	24.6	167.55	323.31	96	29	29	1	1	0	26	43	25	4	3	2	24	25	22	4	3	2	24	25	22	977530	882140	266530	42672000	70553000	37748000	0.041	0.035	0.029	1.68	2.451	2.421
Biological Process	GO:1901343	7	negative regulation of vasculature development	0.00461278	P05121	Plasminogen activator inhibitor 1	2.572	Up	0.0112754	SERPINE1	49.3	45.059	323.31	290	20	20	41	44	24	75	56	50	18	19	18	20	20	19	18	19	18	20	20	19	696760000	1081900000	342880000	3286900000	2170100000	1205400000	0.508	0.73	0.674	2.256	1.314	1.347
Biological Process	GO:1901343	7	negative regulation of vasculature development	0.00461278	P36955	Pigment epithelium-derived factor	5.022	Up	0.042517	SERPINF1	31.1	46.312	90.643	59	13	9	6	4	5	13	17	14	5	6	5	11	12	12	1	2	1	7	8	8	24428000	22346000	22355000	75787000	187740000	197270000	0.296	0.25	0.729	0.862	1.885	3.656
Biological Process	GO:1901343	7	negative regulation of vasculature development	0.00461278	P07585	Decorin	45.345	Up	0.0174386	DCN	30.1	39.746	232.11	46	10	9	1	2	5	6	20	12	2	5	9	9	10	10	2	4	8	8	9	9	3435200	21371000	21981000	284750000	2299500000	1033400000	0.006	0.035	0.104	0.468	3.338	2.769
Biological Process	GO:0048844	11	artery morphogenesis	0.0363786	O14786	Neuropilin-1	13.08	Up	0.0148198	NRP1	9.2	103.13	64.877	11	6	6	1	0	1	1	4	4	1	1	1	3	6	5	1	1	1	3	6	5	126450	248210	86880	757100	3121500	2859100	0.112	0.204	0.207	0.634	2.307	3.9
Biological Process	GO:0048844	11	artery morphogenesis	0.0363786	P02461	Collagen alpha-1(III) chain	18.249	Up	0.00135962	COL3A1	55.5	138.56	323.31	349	60	45	21	9	10	97	117	95	28	18	15	56	57	57	18	12	9	42	42	42	57554000	29731000	34116000	850330000	1397000000	817160000	0.115	0.055	0.184	1.609	2.332	2.519
Biological Process	GO:0001944	8	vasculature development	2.04285e-05	O60687	Sushi repeat-containing protein SRPX2	19.744	Up	0.039323	SRPX2	33.8	52.971	82.027	42	12	12	1	0	0	13	17	11	4	2	1	12	12	12	4	2	1	12	12	12	5990700	596270	391460	51851000	62309000	32087000	0.251	0.023	0.043	2.04	2.163	2.056
Biological Process	GO:0001944	8	vasculature development	2.04285e-05	P08123	Collagen alpha-2(I) chain	7.798	Up	0.025324	COL1A2	68.7	129.31	323.31	518	61	60	60	54	19	146	96	143	52	48	28	60	59	59	51	47	27	59	58	58	278620000	258050000	34024000	1623600000	685150000	1723900000	0.387	0.332	0.127	2.127	0.792	3.678
Biological Process	GO:0001944	8	vasculature development	2.04285e-05	O14786	Neuropilin-1	13.08	Up	0.0148198	NRP1	9.2	103.13	64.877	11	6	6	1	0	1	1	4	4	1	1	1	3	6	5	1	1	1	3	6	5	126450	248210	86880	757100	3121500	2859100	0.112	0.204	0.207	0.634	2.307	3.9
Biological Process	GO:0001944	8	vasculature development	2.04285e-05	Q9Y4K0	Lysyl oxidase homolog 2	97.971	Up	0.00178461	LOXL2	39.8	86.724	323.31	106	26	26	2	0	0	33	40	31	3	3	1	25	26	24	3	3	1	25	26	24	666620	5011100	1170400	194120000	312420000	232340000	0.005	0.039	0.026	1.57	2.229	3.059
Biological Process	GO:0001944	8	vasculature development	2.04285e-05	P35579	Myosin-9	2.091	Up	0.042662	MYH9	33.2	226.53	323.31	219	57	45	38	21	11	44	74	31	41	36	21	48	55	43	33	30	19	38	45	35	14494000	8704600	4148000	18023000	38284000	14179000	0.949	0.527	0.732	1.111	2.082	1.424
Biological Process	GO:0001944	8	vasculature development	2.04285e-05	P02462	Collagen alpha-1(IV) chain	12.585	Up	0.0074763	COL4A1	7.3	160.61	38.958	27	8	5	1	1	0	11	8	6	2	1	2	7	7	6	0	0	0	4	5	4	1384800	707960	416020	14184000	16730000	8212900	0.213	0.101	0.173	2.054	2.137	1.938
Biological Process	GO:0001944	8	vasculature development	2.04285e-05	Q969H8	Myeloid-derived growth factor	6.651	Up	0.043878	MYDGF	24.9	18.795	41.03	12	3	3	0	0	0	3	5	4	1	2	1	3	3	3	1	2	1	3	3	3	1685700	7326800	159080	13437000	31893000	13028000	0.16	0.643	0.04	1.2	2.512	1.895
Biological Process	GO:0001944	8	vasculature development	2.04285e-05	P50281	Matrix metalloproteinase-14	6.248	Up	0.033159	MMP14	4.3	65.893	17.655	4	2	2	1	0	1	1	1	0	1	0	1	1	2	0	1	0	1	1	2	0	560520	0	338470	3749200	6850500	0	0.208		0.34	1.311	2.113
Biological Process	GO:0001944	8	vasculature development	2.04285e-05	P19022	Cadherin-2	10.125	Up	0.020937	CDH2	12.1	99.808	74.261	38	9	9	1	5	0	15	10	7	2	4	0	8	9	5	2	4	0	8	9	5	710180	2890000	0	22514000	22758000	7325000	0.067	0.254		2.013	1.795	1.067
Biological Process	GO:0001944	8	vasculature development	2.04285e-05	P02461	Collagen alpha-1(III) chain	18.249	Up	0.00135962	COL3A1	55.5	138.56	323.31	349	60	45	21	9	10	97	117	95	28	18	15	56	57	57	18	12	9	42	42	42	57554000	29731000	34116000	850330000	1397000000	817160000	0.115	0.055	0.184	1.609	2.332	2.519
Biological Process	GO:0001944	8	vasculature development	2.04285e-05	P08572	Collagen alpha-2(IV) chain	62.4	Up	1.65779e-05	COL4A2	24.6	167.55	323.31	96	29	29	1	1	0	26	43	25	4	3	2	24	25	22	4	3	2	24	25	22	977530	882140	266530	42672000	70553000	37748000	0.041	0.035	0.029	1.68	2.451	2.421
Biological Process	GO:0001944	8	vasculature development	2.04285e-05	Q14766	Latent-transforming growth factor beta-binding protein 1	4.831	Up	0.0028796	LTBP1	25.4	186.79	323.31	94	29	28	10	7	3	19	32	23	14	9	9	20	25	20	14	9	9	20	24	20	8951700	4890400	2393100	25294000	40787000	25227000	0.533	0.269	0.386	1.418	2.018	2.303
Biological Process	GO:0001944	8	vasculature development	2.04285e-05	P05121	Plasminogen activator inhibitor 1	2.572	Up	0.0112754	SERPINE1	49.3	45.059	323.31	290	20	20	41	44	24	75	56	50	18	19	18	20	20	19	18	19	18	20	20	19	696760000	1081900000	342880000	3286900000	2170100000	1205400000	0.508	0.73	0.674	2.256	1.314	1.347
Biological Process	GO:0001944	8	vasculature development	2.04285e-05	O00622	Protein CYR61	7.006	Up	0.027799	CYR61	27.3	42.026	33.987	23	8	8	3	2	2	8	5	3	5	2	3	7	6	5	5	2	3	7	6	5	7543100	2060100	876710	48582000	13641000	16819000	0.54	0.136	0.17	3.272	0.81	1.845
Biological Process	GO:0016525	9	negative regulation of angiogenesis	0.00358122	P08572	Collagen alpha-2(IV) chain	62.4	Up	1.65779e-05	COL4A2	24.6	167.55	323.31	96	29	29	1	1	0	26	43	25	4	3	2	24	25	22	4	3	2	24	25	22	977530	882140	266530	42672000	70553000	37748000	0.041	0.035	0.029	1.68	2.451	2.421
Biological Process	GO:0016525	9	negative regulation of angiogenesis	0.00358122	P05121	Plasminogen activator inhibitor 1	2.572	Up	0.0112754	SERPINE1	49.3	45.059	323.31	290	20	20	41	44	24	75	56	50	18	19	18	20	20	19	18	19	18	20	20	19	696760000	1081900000	342880000	3286900000	2170100000	1205400000	0.508	0.73	0.674	2.256	1.314	1.347
Biological Process	GO:0016525	9	negative regulation of angiogenesis	0.00358122	P36955	Pigment epithelium-derived factor	5.022	Up	0.042517	SERPINF1	31.1	46.312	90.643	59	13	9	6	4	5	13	17	14	5	6	5	11	12	12	1	2	1	7	8	8	24428000	22346000	22355000	75787000	187740000	197270000	0.296	0.25	0.729	0.862	1.885	3.656
Biological Process	GO:0016525	9	negative regulation of angiogenesis	0.00358122	P07585	Decorin	45.345	Up	0.0174386	DCN	30.1	39.746	232.11	46	10	9	1	2	5	6	20	12	2	5	9	9	10	10	2	4	8	8	9	9	3435200	21371000	21981000	284750000	2299500000	1033400000	0.006	0.035	0.104	0.468	3.338	2.769
Biological Process	GO:0001569	12	branching involved in blood vessel morphogenesis	0.0267594	O14786	Neuropilin-1	13.08	Up	0.0148198	NRP1	9.2	103.13	64.877	11	6	6	1	0	1	1	4	4	1	1	1	3	6	5	1	1	1	3	6	5	126450	248210	86880	757100	3121500	2859100	0.112	0.204	0.207	0.634	2.307	3.9
Biological Process	GO:0001569	12	branching involved in blood vessel morphogenesis	0.0267594	P02462	Collagen alpha-1(IV) chain	12.585	Up	0.0074763	COL4A1	7.3	160.61	38.958	27	8	5	1	1	0	11	8	6	2	1	2	7	7	6	0	0	0	4	5	4	1384800	707960	416020	14184000	16730000	8212900	0.213	0.101	0.173	2.054	2.137	1.938
Biological Process	GO:0043534	10	blood vessel endothelial cell migration	0.0183734	O14786	Neuropilin-1	13.08	Up	0.0148198	NRP1	9.2	103.13	64.877	11	6	6	1	0	1	1	4	4	1	1	1	3	6	5	1	1	1	3	6	5	126450	248210	86880	757100	3121500	2859100	0.112	0.204	0.207	0.634	2.307	3.9
Biological Process	GO:0043534	10	blood vessel endothelial cell migration	0.0183734	P35579	Myosin-9	2.091	Up	0.042662	MYH9	33.2	226.53	323.31	219	57	45	38	21	11	44	74	31	41	36	21	48	55	43	33	30	19	38	45	35	14494000	8704600	4148000	18023000	38284000	14179000	0.949	0.527	0.732	1.111	2.082	1.424
Biological Process	GO:0001525	11	angiogenesis	0.0002742	O60687	Sushi repeat-containing protein SRPX2	19.744	Up	0.039323	SRPX2	33.8	52.971	82.027	42	12	12	1	0	0	13	17	11	4	2	1	12	12	12	4	2	1	12	12	12	5990700	596270	391460	51851000	62309000	32087000	0.251	0.023	0.043	2.04	2.163	2.056
Biological Process	GO:0001525	11	angiogenesis	0.0002742	O14786	Neuropilin-1	13.08	Up	0.0148198	NRP1	9.2	103.13	64.877	11	6	6	1	0	1	1	4	4	1	1	1	3	6	5	1	1	1	3	6	5	126450	248210	86880	757100	3121500	2859100	0.112	0.204	0.207	0.634	2.307	3.9
Biological Process	GO:0001525	11	angiogenesis	0.0002742	Q9Y4K0	Lysyl oxidase homolog 2	97.971	Up	0.00178461	LOXL2	39.8	86.724	323.31	106	26	26	2	0	0	33	40	31	3	3	1	25	26	24	3	3	1	25	26	24	666620	5011100	1170400	194120000	312420000	232340000	0.005	0.039	0.026	1.57	2.229	3.059
Biological Process	GO:0001525	11	angiogenesis	0.0002742	P35579	Myosin-9	2.091	Up	0.042662	MYH9	33.2	226.53	323.31	219	57	45	38	21	11	44	74	31	41	36	21	48	55	43	33	30	19	38	45	35	14494000	8704600	4148000	18023000	38284000	14179000	0.949	0.527	0.732	1.111	2.082	1.424
Biological Process	GO:0001525	11	angiogenesis	0.0002742	P02462	Collagen alpha-1(IV) chain	12.585	Up	0.0074763	COL4A1	7.3	160.61	38.958	27	8	5	1	1	0	11	8	6	2	1	2	7	7	6	0	0	0	4	5	4	1384800	707960	416020	14184000	16730000	8212900	0.213	0.101	0.173	2.054	2.137	1.938
Biological Process	GO:0001525	11	angiogenesis	0.0002742	Q969H8	Myeloid-derived growth factor	6.651	Up	0.043878	MYDGF	24.9	18.795	41.03	12	3	3	0	0	0	3	5	4	1	2	1	3	3	3	1	2	1	3	3	3	1685700	7326800	159080	13437000	31893000	13028000	0.16	0.643	0.04	1.2	2.512	1.895
Biological Process	GO:0001525	11	angiogenesis	0.0002742	P50281	Matrix metalloproteinase-14	6.248	Up	0.033159	MMP14	4.3	65.893	17.655	4	2	2	1	0	1	1	1	0	1	0	1	1	2	0	1	0	1	1	2	0	560520	0	338470	3749200	6850500	0	0.208		0.34	1.311	2.113
Biological Process	GO:0001525	11	angiogenesis	0.0002742	P08572	Collagen alpha-2(IV) chain	62.4	Up	1.65779e-05	COL4A2	24.6	167.55	323.31	96	29	29	1	1	0	26	43	25	4	3	2	24	25	22	4	3	2	24	25	22	977530	882140	266530	42672000	70553000	37748000	0.041	0.035	0.029	1.68	2.451	2.421
Biological Process	GO:0001525	11	angiogenesis	0.0002742	P05121	Plasminogen activator inhibitor 1	2.572	Up	0.0112754	SERPINE1	49.3	45.059	323.31	290	20	20	41	44	24	75	56	50	18	19	18	20	20	19	18	19	18	20	20	19	696760000	1081900000	342880000	3286900000	2170100000	1205400000	0.508	0.73	0.674	2.256	1.314	1.347
Biological Process	GO:0001525	11	angiogenesis	0.0002742	O00622	Protein CYR61	7.006	Up	0.027799	CYR61	27.3	42.026	33.987	23	8	8	3	2	2	8	5	3	5	2	3	7	6	5	5	2	3	7	6	5	7543100	2060100	876710	48582000	13641000	16819000	0.54	0.136	0.17	3.272	0.81	1.845
Biological Process	GO:0060840	10	artery development	0.0144663	Q14766	Latent-transforming growth factor beta-binding protein 1	4.831	Up	0.0028796	LTBP1	25.4	186.79	323.31	94	29	28	10	7	3	19	32	23	14	9	9	20	25	20	14	9	9	20	24	20	8951700	4890400	2393100	25294000	40787000	25227000	0.533	0.269	0.386	1.418	2.018	2.303
Biological Process	GO:0060840	10	artery development	0.0144663	O14786	Neuropilin-1	13.08	Up	0.0148198	NRP1	9.2	103.13	64.877	11	6	6	1	0	1	1	4	4	1	1	1	3	6	5	1	1	1	3	6	5	126450	248210	86880	757100	3121500	2859100	0.112	0.204	0.207	0.634	2.307	3.9
Biological Process	GO:0060840	10	artery development	0.0144663	P02461	Collagen alpha-1(III) chain	18.249	Up	0.00135962	COL3A1	55.5	138.56	323.31	349	60	45	21	9	10	97	117	95	28	18	15	56	57	57	18	12	9	42	42	42	57554000	29731000	34116000	850330000	1397000000	817160000	0.115	0.055	0.184	1.609	2.332	2.519
Biological Process	GO:0030097	8	hemopoiesis	0.194888	P35579	Myosin-9	2.091	Up	0.042662	MYH9	33.2	226.53	323.31	219	57	45	38	21	11	44	74	31	41	36	21	48	55	43	33	30	19	38	45	35	14494000	8704600	4148000	18023000	38284000	14179000	0.949	0.527	0.732	1.111	2.082	1.424
Biological Process	GO:0030097	8	hemopoiesis	0.194888	P09382	Galectin-1	3.787	Up	0.00191859	LGALS1	64.4	14.716	282.85	94	8	8	15	18	8	17	19	17	7	8	6	8	8	8	7	8	6	8	8	8	273840000	282090000	69357000	724230000	1303200000	632750000	0.534	0.508	0.366	1.33	2.11	1.892
Biological Process	GO:0030097	8	hemopoiesis	0.194888	P08476	Inhibin beta A chain	24.045	Up	0.027082	INHBA	27.9	47.442	105.8	37	10	10	2	1	0	15	13	6	4	2	2	10	10	7	4	2	2	10	10	7	1176200	1032900	392470	51990000	22598000	5842500	0.091	0.074	0.081	3.776	1.448	0.691
Biological Process	GO:0030097	8	hemopoiesis	0.194888	Q04760	Lactoylglutathione lyase	6.734	Up	0.00094414	GLO1	10.3	20.777	2.4412	4	2	2	0	1	1	1	0	1	1	1	1	2	2	2	1	1	1	2	2	2	1221200	701100	387730	5921500	7231400	5222500	0.378	0.2	0.323	1.727	1.86	2.48
Biological Process	GO:1904018	7	positive regulation of vasculature development	0.00713981	O60687	Sushi repeat-containing protein SRPX2	19.744	Up	0.039323	SRPX2	33.8	52.971	82.027	42	12	12	1	0	0	13	17	11	4	2	1	12	12	12	4	2	1	12	12	12	5990700	596270	391460	51851000	62309000	32087000	0.251	0.023	0.043	2.04	2.163	2.056
Biological Process	GO:1904018	7	positive regulation of vasculature development	0.00713981	P05121	Plasminogen activator inhibitor 1	2.572	Up	0.0112754	SERPINE1	49.3	45.059	323.31	290	20	20	41	44	24	75	56	50	18	19	18	20	20	19	18	19	18	20	20	19	696760000	1081900000	342880000	3286900000	2170100000	1205400000	0.508	0.73	0.674	2.256	1.314	1.347
Biological Process	GO:1904018	7	positive regulation of vasculature development	0.00713981	Q969H8	Myeloid-derived growth factor	6.651	Up	0.043878	MYDGF	24.9	18.795	41.03	12	3	3	0	0	0	3	5	4	1	2	1	3	3	3	1	2	1	3	3	3	1685700	7326800	159080	13437000	31893000	13028000	0.16	0.643	0.04	1.2	2.512	1.895
Biological Process	GO:1904018	7	positive regulation of vasculature development	0.00713981	Q9GZP0	Platelet-derived growth factor D	16.251	Up	0.0095559	PDGFD	13.2	42.848	9.1286	11	4	4	1	0	1	2	2	5	1	1	1	3	3	4	1	1	1	3	3	4	175330	1553700	111740	11601000	7599100	8976200	0.037	0.307	0.063	2.331	1.347	2.936
Biological Process	GO:1904018	7	positive regulation of vasculature development	0.00713981	P01024	Complement C3	63.787	Up	0.044438	C3	35.5	187.15	289.83	92	48	39	0	0	0	26	18	48	12	9	10	36	32	47	3	0	1	27	23	38	224670	0	216400	11599000	4975900	41408000	0.02		0.055	0.998	0.378	5.8
Biological Process	GO:0048514	10	blood vessel morphogenesis	3.9717e-05	O60687	Sushi repeat-containing protein SRPX2	19.744	Up	0.039323	SRPX2	33.8	52.971	82.027	42	12	12	1	0	0	13	17	11	4	2	1	12	12	12	4	2	1	12	12	12	5990700	596270	391460	51851000	62309000	32087000	0.251	0.023	0.043	2.04	2.163	2.056
Biological Process	GO:0048514	10	blood vessel morphogenesis	3.9717e-05	O14786	Neuropilin-1	13.08	Up	0.0148198	NRP1	9.2	103.13	64.877	11	6	6	1	0	1	1	4	4	1	1	1	3	6	5	1	1	1	3	6	5	126450	248210	86880	757100	3121500	2859100	0.112	0.204	0.207	0.634	2.307	3.9
Biological Process	GO:0048514	10	blood vessel morphogenesis	3.9717e-05	Q9Y4K0	Lysyl oxidase homolog 2	97.971	Up	0.00178461	LOXL2	39.8	86.724	323.31	106	26	26	2	0	0	33	40	31	3	3	1	25	26	24	3	3	1	25	26	24	666620	5011100	1170400	194120000	312420000	232340000	0.005	0.039	0.026	1.57	2.229	3.059
Biological Process	GO:0048514	10	blood vessel morphogenesis	3.9717e-05	P35579	Myosin-9	2.091	Up	0.042662	MYH9	33.2	226.53	323.31	219	57	45	38	21	11	44	74	31	41	36	21	48	55	43	33	30	19	38	45	35	14494000	8704600	4148000	18023000	38284000	14179000	0.949	0.527	0.732	1.111	2.082	1.424
Biological Process	GO:0048514	10	blood vessel morphogenesis	3.9717e-05	P02462	Collagen alpha-1(IV) chain	12.585	Up	0.0074763	COL4A1	7.3	160.61	38.958	27	8	5	1	1	0	11	8	6	2	1	2	7	7	6	0	0	0	4	5	4	1384800	707960	416020	14184000	16730000	8212900	0.213	0.101	0.173	2.054	2.137	1.938
Biological Process	GO:0048514	10	blood vessel morphogenesis	3.9717e-05	Q969H8	Myeloid-derived growth factor	6.651	Up	0.043878	MYDGF	24.9	18.795	41.03	12	3	3	0	0	0	3	5	4	1	2	1	3	3	3	1	2	1	3	3	3	1685700	7326800	159080	13437000	31893000	13028000	0.16	0.643	0.04	1.2	2.512	1.895
Biological Process	GO:0048514	10	blood vessel morphogenesis	3.9717e-05	P50281	Matrix metalloproteinase-14	6.248	Up	0.033159	MMP14	4.3	65.893	17.655	4	2	2	1	0	1	1	1	0	1	0	1	1	2	0	1	0	1	1	2	0	560520	0	338470	3749200	6850500	0	0.208		0.34	1.311	2.113
Biological Process	GO:0048514	10	blood vessel morphogenesis	3.9717e-05	P19022	Cadherin-2	10.125	Up	0.020937	CDH2	12.1	99.808	74.261	38	9	9	1	5	0	15	10	7	2	4	0	8	9	5	2	4	0	8	9	5	710180	2890000	0	22514000	22758000	7325000	0.067	0.254		2.013	1.795	1.067
Biological Process	GO:0048514	10	blood vessel morphogenesis	3.9717e-05	P02461	Collagen alpha-1(III) chain	18.249	Up	0.00135962	COL3A1	55.5	138.56	323.31	349	60	45	21	9	10	97	117	95	28	18	15	56	57	57	18	12	9	42	42	42	57554000	29731000	34116000	850330000	1397000000	817160000	0.115	0.055	0.184	1.609	2.332	2.519
Biological Process	GO:0048514	10	blood vessel morphogenesis	3.9717e-05	P08572	Collagen alpha-2(IV) chain	62.4	Up	1.65779e-05	COL4A2	24.6	167.55	323.31	96	29	29	1	1	0	26	43	25	4	3	2	24	25	22	4	3	2	24	25	22	977530	882140	266530	42672000	70553000	37748000	0.041	0.035	0.029	1.68	2.451	2.421
Biological Process	GO:0048514	10	blood vessel morphogenesis	3.9717e-05	P05121	Plasminogen activator inhibitor 1	2.572	Up	0.0112754	SERPINE1	49.3	45.059	323.31	290	20	20	41	44	24	75	56	50	18	19	18	20	20	19	18	19	18	20	20	19	696760000	1081900000	342880000	3286900000	2170100000	1205400000	0.508	0.73	0.674	2.256	1.314	1.347
Biological Process	GO:0048514	10	blood vessel morphogenesis	3.9717e-05	O00622	Protein CYR61	7.006	Up	0.027799	CYR61	27.3	42.026	33.987	23	8	8	3	2	2	8	5	3	5	2	3	7	6	5	5	2	3	7	6	5	7543100	2060100	876710	48582000	13641000	16819000	0.54	0.136	0.17	3.272	0.81	1.845
Biological Process	GO:0045766	8	positive regulation of angiogenesis	0.0235386	O60687	Sushi repeat-containing protein SRPX2	19.744	Up	0.039323	SRPX2	33.8	52.971	82.027	42	12	12	1	0	0	13	17	11	4	2	1	12	12	12	4	2	1	12	12	12	5990700	596270	391460	51851000	62309000	32087000	0.251	0.023	0.043	2.04	2.163	2.056
Biological Process	GO:0045766	8	positive regulation of angiogenesis	0.0235386	P05121	Plasminogen activator inhibitor 1	2.572	Up	0.0112754	SERPINE1	49.3	45.059	323.31	290	20	20	41	44	24	75	56	50	18	19	18	20	20	19	18	19	18	20	20	19	696760000	1081900000	342880000	3286900000	2170100000	1205400000	0.508	0.73	0.674	2.256	1.314	1.347
Biological Process	GO:0045766	8	positive regulation of angiogenesis	0.0235386	Q969H8	Myeloid-derived growth factor	6.651	Up	0.043878	MYDGF	24.9	18.795	41.03	12	3	3	0	0	0	3	5	4	1	2	1	3	3	3	1	2	1	3	3	3	1685700	7326800	159080	13437000	31893000	13028000	0.16	0.643	0.04	1.2	2.512	1.895
Biological Process	GO:0045766	8	positive regulation of angiogenesis	0.0235386	P01024	Complement C3	63.787	Up	0.044438	C3	35.5	187.15	289.83	92	48	39	0	0	0	26	18	48	12	9	10	36	32	47	3	0	1	27	23	38	224670	0	216400	11599000	4975900	41408000	0.02		0.055	0.998	0.378	5.8
Biological Process	GO:0007599	5	hemostasis	0.00898402	P08123	Collagen alpha-2(I) chain	7.798	Up	0.025324	COL1A2	68.7	129.31	323.31	518	61	60	60	54	19	146	96	143	52	48	28	60	59	59	51	47	27	59	58	58	278620000	258050000	34024000	1623600000	685150000	1723900000	0.387	0.332	0.127	2.127	0.792	3.678
Biological Process	GO:0007599	5	hemostasis	0.00898402	P08758	Annexin A5	2.726	Up	0.0091631	ANXA5	46.6	35.936	105.18	76	14	14	12	14	7	12	18	13	10	13	11	14	13	12	10	13	11	14	13	12	74821000	120100000	31328000	179380000	350450000	181030000	0.511	0.759	0.579	1.155	1.989	1.897
Biological Process	GO:0007599	5	hemostasis	0.00898402	P35579	Myosin-9	2.091	Up	0.042662	MYH9	33.2	226.53	323.31	219	57	45	38	21	11	44	74	31	41	36	21	48	55	43	33	30	19	38	45	35	14494000	8704600	4148000	18023000	38284000	14179000	0.949	0.527	0.732	1.111	2.082	1.424
Biological Process	GO:0007599	5	hemostasis	0.00898402	P24844	Myosin regulatory light polypeptide 9	3.29	Up	0.026878	MYL9	56.4	19.827	9.1428	6	8	2	1	1	0	2	2	0	7	6	5	7	8	4	1	2	1	2	2	0	1332300	3010100	608760	7647700	6530500	0	0.371	0.777	0.458	2.009	1.513
Biological Process	GO:0007599	5	hemostasis	0.00898402	Q9GZP0	Platelet-derived growth factor D	16.251	Up	0.0095559	PDGFD	13.2	42.848	9.1286	11	4	4	1	0	1	2	2	5	1	1	1	3	3	4	1	1	1	3	3	4	175330	1553700	111740	11601000	7599100	8976200	0.037	0.307	0.063	2.331	1.347	2.936
Biological Process	GO:0007599	5	hemostasis	0.00898402	P02461	Collagen alpha-1(III) chain	18.249	Up	0.00135962	COL3A1	55.5	138.56	323.31	349	60	45	21	9	10	97	117	95	28	18	15	56	57	57	18	12	9	42	42	42	57554000	29731000	34116000	850330000	1397000000	817160000	0.115	0.055	0.184	1.609	2.332	2.519
Biological Process	GO:0007599	5	hemostasis	0.00898402	Q9UNN8	Endothelial protein C receptor	4.576	Up	0.026459	PROCR	3.8	26.671	1.5589	2	1	1	0	0	0	1	1	0	1	1	1	1	1	1	1	1	1	1	1	1	669160	1232300	170330	3702900	4083400	2281000	0.353	0.601	0.242	1.839	1.789	1.845
Biological Process	GO:0007599	5	hemostasis	0.00898402	P07093	Glia-derived nexin	11.771	Up	0.0067036	SERPINE2	46.2	44.002	169.23	127	17	17	12	5	6	33	47	24	12	9	9	16	16	14	12	9	9	16	16	14	132430000	37889000	41650000	871260000	2057200000	504660000	0.233	0.061	0.199	1.441	3.002	1.36

## Sheet: hAESCs-CM high expression ALL
GO Terms Level 1	GO Terms ID	GO Terms Level	GO Terms Description	Fisher's exact test P value	Protein accession	Protein description	Ratio	Regulated Type	P value	Gene name	Sequence coverage [%]	Mol. weight [kDa]	Score	MS/MS Counts	Peptides	Unique peptides	MS/MS Count E1	MS/MS Count E2	MS/MS Count E3	MS/MS Count M1	MS/MS Count M2	MS/MS Count M3	Peptides E1	Peptides E2	Peptides E3	Peptides M1	Peptides M2	Peptides M3	Unique peptides E1	Unique peptides E2	Unique peptides E3	Unique peptides M1	Unique peptides M2	Unique peptides M3	iBAQ E1	iBAQ E2	iBAQ E3	iBAQ M1	iBAQ M2	iBAQ M3	E1	E2	E3	M1	M2	M3
Biological Process	GO:0002064	7	epithelial cell development	0.122402	P15311	Ezrin	0.48	Down	0.04462	EZR	28.2	69.412	100.17	39	16	7	10	6	10	6	4	3	15	15	14	12	14	11	6	6	6	4	5	4	58827000	57090000	37494000	46846000	33357000	19834000	1.487	1.335	2.559	1.115	0.7	0.769
Biological Process	GO:0002064	7	epithelial cell development	0.122402	P31947	14-3-3 protein sigma	0.409	Down	0.0101	SFN	37.1	27.774	127.26	38	9	6	12	8	8	4	4	2	7	8	9	5	7	4	6	5	6	4	4	2	228810000	234060000	120350000	134190000	134760000	50257000	1.623	1.536	2.305	0.896	0.794	0.547
Biological Process	GO:0002064	7	epithelial cell development	0.122402	O75369	Filamin-B	0.17	Down	0.031543	FLNB	48	278.16	323.31	394	95	84	137	67	76	30	57	27	93	67	74	46	66	42	83	58	65	38	57	34	146720000	33897000	30485000	9872100	25121000	9145800	3.681	0.787	2.066	0.233	0.524	0.352
Biological Process	GO:0002920	6	regulation of humoral immune response	0.0986248	P02790	Hemopexin	0.363	Down	0.046037	HPX	2.8	51.676	12.412	7	1	1	1	2	1	1	1	1	1	1	1	1	1	1	1	1	1	1	1	1	13348000	16477000	12047000	7938200	6012200	6343600	1.375	1.57	3.352	0.77	0.514	1.002
Biological Process	GO:0002920	6	regulation of humoral immune response	0.0986248	P0C0L5	Complement C4-B	0.056	Down	0.00093612	C4B	5.8	192.75	29.031	4	10	2	2	1	0	0	1	0	9	7	9	8	9	9	1	1	1	1	1	1	1729100	1709300	824490	177700	66202	57463	2.426	2.218	3.124	0.235	0.077	0.124
Biological Process	GO:1902806	8	regulation of cell cycle G1/S phase transition	0.178114	P31947	14-3-3 protein sigma	0.409	Down	0.0101	SFN	37.1	27.774	127.26	38	9	6	12	8	8	4	4	2	7	8	9	5	7	4	6	5	6	4	4	2	228810000	234060000	120350000	134190000	134760000	50257000	1.623	1.536	2.305	0.896	0.794	0.547
Biological Process	GO:1902806	8	regulation of cell cycle G1/S phase transition	0.178114	Q71UM5	40S ribosomal protein S27-like	0.504	Down	0.011282	RPS27L	22.6	9.4771	3.0926	6	2	2	2	1	1	1	1	0	2	1	1	2	2	1	2	1	1	2	2	1	19902000	14524000	6724600	7879900	12400000	5365600	1.908	1.288	1.741	0.712	0.988	0.789
Biological Process	GO:1901991	9	negative regulation of mitotic cell cycle phase transition	0.046656	Q15008	26S proteasome non-ATPase regulatory subunit 6	0.606	Down	0.0119007	PSMD6	12.1	45.531	27.239	19	4	4	2	6	2	2	4	3	4	4	4	4	4	3	4	4	4	4	4	3	4391200	6771400	1781900	3371600	3502000	2140300	1.281	1.826	1.403	0.926	0.848	0.957
Biological Process	GO:1901991	9	negative regulation of mitotic cell cycle phase transition	0.046656	P31947	14-3-3 protein sigma	0.409	Down	0.0101	SFN	37.1	27.774	127.26	38	9	6	12	8	8	4	4	2	7	8	9	5	7	4	6	5	6	4	4	2	228810000	234060000	120350000	134190000	134760000	50257000	1.623	1.536	2.305	0.896	0.794	0.547
Biological Process	GO:1901991	9	negative regulation of mitotic cell cycle phase transition	0.046656	Q71UM5	40S ribosomal protein S27-like	0.504	Down	0.011282	RPS27L	22.6	9.4771	3.0926	6	2	2	2	1	1	1	1	0	2	1	1	2	2	1	2	1	1	2	2	1	19902000	14524000	6724600	7879900	12400000	5365600	1.908	1.288	1.741	0.712	0.988	0.789
Biological Process	GO:1901991	9	negative regulation of mitotic cell cycle phase transition	0.046656	P28070	Proteasome subunit beta type-4	0.448	Down	0.02462	PSMB4	31.1	29.204	27.088	19	6	6	5	4	1	5	3	1	4	5	3	4	6	3	4	5	3	4	6	3	39270000	57148000	29814000	25419000	34915000	15876000	1.242	1.672	2.548	0.757	0.918	0.771
Biological Process	GO:1901991	9	negative regulation of mitotic cell cycle phase transition	0.046656	P28072	Proteasome subunit beta type-6	0.512	Down	0.0156837	PSMB6	13	25.357	8.82	10	3	3	3	2	2	1	1	1	3	2	2	2	2	2	3	2	2	2	2	2	34720000	52874000	20617000	27921000	24247000	16250000	1.258	1.773	2.017	0.953	0.73	0.903
Biological Process	GO:0042246	6	tissue regeneration	0.0751207	P06396	Gelsolin	0.08	Down	0.044536	GSN	33.6	85.696	256.43	35	20	8	12	7	11	3	1	1	19	16	18	15	14	15	7	5	7	4	2	4	49607000	15273000	50188000	2030000	3091500	7460400	2.489	0.709	6.798	0.095	0.129	0.574
Biological Process	GO:0042246	6	tissue regeneration	0.0751207	Q13765	Nascent polypeptide-associated complex subunit alpha	0.64	Down	0.0161794	NACA	19.5	23.384	62.673	18	3	3	3	4	2	3	4	2	3	3	3	3	3	3	3	3	3	3	3	3	42791000	33209000	15152000	26652000	27390000	16509000	1.695	1.216	1.62	0.994	0.901	1.003
Biological Process	GO:1902807	9	negative regulation of cell cycle G1/S phase transition	0.0538061	P31947	14-3-3 protein sigma	0.409	Down	0.0101	SFN	37.1	27.774	127.26	38	9	6	12	8	8	4	4	2	7	8	9	5	7	4	6	5	6	4	4	2	228810000	234060000	120350000	134190000	134760000	50257000	1.623	1.536	2.305	0.896	0.794	0.547
Biological Process	GO:1902807	9	negative regulation of cell cycle G1/S phase transition	0.0538061	Q71UM5	40S ribosomal protein S27-like	0.504	Down	0.011282	RPS27L	22.6	9.4771	3.0926	6	2	2	2	1	1	1	1	0	2	1	1	2	2	1	2	1	1	2	2	1	19902000	14524000	6724600	7879900	12400000	5365600	1.908	1.288	1.741	0.712	0.988	0.789
Biological Process	GO:0000278	5	mitotic cell cycle	0.142402	P68366	Tubulin alpha-4A chain	0.103	Down	0.0024179	TUBA4A	52.2	49.924	14.147	14	18	3	4	6	4	0	0	0	17	17	15	15	16	14	3	3	3	2	2	1	6461800	3976500	3525500	916580	835930	310760	2.582	1.47	3.804	0.345	0.277	0.19
Biological Process	GO:0000278	5	mitotic cell cycle	0.142402	Q15008	26S proteasome non-ATPase regulatory subunit 6	0.606	Down	0.0119007	PSMD6	12.1	45.531	27.239	19	4	4	2	6	2	2	4	3	4	4	4	4	4	3	4	4	4	4	4	3	4391200	6771400	1781900	3371600	3502000	2140300	1.281	1.826	1.403	0.926	0.848	0.957
Biological Process	GO:0000278	5	mitotic cell cycle	0.142402	P31947	14-3-3 protein sigma	0.409	Down	0.0101	SFN	37.1	27.774	127.26	38	9	6	12	8	8	4	4	2	7	8	9	5	7	4	6	5	6	4	4	2	228810000	234060000	120350000	134190000	134760000	50257000	1.623	1.536	2.305	0.896	0.794	0.547
Biological Process	GO:0000278	5	mitotic cell cycle	0.142402	Q71UM5	40S ribosomal protein S27-like	0.504	Down	0.011282	RPS27L	22.6	9.4771	3.0926	6	2	2	2	1	1	1	1	0	2	1	1	2	2	1	2	1	1	2	2	1	19902000	14524000	6724600	7879900	12400000	5365600	1.908	1.288	1.741	0.712	0.988	0.789
Biological Process	GO:0000278	5	mitotic cell cycle	0.142402	P28070	Proteasome subunit beta type-4	0.448	Down	0.02462	PSMB4	31.1	29.204	27.088	19	6	6	5	4	1	5	3	1	4	5	3	4	6	3	4	5	3	4	6	3	39270000	57148000	29814000	25419000	34915000	15876000	1.242	1.672	2.548	0.757	0.918	0.771
Biological Process	GO:0000278	5	mitotic cell cycle	0.142402	Q99502	Eyes absent homolog 1	0.666	Down	0.0189799	EYA1	2.4	64.593	1.9129	3	1	1	2	0	1	0	0	0	1	1	1	1	1	0	1	1	1	1	1	0	30608000	38388000	10608000	23193000	24338000	0	1.285	1.491	1.202	0.917	0.848
Biological Process	GO:0000278	5	mitotic cell cycle	0.142402	P28072	Proteasome subunit beta type-6	0.512	Down	0.0156837	PSMB6	13	25.357	8.82	10	3	3	3	2	2	1	1	1	3	2	2	2	2	2	3	2	2	2	2	2	34720000	52874000	20617000	27921000	24247000	16250000	1.258	1.773	2.017	0.953	0.73	0.903
Biological Process	GO:0000278	5	mitotic cell cycle	0.142402	Q9HD42	Charged multivesicular body protein 1a	0.449	Down	0.035704	CHMP1A	8.7	21.703	2.4011	2	2	2	1	1	0	0	0	0	2	1	0	1	0	1	2	1	0	1	0	1	1763200	1465100	0	683640	0	493620	1.709	1.313		0.624		0.733
Biological Process	GO:0044773	10	mitotic DNA damage checkpoint	0.0441237	P31947	14-3-3 protein sigma	0.409	Down	0.0101	SFN	37.1	27.774	127.26	38	9	6	12	8	8	4	4	2	7	8	9	5	7	4	6	5	6	4	4	2	228810000	234060000	120350000	134190000	134760000	50257000	1.623	1.536	2.305	0.896	0.794	0.547
Biological Process	GO:0044773	10	mitotic DNA damage checkpoint	0.0441237	Q71UM5	40S ribosomal protein S27-like	0.504	Down	0.011282	RPS27L	22.6	9.4771	3.0926	6	2	2	2	1	1	1	1	0	2	1	1	2	2	1	2	1	1	2	2	1	19902000	14524000	6724600	7879900	12400000	5365600	1.908	1.288	1.741	0.712	0.988	0.789
Biological Process	GO:0002520	6	immune system development	0.213349	P27361	Mitogen-activated protein kinase 3	0.15	Down	0.00097886	MAPK3	18.5	43.135	10.767	8	6	4	4	2	1	0	0	1	6	6	4	3	3	2	4	4	2	1	1	1	4404100	3320400	1138100	783840	489290	288570	2.705	1.886	1.888	0.453	0.25	0.272
Biological Process	GO:0002520	6	immune system development	0.213349	Q02750	Dual specificity mitogen-activated protein kinase kinase 1	0.054	Down	0.033299	MAP2K1	5.1	43.439	8.485	4	3	3	0	0	1	2	1	0	1	2	2	3	3	2	1	2	2	3	3	2	593720000	145040000	660540000	69996000	34750000	26518000	2.483	0.562	7.461	0.275	0.121	0.17
Biological Process	GO:0002520	6	immune system development	0.213349	P35611	Alpha-adducin	0.215	Down	0.0068965	ADD1	3.7	80.954	3.8563	5	2	2	1	2	1	1	0	0	2	2	1	1	1	1	2	2	1	1	1	1	536390	561270	240280	187010	74761	83846	2.041	1.974	2.467	0.669	0.236	0.489
Biological Process	GO:0002520	6	immune system development	0.213349	P07355	Annexin A2	0.279	Down	0.0059359	ANXA2	62.8	38.604	323.31	168	18	18	43	25	27	26	27	20	18	14	16	15	16	16	18	14	16	15	16	16	887470000	518070000	335260000	243040000	203670000	153130000	2.428	1.311	2.476	0.626	0.463	0.643
Biological Process	GO:0030855	6	epithelial cell differentiation	0.0915757	P09525	Annexin A4	0.077	Down	0.00179778	ANXA4	33.9	35.882	45.905	25	9	9	9	4	6	3	1	2	9	6	6	4	4	2	9	6	6	4	4	2	28347000	12449000	4391100	1711400	1752000	611990	3.685	1.497	1.542	0.209	0.189	0.123
Biological Process	GO:0030855	6	epithelial cell differentiation	0.0915757	Q02750	Dual specificity mitogen-activated protein kinase kinase 1	0.054	Down	0.033299	MAP2K1	5.1	43.439	8.485	4	3	3	0	0	1	2	1	0	1	2	2	3	3	2	1	2	2	3	3	2	593720000	145040000	660540000	69996000	34750000	26518000	2.483	0.562	7.461	0.275	0.121	0.17
Biological Process	GO:0030855	6	epithelial cell differentiation	0.0915757	P15311	Ezrin	0.48	Down	0.04462	EZR	28.2	69.412	100.17	39	16	7	10	6	10	6	4	3	15	15	14	12	14	11	6	6	6	4	5	4	58827000	57090000	37494000	46846000	33357000	19834000	1.487	1.335	2.559	1.115	0.7	0.769
Biological Process	GO:0030855	6	epithelial cell differentiation	0.0915757	P31947	14-3-3 protein sigma	0.409	Down	0.0101	SFN	37.1	27.774	127.26	38	9	6	12	8	8	4	4	2	7	8	9	5	7	4	6	5	6	4	4	2	228810000	234060000	120350000	134190000	134760000	50257000	1.623	1.536	2.305	0.896	0.794	0.547
Biological Process	GO:0030855	6	epithelial cell differentiation	0.0915757	O75369	Filamin-B	0.17	Down	0.031543	FLNB	48	278.16	323.31	394	95	84	137	67	76	30	57	27	93	67	74	46	66	42	83	58	65	38	57	34	146720000	33897000	30485000	9872100	25121000	9145800	3.681	0.787	2.066	0.233	0.524	0.352
Biological Process	GO:0030855	6	epithelial cell differentiation	0.0915757	Q99502	Eyes absent homolog 1	0.666	Down	0.0189799	EYA1	2.4	64.593	1.9129	3	1	1	2	0	1	0	0	0	1	1	1	1	1	0	1	1	1	1	1	0	30608000	38388000	10608000	23193000	24338000	0	1.285	1.491	1.202	0.917	0.848
Biological Process	GO:0048589	4	developmental growth	0.248666	P06396	Gelsolin	0.08	Down	0.044536	GSN	33.6	85.696	256.43	35	20	8	12	7	11	3	1	1	19	16	18	15	14	15	7	5	7	4	2	4	49607000	15273000	50188000	2030000	3091500	7460400	2.489	0.709	6.798	0.095	0.129	0.574
Biological Process	GO:0048589	4	developmental growth	0.248666	Q13765	Nascent polypeptide-associated complex subunit alpha	0.64	Down	0.0161794	NACA	19.5	23.384	62.673	18	3	3	3	4	2	3	4	2	3	3	3	3	3	3	3	3	3	3	3	3	42791000	33209000	15152000	26652000	27390000	16509000	1.695	1.216	1.62	0.994	0.901	1.003
Biological Process	GO:0048589	4	developmental growth	0.248666	P35611	Alpha-adducin	0.215	Down	0.0068965	ADD1	3.7	80.954	3.8563	5	2	2	1	2	1	1	0	0	2	2	1	1	1	1	2	2	1	1	1	1	536390	561270	240280	187010	74761	83846	2.041	1.974	2.467	0.669	0.236	0.489
Biological Process	GO:0040007	2	growth	0.312653	P06396	Gelsolin	0.08	Down	0.044536	GSN	33.6	85.696	256.43	35	20	8	12	7	11	3	1	1	19	16	18	15	14	15	7	5	7	4	2	4	49607000	15273000	50188000	2030000	3091500	7460400	2.489	0.709	6.798	0.095	0.129	0.574
Biological Process	GO:0040007	2	growth	0.312653	Q13765	Nascent polypeptide-associated complex subunit alpha	0.64	Down	0.0161794	NACA	19.5	23.384	62.673	18	3	3	3	4	2	3	4	2	3	3	3	3	3	3	3	3	3	3	3	3	42791000	33209000	15152000	26652000	27390000	16509000	1.695	1.216	1.62	0.994	0.901	1.003
Biological Process	GO:0040007	2	growth	0.312653	P35611	Alpha-adducin	0.215	Down	0.0068965	ADD1	3.7	80.954	3.8563	5	2	2	1	2	1	1	0	0	2	2	1	1	1	1	2	2	1	1	1	1	536390	561270	240280	187010	74761	83846	2.041	1.974	2.467	0.669	0.236	0.489
Biological Process	GO:2000377	6	regulation of reactive oxygen species metabolic process	0.322288	P00738	Haptoglobin	0.203	Down	0.022302	HP	12.3	45.205	11.888	29	6	6	3	4	7	4	7	4	6	5	6	5	5	5	6	5	6	5	5	5	156470000	134410000	151310000	32949000	62841000	36987000	1.743	1.385	4.55	0.346	0.582	0.632
Biological Process	GO:2000377	6	regulation of reactive oxygen species metabolic process	0.322288	P10909	Clusterin	0.183	Down	0.027979	CLU	27.6	52.494	323.31	70	10	10	15	16	18	4	9	8	10	10	10	8	10	9	10	10	10	8	10	9	237020000	262030000	253660000	33505000	102090000	62773000	1.596	1.632	4.611	0.212	0.571	0.648
Biological Process	GO:0007049	4	cell cycle	0.102786	Q02750	Dual specificity mitogen-activated protein kinase kinase 1	0.054	Down	0.033299	MAP2K1	5.1	43.439	8.485	4	3	3	0	0	1	2	1	0	1	2	2	3	3	2	1	2	2	3	3	2	593720000	145040000	660540000	69996000	34750000	26518000	2.483	0.562	7.461	0.275	0.121	0.17
Biological Process	GO:0007049	4	cell cycle	0.102786	P15311	Ezrin	0.48	Down	0.04462	EZR	28.2	69.412	100.17	39	16	7	10	6	10	6	4	3	15	15	14	12	14	11	6	6	6	4	5	4	58827000	57090000	37494000	46846000	33357000	19834000	1.487	1.335	2.559	1.115	0.7	0.769
Biological Process	GO:0007049	4	cell cycle	0.102786	P68366	Tubulin alpha-4A chain	0.103	Down	0.0024179	TUBA4A	52.2	49.924	14.147	14	18	3	4	6	4	0	0	0	17	17	15	15	16	14	3	3	3	2	2	1	6461800	3976500	3525500	916580	835930	310760	2.582	1.47	3.804	0.345	0.277	0.19
Biological Process	GO:0007049	4	cell cycle	0.102786	Q15008	26S proteasome non-ATPase regulatory subunit 6	0.606	Down	0.0119007	PSMD6	12.1	45.531	27.239	19	4	4	2	6	2	2	4	3	4	4	4	4	4	3	4	4	4	4	4	3	4391200	6771400	1781900	3371600	3502000	2140300	1.281	1.826	1.403	0.926	0.848	0.957
Biological Process	GO:0007049	4	cell cycle	0.102786	P31947	14-3-3 protein sigma	0.409	Down	0.0101	SFN	37.1	27.774	127.26	38	9	6	12	8	8	4	4	2	7	8	9	5	7	4	6	5	6	4	4	2	228810000	234060000	120350000	134190000	134760000	50257000	1.623	1.536	2.305	0.896	0.794	0.547
Biological Process	GO:0007049	4	cell cycle	0.102786	Q71UM5	40S ribosomal protein S27-like	0.504	Down	0.011282	RPS27L	22.6	9.4771	3.0926	6	2	2	2	1	1	1	1	0	2	1	1	2	2	1	2	1	1	2	2	1	19902000	14524000	6724600	7879900	12400000	5365600	1.908	1.288	1.741	0.712	0.988	0.789
Biological Process	GO:0007049	4	cell cycle	0.102786	P28070	Proteasome subunit beta type-4	0.448	Down	0.02462	PSMB4	31.1	29.204	27.088	19	6	6	5	4	1	5	3	1	4	5	3	4	6	3	4	5	3	4	6	3	39270000	57148000	29814000	25419000	34915000	15876000	1.242	1.672	2.548	0.757	0.918	0.771
Biological Process	GO:0007049	4	cell cycle	0.102786	Q99502	Eyes absent homolog 1	0.666	Down	0.0189799	EYA1	2.4	64.593	1.9129	3	1	1	2	0	1	0	0	0	1	1	1	1	1	0	1	1	1	1	1	0	30608000	38388000	10608000	23193000	24338000	0	1.285	1.491	1.202	0.917	0.848
Biological Process	GO:0007049	4	cell cycle	0.102786	P27361	Mitogen-activated protein kinase 3	0.15	Down	0.00097886	MAPK3	18.5	43.135	10.767	8	6	4	4	2	1	0	0	1	6	6	4	3	3	2	4	4	2	1	1	1	4404100	3320400	1138100	783840	489290	288570	2.705	1.886	1.888	0.453	0.25	0.272
Biological Process	GO:0007049	4	cell cycle	0.102786	P28072	Proteasome subunit beta type-6	0.512	Down	0.0156837	PSMB6	13	25.357	8.82	10	3	3	3	2	2	1	1	1	3	2	2	2	2	2	3	2	2	2	2	2	34720000	52874000	20617000	27921000	24247000	16250000	1.258	1.773	2.017	0.953	0.73	0.903
Biological Process	GO:0007049	4	cell cycle	0.102786	Q9HD42	Charged multivesicular body protein 1a	0.449	Down	0.035704	CHMP1A	8.7	21.703	2.4011	2	2	2	1	1	0	0	0	0	2	1	0	1	0	1	2	1	0	1	0	1	1763200	1465100	0	683640	0	493620	1.709	1.313		0.624		0.733
Biological Process	GO:0000902	6	cell morphogenesis	0.0493104	P33176	Kinesin-1 heavy chain	0.546	Down	0.042524	KIF5B	13.2	109.68	22.62	28	10	6	6	6	0	6	6	4	8	7	4	7	8	4	5	6	3	5	5	2	1483700	1633300	521690	714650	1230600	463370	1.571	1.6	1.493	0.713	1.082	0.753
Biological Process	GO:0000902	6	cell morphogenesis	0.0493104	P06703	Protein S100-A6	0.274	Down	0.021297	S100A6	24.4	10.18	10.14	12	3	3	3	1	2	2	2	2	3	2	2	2	3	2	3	2	2	2	3	2	2411700000	1068100000	678150000	324630000	551200000	437870000	2.823	1.156	2.144	0.358	0.535	0.786
Biological Process	GO:0000902	6	cell morphogenesis	0.0493104	P10909	Clusterin	0.183	Down	0.027979	CLU	27.6	52.494	323.31	70	10	10	15	16	18	4	9	8	10	10	10	8	10	9	10	10	10	8	10	9	237020000	262030000	253660000	33505000	102090000	62773000	1.596	1.632	4.611	0.212	0.571	0.648
Biological Process	GO:0000902	6	cell morphogenesis	0.0493104	P15311	Ezrin	0.48	Down	0.04462	EZR	28.2	69.412	100.17	39	16	7	10	6	10	6	4	3	15	15	14	12	14	11	6	6	6	4	5	4	58827000	57090000	37494000	46846000	33357000	19834000	1.487	1.335	2.559	1.115	0.7	0.769
Biological Process	GO:0000902	6	cell morphogenesis	0.0493104	O75369	Filamin-B	0.17	Down	0.031543	FLNB	48	278.16	323.31	394	95	84	137	67	76	30	57	27	93	67	74	46	66	42	83	58	65	38	57	34	146720000	33897000	30485000	9872100	25121000	9145800	3.681	0.787	2.066	0.233	0.524	0.352
Biological Process	GO:0000902	6	cell morphogenesis	0.0493104	Q8WVM8	Sec1 family domain-containing protein 1	0.595	Down	0.0143556	SCFD1	9.8	72.379	13.163	16	4	4	4	4	1	3	3	1	4	4	3	3	2	3	4	4	3	3	2	3	1076500	1301600	358700	580110	716860	514700	1.515	1.695	1.363	0.769	0.839	1.111
Biological Process	GO:0000902	6	cell morphogenesis	0.0493104	P27361	Mitogen-activated protein kinase 3	0.15	Down	0.00097886	MAPK3	18.5	43.135	10.767	8	6	4	4	2	1	0	0	1	6	6	4	3	3	2	4	4	2	1	1	1	4404100	3320400	1138100	783840	489290	288570	2.705	1.886	1.888	0.453	0.25	0.272
Biological Process	GO:0000902	6	cell morphogenesis	0.0493104	P35611	Alpha-adducin	0.215	Down	0.0068965	ADD1	3.7	80.954	3.8563	5	2	2	1	2	1	1	0	0	2	2	1	1	1	1	2	2	1	1	1	1	536390	561270	240280	187010	74761	83846	2.041	1.974	2.467	0.669	0.236	0.489
Biological Process	GO:0060341	5	regulation of cellular localization	0.00652233	P33176	Kinesin-1 heavy chain	0.546	Down	0.042524	KIF5B	13.2	109.68	22.62	28	10	6	6	6	0	6	6	4	8	7	4	7	8	4	5	6	3	5	5	2	1483700	1633300	521690	714650	1230600	463370	1.571	1.6	1.493	0.713	1.082	0.753
Biological Process	GO:0060341	5	regulation of cellular localization	0.00652233	Q02750	Dual specificity mitogen-activated protein kinase kinase 1	0.054	Down	0.033299	MAP2K1	5.1	43.439	8.485	4	3	3	0	0	1	2	1	0	1	2	2	3	3	2	1	2	2	3	3	2	593720000	145040000	660540000	69996000	34750000	26518000	2.483	0.562	7.461	0.275	0.121	0.17
Biological Process	GO:0060341	5	regulation of cellular localization	0.00652233	P15311	Ezrin	0.48	Down	0.04462	EZR	28.2	69.412	100.17	39	16	7	10	6	10	6	4	3	15	15	14	12	14	11	6	6	6	4	5	4	58827000	57090000	37494000	46846000	33357000	19834000	1.487	1.335	2.559	1.115	0.7	0.769
Biological Process	GO:0060341	5	regulation of cellular localization	0.00652233	P55786	Puromycin-sensitive aminopeptidase	0.646	Down	0.0047385	NPEPPS	23.6	103.28	87.105	74	20	20	16	18	11	11	10	8	19	19	15	17	18	15	19	19	15	17	18	15	21471000	21638000	8537000	15473000	14640000	9777900	1.502	1.4	1.614	1.019	0.851	1.049
Biological Process	GO:0060341	5	regulation of cellular localization	0.00652233	P31947	14-3-3 protein sigma	0.409	Down	0.0101	SFN	37.1	27.774	127.26	38	9	6	12	8	8	4	4	2	7	8	9	5	7	4	6	5	6	4	4	2	228810000	234060000	120350000	134190000	134760000	50257000	1.623	1.536	2.305	0.896	0.794	0.547
Biological Process	GO:0060341	5	regulation of cellular localization	0.00652233	P07355	Annexin A2	0.279	Down	0.0059359	ANXA2	62.8	38.604	323.31	168	18	18	43	25	27	26	27	20	18	14	16	15	16	16	18	14	16	15	16	16	887470000	518070000	335260000	243040000	203670000	153130000	2.428	1.311	2.476	0.626	0.463	0.643
Biological Process	GO:0060341	5	regulation of cellular localization	0.00652233	P63027	Vesicle-associated membrane protein 2	0.331	Down	0.036182	VAMP2	34.5	12.663	33.653	11	3	3	2	4	2	2	0	1	2	3	2	2	0	1	2	3	2	2	0	1	45569000	53661000	9792800	11188000	0	10638000	1.858	2.024	1.078	0.43		0.664
Biological Process	GO:0060341	5	regulation of cellular localization	0.00652233	Q8WVM8	Sec1 family domain-containing protein 1	0.595	Down	0.0143556	SCFD1	9.8	72.379	13.163	16	4	4	4	4	1	3	3	1	4	4	3	3	2	3	4	4	3	3	2	3	1076500	1301600	358700	580110	716860	514700	1.515	1.695	1.363	0.769	0.839	1.111
Biological Process	GO:0060341	5	regulation of cellular localization	0.00652233	P27361	Mitogen-activated protein kinase 3	0.15	Down	0.00097886	MAPK3	18.5	43.135	10.767	8	6	4	4	2	1	0	0	1	6	6	4	3	3	2	4	4	2	1	1	1	4404100	3320400	1138100	783840	489290	288570	2.705	1.886	1.888	0.453	0.25	0.272
Biological Process	GO:0060341	5	regulation of cellular localization	0.00652233	P06396	Gelsolin	0.08	Down	0.044536	GSN	33.6	85.696	256.43	35	20	8	12	7	11	3	1	1	19	16	18	15	14	15	7	5	7	4	2	4	49607000	15273000	50188000	2030000	3091500	7460400	2.489	0.709	6.798	0.095	0.129	0.574
Biological Process	GO:0060341	5	regulation of cellular localization	0.00652233	P30626	Sorcin	0.595	Down	0.03778	SRI	19.2	21.676	5.1204	6	4	4	1	2	1	1	0	1	2	2	3	3	2	2	2	2	3	3	2	2	5839500	4973700	2891400	3483400	4286600	2614300	1.552	1.223	2.075	0.872	0.947	1.065
Biological Process	GO:0060341	5	regulation of cellular localization	0.00652233	P63104	14-3-3 protein zeta/delta	0.542	Down	0.023519	YWHAZ	52.7	27.745	178.96	94	14	9	21	12	15	14	19	13	12	13	14	12	14	13	9	9	9	9	9	9	587250000	588370000	233670000	386150000	448830000	142490000	1.575	1.46	1.692	0.976	1	0.586
Biological Process	GO:0007568	4	aging	0.291166	Q02750	Dual specificity mitogen-activated protein kinase kinase 1	0.054	Down	0.033299	MAP2K1	5.1	43.439	8.485	4	3	3	0	0	1	2	1	0	1	2	2	3	3	2	1	2	2	3	3	2	593720000	145040000	660540000	69996000	34750000	26518000	2.483	0.562	7.461	0.275	0.121	0.17
Biological Process	GO:0007568	4	aging	0.291166	P06396	Gelsolin	0.08	Down	0.044536	GSN	33.6	85.696	256.43	35	20	8	12	7	11	3	1	1	19	16	18	15	14	15	7	5	7	4	2	4	49607000	15273000	50188000	2030000	3091500	7460400	2.489	0.709	6.798	0.095	0.129	0.574
Biological Process	GO:0007568	4	aging	0.291166	P09471	Guanine nucleotide-binding protein G(o) subunit alpha	0.636	Down	0.028482	GNAO1	28.2	40.05	57.076	56	9	7	11	12	10	9	6	8	8	8	8	9	7	8	6	6	6	7	5	6	38301000	53226000	14813000	31102000	25706000	19880000	1.34	1.723	1.401	1.025	0.747	1.067
Biological Process	GO:0036294	6	cellular response to decreased oxygen levels	0.158399	P55786	Puromycin-sensitive aminopeptidase	0.646	Down	0.0047385	NPEPPS	23.6	103.28	87.105	74	20	20	16	18	11	11	10	8	19	19	15	17	18	15	19	19	15	17	18	15	21471000	21638000	8537000	15473000	14640000	9777900	1.502	1.4	1.614	1.019	0.851	1.049
Biological Process	GO:0036294	6	cellular response to decreased oxygen levels	0.158399	Q15008	26S proteasome non-ATPase regulatory subunit 6	0.606	Down	0.0119007	PSMD6	12.1	45.531	27.239	19	4	4	2	6	2	2	4	3	4	4	4	4	4	3	4	4	4	4	4	3	4391200	6771400	1781900	3371600	3502000	2140300	1.281	1.826	1.403	0.926	0.848	0.957
Biological Process	GO:0036294	6	cellular response to decreased oxygen levels	0.158399	P28070	Proteasome subunit beta type-4	0.448	Down	0.02462	PSMB4	31.1	29.204	27.088	19	6	6	5	4	1	5	3	1	4	5	3	4	6	3	4	5	3	4	6	3	39270000	57148000	29814000	25419000	34915000	15876000	1.242	1.672	2.548	0.757	0.918	0.771
Biological Process	GO:0036294	6	cellular response to decreased oxygen levels	0.158399	P28072	Proteasome subunit beta type-6	0.512	Down	0.0156837	PSMB6	13	25.357	8.82	10	3	3	3	2	2	1	1	1	3	2	2	2	2	2	3	2	2	2	2	2	34720000	52874000	20617000	27921000	24247000	16250000	1.258	1.773	2.017	0.953	0.73	0.903
Biological Process	GO:0043588	7	skin development	0.140009	Q02750	Dual specificity mitogen-activated protein kinase kinase 1	0.054	Down	0.033299	MAP2K1	5.1	43.439	8.485	4	3	3	0	0	1	2	1	0	1	2	2	3	3	2	1	2	2	3	3	2	593720000	145040000	660540000	69996000	34750000	26518000	2.483	0.562	7.461	0.275	0.121	0.17
Biological Process	GO:0043588	7	skin development	0.140009	P31947	14-3-3 protein sigma	0.409	Down	0.0101	SFN	37.1	27.774	127.26	38	9	6	12	8	8	4	4	2	7	8	9	5	7	4	6	5	6	4	4	2	228810000	234060000	120350000	134190000	134760000	50257000	1.623	1.536	2.305	0.896	0.794	0.547
Biological Process	GO:0043588	7	skin development	0.140009	O75369	Filamin-B	0.17	Down	0.031543	FLNB	48	278.16	323.31	394	95	84	137	67	76	30	57	27	93	67	74	46	66	42	83	58	65	38	57	34	146720000	33897000	30485000	9872100	25121000	9145800	3.681	0.787	2.066	0.233	0.524	0.352
Biological Process	GO:0044819	11	mitotic G1/S transition checkpoint	0.0441237	P31947	14-3-3 protein sigma	0.409	Down	0.0101	SFN	37.1	27.774	127.26	38	9	6	12	8	8	4	4	2	7	8	9	5	7	4	6	5	6	4	4	2	228810000	234060000	120350000	134190000	134760000	50257000	1.623	1.536	2.305	0.896	0.794	0.547
Biological Process	GO:0044819	11	mitotic G1/S transition checkpoint	0.0441237	Q71UM5	40S ribosomal protein S27-like	0.504	Down	0.011282	RPS27L	22.6	9.4771	3.0926	6	2	2	2	1	1	1	1	0	2	1	1	2	2	1	2	1	1	2	2	1	19902000	14524000	6724600	7879900	12400000	5365600	1.908	1.288	1.741	0.712	0.988	0.789
Biological Process	GO:0032101	5	regulation of response to external stimulus	0.104535	P21980	Protein-glutamine gamma-glutamyltransferase 2	0.192	Down	0.041101	TGM2	24.2	77.328	99.757	41	14	14	10	8	8	0	10	5	13	11	10	5	11	5	13	11	10	5	11	5	68821000	19811000	12885000	4293100	18177000	2770700	3.477	0.926	1.758	0.204	0.762	0.214
Biological Process	GO:0032101	5	regulation of response to external stimulus	0.104535	P27361	Mitogen-activated protein kinase 3	0.15	Down	0.00097886	MAPK3	18.5	43.135	10.767	8	6	4	4	2	1	0	0	1	6	6	4	3	3	2	4	4	2	1	1	1	4404100	3320400	1138100	783840	489290	288570	2.705	1.886	1.888	0.453	0.25	0.272
Biological Process	GO:0032101	5	regulation of response to external stimulus	0.104535	Q02750	Dual specificity mitogen-activated protein kinase kinase 1	0.054	Down	0.033299	MAP2K1	5.1	43.439	8.485	4	3	3	0	0	1	2	1	0	1	2	2	3	3	2	1	2	2	3	3	2	593720000	145040000	660540000	69996000	34750000	26518000	2.483	0.562	7.461	0.275	0.121	0.17
Biological Process	GO:0032101	5	regulation of response to external stimulus	0.104535	P0C0L5	Complement C4-B	0.056	Down	0.00093612	C4B	5.8	192.75	29.031	4	10	2	2	1	0	0	1	0	9	7	9	8	9	9	1	1	1	1	1	1	1729100	1709300	824490	177700	66202	57463	2.426	2.218	3.124	0.235	0.077	0.124
Biological Process	GO:0032101	5	regulation of response to external stimulus	0.104535	P07355	Annexin A2	0.279	Down	0.0059359	ANXA2	62.8	38.604	323.31	168	18	18	43	25	27	26	27	20	18	14	16	15	16	16	18	14	16	15	16	16	887470000	518070000	335260000	243040000	203670000	153130000	2.428	1.311	2.476	0.626	0.463	0.643
Biological Process	GO:0032101	5	regulation of response to external stimulus	0.104535	P49354	Protein farnesyltransferase/geranylgeranyltransferase type-1 subunit alpha	0.454	Down	0.01898	FNTA	11.6	44.408	5.7841	7	4	4	1	3	0	2	1	0	3	4	0	2	2	1	3	4	0	2	2	1	2070000	2543700	0	1283700	934310	669820	1.473	1.673		0.86	0.552	0.73
Biological Process	GO:0032101	5	regulation of response to external stimulus	0.104535	P28070	Proteasome subunit beta type-4	0.448	Down	0.02462	PSMB4	31.1	29.204	27.088	19	6	6	5	4	1	5	3	1	4	5	3	4	6	3	4	5	3	4	6	3	39270000	57148000	29814000	25419000	34915000	15876000	1.242	1.672	2.548	0.757	0.918	0.771
Biological Process	GO:1902749	8	regulation of cell cycle G2/M phase transition	0.238198	Q15008	26S proteasome non-ATPase regulatory subunit 6	0.606	Down	0.0119007	PSMD6	12.1	45.531	27.239	19	4	4	2	6	2	2	4	3	4	4	4	4	4	3	4	4	4	4	4	3	4391200	6771400	1781900	3371600	3502000	2140300	1.281	1.826	1.403	0.926	0.848	0.957
Biological Process	GO:1902749	8	regulation of cell cycle G2/M phase transition	0.238198	P28070	Proteasome subunit beta type-4	0.448	Down	0.02462	PSMB4	31.1	29.204	27.088	19	6	6	5	4	1	5	3	1	4	5	3	4	6	3	4	5	3	4	6	3	39270000	57148000	29814000	25419000	34915000	15876000	1.242	1.672	2.548	0.757	0.918	0.771
Biological Process	GO:1902749	8	regulation of cell cycle G2/M phase transition	0.238198	P28072	Proteasome subunit beta type-6	0.512	Down	0.0156837	PSMB6	13	25.357	8.82	10	3	3	3	2	2	1	1	1	3	2	2	2	2	2	3	2	2	2	2	2	34720000	52874000	20617000	27921000	24247000	16250000	1.258	1.773	2.017	0.953	0.73	0.903
Biological Process	GO:0050727	7	regulation of inflammatory response	0.177543	P21980	Protein-glutamine gamma-glutamyltransferase 2	0.192	Down	0.041101	TGM2	24.2	77.328	99.757	41	14	14	10	8	8	0	10	5	13	11	10	5	11	5	13	11	10	5	11	5	68821000	19811000	12885000	4293100	18177000	2770700	3.477	0.926	1.758	0.204	0.762	0.214
Biological Process	GO:0050727	7	regulation of inflammatory response	0.177543	P0C0L5	Complement C4-B	0.056	Down	0.00093612	C4B	5.8	192.75	29.031	4	10	2	2	1	0	0	1	0	9	7	9	8	9	9	1	1	1	1	1	1	1729100	1709300	824490	177700	66202	57463	2.426	2.218	3.124	0.235	0.077	0.124
Biological Process	GO:0050727	7	regulation of inflammatory response	0.177543	P28070	Proteasome subunit beta type-4	0.448	Down	0.02462	PSMB4	31.1	29.204	27.088	19	6	6	5	4	1	5	3	1	4	5	3	4	6	3	4	5	3	4	6	3	39270000	57148000	29814000	25419000	34915000	15876000	1.242	1.672	2.548	0.757	0.918	0.771
Biological Process	GO:1902750	9	negative regulation of cell cycle G2/M phase transition	0.217524	Q15008	26S proteasome non-ATPase regulatory subunit 6	0.606	Down	0.0119007	PSMD6	12.1	45.531	27.239	19	4	4	2	6	2	2	4	3	4	4	4	4	4	3	4	4	4	4	4	3	4391200	6771400	1781900	3371600	3502000	2140300	1.281	1.826	1.403	0.926	0.848	0.957
Biological Process	GO:1902750	9	negative regulation of cell cycle G2/M phase transition	0.217524	P28070	Proteasome subunit beta type-4	0.448	Down	0.02462	PSMB4	31.1	29.204	27.088	19	6	6	5	4	1	5	3	1	4	5	3	4	6	3	4	5	3	4	6	3	39270000	57148000	29814000	25419000	34915000	15876000	1.242	1.672	2.548	0.757	0.918	0.771
Biological Process	GO:1902750	9	negative regulation of cell cycle G2/M phase transition	0.217524	P28072	Proteasome subunit beta type-6	0.512	Down	0.0156837	PSMB6	13	25.357	8.82	10	3	3	3	2	2	1	1	1	3	2	2	2	2	2	3	2	2	2	2	2	34720000	52874000	20617000	27921000	24247000	16250000	1.258	1.773	2.017	0.953	0.73	0.903
Biological Process	GO:0016064	7	immunoglobulin mediated immune response	0.086628	P10909	Clusterin	0.183	Down	0.027979	CLU	27.6	52.494	323.31	70	10	10	15	16	18	4	9	8	10	10	10	8	10	9	10	10	10	8	10	9	237020000	262030000	253660000	33505000	102090000	62773000	1.596	1.632	4.611	0.212	0.571	0.648
Biological Process	GO:0016064	7	immunoglobulin mediated immune response	0.086628	P0C0L5	Complement C4-B	0.056	Down	0.00093612	C4B	5.8	192.75	29.031	4	10	2	2	1	0	0	1	0	9	7	9	8	9	9	1	1	1	1	1	1	1729100	1709300	824490	177700	66202	57463	2.426	2.218	3.124	0.235	0.077	0.124
Biological Process	GO:2001020	7	regulation of response to DNA damage stimulus	0.192214	P10909	Clusterin	0.183	Down	0.027979	CLU	27.6	52.494	323.31	70	10	10	15	16	18	4	9	8	10	10	10	8	10	9	10	10	10	8	10	9	237020000	262030000	253660000	33505000	102090000	62773000	1.596	1.632	4.611	0.212	0.571	0.648
Biological Process	GO:2001020	7	regulation of response to DNA damage stimulus	0.192214	Q99502	Eyes absent homolog 1	0.666	Down	0.0189799	EYA1	2.4	64.593	1.9129	3	1	1	2	0	1	0	0	0	1	1	1	1	1	0	1	1	1	1	1	0	30608000	38388000	10608000	23193000	24338000	0	1.285	1.491	1.202	0.917	0.848
Biological Process	GO:0071496	4	cellular response to external stimulus	0.365125	P27361	Mitogen-activated protein kinase 3	0.15	Down	0.00097886	MAPK3	18.5	43.135	10.767	8	6	4	4	2	1	0	0	1	6	6	4	3	3	2	4	4	2	1	1	1	4404100	3320400	1138100	783840	489290	288570	2.705	1.886	1.888	0.453	0.25	0.272
Biological Process	GO:0071496	4	cellular response to external stimulus	0.365125	Q9HD42	Charged multivesicular body protein 1a	0.449	Down	0.035704	CHMP1A	8.7	21.703	2.4011	2	2	2	1	1	0	0	0	0	2	1	0	1	0	1	2	1	0	1	0	1	1763200	1465100	0	683640	0	493620	1.709	1.313		0.624		0.733
Biological Process	GO:0002250	4	adaptive immune response	0.293357	P10909	Clusterin	0.183	Down	0.027979	CLU	27.6	52.494	323.31	70	10	10	15	16	18	4	9	8	10	10	10	8	10	9	10	10	10	8	10	9	237020000	262030000	253660000	33505000	102090000	62773000	1.596	1.632	4.611	0.212	0.571	0.648
Biological Process	GO:0002250	4	adaptive immune response	0.293357	P0C0L5	Complement C4-B	0.056	Down	0.00093612	C4B	5.8	192.75	29.031	4	10	2	2	1	0	0	1	0	9	7	9	8	9	9	1	1	1	1	1	1	1729100	1709300	824490	177700	66202	57463	2.426	2.218	3.124	0.235	0.077	0.124
Biological Process	GO:0000075	7	cell cycle checkpoint	0.206459	P31947	14-3-3 protein sigma	0.409	Down	0.0101	SFN	37.1	27.774	127.26	38	9	6	12	8	8	4	4	2	7	8	9	5	7	4	6	5	6	4	4	2	228810000	234060000	120350000	134190000	134760000	50257000	1.623	1.536	2.305	0.896	0.794	0.547
Biological Process	GO:0000075	7	cell cycle checkpoint	0.206459	Q71UM5	40S ribosomal protein S27-like	0.504	Down	0.011282	RPS27L	22.6	9.4771	3.0926	6	2	2	2	1	1	1	1	0	2	1	1	2	2	1	2	1	1	2	2	1	19902000	14524000	6724600	7879900	12400000	5365600	1.908	1.288	1.741	0.712	0.988	0.789
Biological Process	GO:0030216	8	keratinocyte differentiation	0.0294137	Q02750	Dual specificity mitogen-activated protein kinase kinase 1	0.054	Down	0.033299	MAP2K1	5.1	43.439	8.485	4	3	3	0	0	1	2	1	0	1	2	2	3	3	2	1	2	2	3	3	2	593720000	145040000	660540000	69996000	34750000	26518000	2.483	0.562	7.461	0.275	0.121	0.17
Biological Process	GO:0030216	8	keratinocyte differentiation	0.0294137	P31947	14-3-3 protein sigma	0.409	Down	0.0101	SFN	37.1	27.774	127.26	38	9	6	12	8	8	4	4	2	7	8	9	5	7	4	6	5	6	4	4	2	228810000	234060000	120350000	134190000	134760000	50257000	1.623	1.536	2.305	0.896	0.794	0.547
Biological Process	GO:0030216	8	keratinocyte differentiation	0.0294137	O75369	Filamin-B	0.17	Down	0.031543	FLNB	48	278.16	323.31	394	95	84	137	67	76	30	57	27	93	67	74	46	66	42	83	58	65	38	57	34	146720000	33897000	30485000	9872100	25121000	9145800	3.681	0.787	2.066	0.233	0.524	0.352
Biological Process	GO:0045089	8	positive regulation of innate immune response	0.246923	P02790	Hemopexin	0.363	Down	0.046037	HPX	2.8	51.676	12.412	7	1	1	1	2	1	1	1	1	1	1	1	1	1	1	1	1	1	1	1	1	13348000	16477000	12047000	7938200	6012200	6343600	1.375	1.57	3.352	0.77	0.514	1.002
Biological Process	GO:0045089	8	positive regulation of innate immune response	0.246923	Q15008	26S proteasome non-ATPase regulatory subunit 6	0.606	Down	0.0119007	PSMD6	12.1	45.531	27.239	19	4	4	2	6	2	2	4	3	4	4	4	4	4	3	4	4	4	4	4	3	4391200	6771400	1781900	3371600	3502000	2140300	1.281	1.826	1.403	0.926	0.848	0.957
Biological Process	GO:0045089	8	positive regulation of innate immune response	0.246923	P28070	Proteasome subunit beta type-4	0.448	Down	0.02462	PSMB4	31.1	29.204	27.088	19	6	6	5	4	1	5	3	1	4	5	3	4	6	3	4	5	3	4	6	3	39270000	57148000	29814000	25419000	34915000	15876000	1.242	1.672	2.548	0.757	0.918	0.771
Biological Process	GO:0045089	8	positive regulation of innate immune response	0.246923	P28072	Proteasome subunit beta type-6	0.512	Down	0.0156837	PSMB6	13	25.357	8.82	10	3	3	3	2	2	1	1	1	3	2	2	2	2	2	3	2	2	2	2	2	34720000	52874000	20617000	27921000	24247000	16250000	1.258	1.773	2.017	0.953	0.73	0.903
Biological Process	GO:0045927	5	positive regulation of growth	0.1679	P15311	Ezrin	0.48	Down	0.04462	EZR	28.2	69.412	100.17	39	16	7	10	6	10	6	4	3	15	15	14	12	14	11	6	6	6	4	5	4	58827000	57090000	37494000	46846000	33357000	19834000	1.487	1.335	2.559	1.115	0.7	0.769
Biological Process	GO:0045927	5	positive regulation of growth	0.1679	Q13765	Nascent polypeptide-associated complex subunit alpha	0.64	Down	0.0161794	NACA	19.5	23.384	62.673	18	3	3	3	4	2	3	4	2	3	3	3	3	3	3	3	3	3	3	3	3	42791000	33209000	15152000	26652000	27390000	16509000	1.695	1.216	1.62	0.994	0.901	1.003
Biological Process	GO:0045927	5	positive regulation of growth	0.1679	P31947	14-3-3 protein sigma	0.409	Down	0.0101	SFN	37.1	27.774	127.26	38	9	6	12	8	8	4	4	2	7	8	9	5	7	4	6	5	6	4	4	2	228810000	234060000	120350000	134190000	134760000	50257000	1.623	1.536	2.305	0.896	0.794	0.547
Biological Process	GO:0070482	4	response to oxygen levels	0.12343	Q8WVM8	Sec1 family domain-containing protein 1	0.595	Down	0.0143556	SCFD1	9.8	72.379	13.163	16	4	4	4	4	1	3	3	1	4	4	3	3	2	3	4	4	3	3	2	3	1076500	1301600	358700	580110	716860	514700	1.515	1.695	1.363	0.769	0.839	1.111
Biological Process	GO:0070482	4	response to oxygen levels	0.12343	P55786	Puromycin-sensitive aminopeptidase	0.646	Down	0.0047385	NPEPPS	23.6	103.28	87.105	74	20	20	16	18	11	11	10	8	19	19	15	17	18	15	19	19	15	17	18	15	21471000	21638000	8537000	15473000	14640000	9777900	1.502	1.4	1.614	1.019	0.851	1.049
Biological Process	GO:0070482	4	response to oxygen levels	0.12343	Q15008	26S proteasome non-ATPase regulatory subunit 6	0.606	Down	0.0119007	PSMD6	12.1	45.531	27.239	19	4	4	2	6	2	2	4	3	4	4	4	4	4	3	4	4	4	4	4	3	4391200	6771400	1781900	3371600	3502000	2140300	1.281	1.826	1.403	0.926	0.848	0.957
Biological Process	GO:0070482	4	response to oxygen levels	0.12343	P28070	Proteasome subunit beta type-4	0.448	Down	0.02462	PSMB4	31.1	29.204	27.088	19	6	6	5	4	1	5	3	1	4	5	3	4	6	3	4	5	3	4	6	3	39270000	57148000	29814000	25419000	34915000	15876000	1.242	1.672	2.548	0.757	0.918	0.771
Biological Process	GO:0070482	4	response to oxygen levels	0.12343	P28072	Proteasome subunit beta type-6	0.512	Down	0.0156837	PSMB6	13	25.357	8.82	10	3	3	3	2	2	1	1	1	3	2	2	2	2	2	3	2	2	2	2	2	34720000	52874000	20617000	27921000	24247000	16250000	1.258	1.773	2.017	0.953	0.73	0.903
Biological Process	GO:0070482	4	response to oxygen levels	0.12343	O00151	PDZ and LIM domain protein 1	0.089	Down	0.0190201	PDLIM1	34.7	36.071	31.323	14	9	9	8	3	1	1	1	0	8	6	5	4	3	1	8	6	5	4	3	1	34744000	13154000	3914100	2638100	2621700	301240	3.877	1.358	1.179	0.277	0.243	0.052
Biological Process	GO:1903522	6	regulation of blood circulation	0.293357	P30626	Sorcin	0.595	Down	0.03778	SRI	19.2	21.676	5.1204	6	4	4	1	2	1	1	0	1	2	2	3	3	2	2	2	2	3	3	2	2	5839500	4973700	2891400	3483400	4286600	2614300	1.552	1.223	2.075	0.872	0.947	1.065
Biological Process	GO:1903522	6	regulation of blood circulation	0.293357	P09471	Guanine nucleotide-binding protein G(o) subunit alpha	0.636	Down	0.028482	GNAO1	28.2	40.05	57.076	56	9	7	11	12	10	9	6	8	8	8	8	9	7	8	6	6	6	7	5	6	38301000	53226000	14813000	31102000	25706000	19880000	1.34	1.723	1.401	1.025	0.747	1.067
Biological Process	GO:0031349	7	positive regulation of defense response	0.06839	P21980	Protein-glutamine gamma-glutamyltransferase 2	0.192	Down	0.041101	TGM2	24.2	77.328	99.757	41	14	14	10	8	8	0	10	5	13	11	10	5	11	5	13	11	10	5	11	5	68821000	19811000	12885000	4293100	18177000	2770700	3.477	0.926	1.758	0.204	0.762	0.214
Biological Process	GO:0031349	7	positive regulation of defense response	0.06839	P27361	Mitogen-activated protein kinase 3	0.15	Down	0.00097886	MAPK3	18.5	43.135	10.767	8	6	4	4	2	1	0	0	1	6	6	4	3	3	2	4	4	2	1	1	1	4404100	3320400	1138100	783840	489290	288570	2.705	1.886	1.888	0.453	0.25	0.272
Biological Process	GO:0031349	7	positive regulation of defense response	0.06839	P02790	Hemopexin	0.363	Down	0.046037	HPX	2.8	51.676	12.412	7	1	1	1	2	1	1	1	1	1	1	1	1	1	1	1	1	1	1	1	1	13348000	16477000	12047000	7938200	6012200	6343600	1.375	1.57	3.352	0.77	0.514	1.002
Biological Process	GO:0031349	7	positive regulation of defense response	0.06839	Q15008	26S proteasome non-ATPase regulatory subunit 6	0.606	Down	0.0119007	PSMD6	12.1	45.531	27.239	19	4	4	2	6	2	2	4	3	4	4	4	4	4	3	4	4	4	4	4	3	4391200	6771400	1781900	3371600	3502000	2140300	1.281	1.826	1.403	0.926	0.848	0.957
Biological Process	GO:0031349	7	positive regulation of defense response	0.06839	P28070	Proteasome subunit beta type-4	0.448	Down	0.02462	PSMB4	31.1	29.204	27.088	19	6	6	5	4	1	5	3	1	4	5	3	4	6	3	4	5	3	4	6	3	39270000	57148000	29814000	25419000	34915000	15876000	1.242	1.672	2.548	0.757	0.918	0.771
Biological Process	GO:0031349	7	positive regulation of defense response	0.06839	P28072	Proteasome subunit beta type-6	0.512	Down	0.0156837	PSMB6	13	25.357	8.82	10	3	3	3	2	2	1	1	1	3	2	2	2	2	2	3	2	2	2	2	2	34720000	52874000	20617000	27921000	24247000	16250000	1.258	1.773	2.017	0.953	0.73	0.903
Biological Process	GO:0036293	5	response to decreased oxygen levels	0.12343	Q8WVM8	Sec1 family domain-containing protein 1	0.595	Down	0.0143556	SCFD1	9.8	72.379	13.163	16	4	4	4	4	1	3	3	1	4	4	3	3	2	3	4	4	3	3	2	3	1076500	1301600	358700	580110	716860	514700	1.515	1.695	1.363	0.769	0.839	1.111
Biological Process	GO:0036293	5	response to decreased oxygen levels	0.12343	P55786	Puromycin-sensitive aminopeptidase	0.646	Down	0.0047385	NPEPPS	23.6	103.28	87.105	74	20	20	16	18	11	11	10	8	19	19	15	17	18	15	19	19	15	17	18	15	21471000	21638000	8537000	15473000	14640000	9777900	1.502	1.4	1.614	1.019	0.851	1.049
Biological Process	GO:0036293	5	response to decreased oxygen levels	0.12343	Q15008	26S proteasome non-ATPase regulatory subunit 6	0.606	Down	0.0119007	PSMD6	12.1	45.531	27.239	19	4	4	2	6	2	2	4	3	4	4	4	4	4	3	4	4	4	4	4	3	4391200	6771400	1781900	3371600	3502000	2140300	1.281	1.826	1.403	0.926	0.848	0.957
Biological Process	GO:0036293	5	response to decreased oxygen levels	0.12343	P28070	Proteasome subunit beta type-4	0.448	Down	0.02462	PSMB4	31.1	29.204	27.088	19	6	6	5	4	1	5	3	1	4	5	3	4	6	3	4	5	3	4	6	3	39270000	57148000	29814000	25419000	34915000	15876000	1.242	1.672	2.548	0.757	0.918	0.771
Biological Process	GO:0036293	5	response to decreased oxygen levels	0.12343	P28072	Proteasome subunit beta type-6	0.512	Down	0.0156837	PSMB6	13	25.357	8.82	10	3	3	3	2	2	1	1	1	3	2	2	2	2	2	3	2	2	2	2	2	34720000	52874000	20617000	27921000	24247000	16250000	1.258	1.773	2.017	0.953	0.73	0.903
Biological Process	GO:0036293	5	response to decreased oxygen levels	0.12343	O00151	PDZ and LIM domain protein 1	0.089	Down	0.0190201	PDLIM1	34.7	36.071	31.323	14	9	9	8	3	1	1	1	0	8	6	5	4	3	1	8	6	5	4	3	1	34744000	13154000	3914100	2638100	2621700	301240	3.877	1.358	1.179	0.277	0.243	0.052
Biological Process	GO:0044774	9	mitotic DNA integrity checkpoint	0.0441237	P31947	14-3-3 protein sigma	0.409	Down	0.0101	SFN	37.1	27.774	127.26	38	9	6	12	8	8	4	4	2	7	8	9	5	7	4	6	5	6	4	4	2	228810000	234060000	120350000	134190000	134760000	50257000	1.623	1.536	2.305	0.896	0.794	0.547
Biological Process	GO:0044774	9	mitotic DNA integrity checkpoint	0.0441237	Q71UM5	40S ribosomal protein S27-like	0.504	Down	0.011282	RPS27L	22.6	9.4771	3.0926	6	2	2	2	1	1	1	1	0	2	1	1	2	2	1	2	1	1	2	2	1	19902000	14524000	6724600	7879900	12400000	5365600	1.908	1.288	1.741	0.712	0.988	0.789
Biological Process	GO:0010564	6	regulation of cell cycle process	0.171393	Q15008	26S proteasome non-ATPase regulatory subunit 6	0.606	Down	0.0119007	PSMD6	12.1	45.531	27.239	19	4	4	2	6	2	2	4	3	4	4	4	4	4	3	4	4	4	4	4	3	4391200	6771400	1781900	3371600	3502000	2140300	1.281	1.826	1.403	0.926	0.848	0.957
Biological Process	GO:0010564	6	regulation of cell cycle process	0.171393	P31947	14-3-3 protein sigma	0.409	Down	0.0101	SFN	37.1	27.774	127.26	38	9	6	12	8	8	4	4	2	7	8	9	5	7	4	6	5	6	4	4	2	228810000	234060000	120350000	134190000	134760000	50257000	1.623	1.536	2.305	0.896	0.794	0.547
Biological Process	GO:0010564	6	regulation of cell cycle process	0.171393	Q71UM5	40S ribosomal protein S27-like	0.504	Down	0.011282	RPS27L	22.6	9.4771	3.0926	6	2	2	2	1	1	1	1	0	2	1	1	2	2	1	2	1	1	2	2	1	19902000	14524000	6724600	7879900	12400000	5365600	1.908	1.288	1.741	0.712	0.988	0.789
Biological Process	GO:0010564	6	regulation of cell cycle process	0.171393	P28070	Proteasome subunit beta type-4	0.448	Down	0.02462	PSMB4	31.1	29.204	27.088	19	6	6	5	4	1	5	3	1	4	5	3	4	6	3	4	5	3	4	6	3	39270000	57148000	29814000	25419000	34915000	15876000	1.242	1.672	2.548	0.757	0.918	0.771
Biological Process	GO:0010564	6	regulation of cell cycle process	0.171393	P28072	Proteasome subunit beta type-6	0.512	Down	0.0156837	PSMB6	13	25.357	8.82	10	3	3	3	2	2	1	1	1	3	2	2	2	2	2	3	2	2	2	2	2	34720000	52874000	20617000	27921000	24247000	16250000	1.258	1.773	2.017	0.953	0.73	0.903
Biological Process	GO:0010564	6	regulation of cell cycle process	0.171393	Q9HD42	Charged multivesicular body protein 1a	0.449	Down	0.035704	CHMP1A	8.7	21.703	2.4011	2	2	2	1	1	0	0	0	0	2	1	0	1	0	1	2	1	0	1	0	1	1763200	1465100	0	683640	0	493620	1.709	1.313		0.624		0.733
Biological Process	GO:0009913	7	epidermal cell differentiation	0.0556945	Q02750	Dual specificity mitogen-activated protein kinase kinase 1	0.054	Down	0.033299	MAP2K1	5.1	43.439	8.485	4	3	3	0	0	1	2	1	0	1	2	2	3	3	2	1	2	2	3	3	2	593720000	145040000	660540000	69996000	34750000	26518000	2.483	0.562	7.461	0.275	0.121	0.17
Biological Process	GO:0009913	7	epidermal cell differentiation	0.0556945	P31947	14-3-3 protein sigma	0.409	Down	0.0101	SFN	37.1	27.774	127.26	38	9	6	12	8	8	4	4	2	7	8	9	5	7	4	6	5	6	4	4	2	228810000	234060000	120350000	134190000	134760000	50257000	1.623	1.536	2.305	0.896	0.794	0.547
Biological Process	GO:0009913	7	epidermal cell differentiation	0.0556945	O75369	Filamin-B	0.17	Down	0.031543	FLNB	48	278.16	323.31	394	95	84	137	67	76	30	57	27	93	67	74	46	66	42	83	58	65	38	57	34	146720000	33897000	30485000	9872100	25121000	9145800	3.681	0.787	2.066	0.233	0.524	0.352
Biological Process	GO:0008544	5	epidermis development	0.00404811	Q02750	Dual specificity mitogen-activated protein kinase kinase 1	0.054	Down	0.033299	MAP2K1	5.1	43.439	8.485	4	3	3	0	0	1	2	1	0	1	2	2	3	3	2	1	2	2	3	3	2	593720000	145040000	660540000	69996000	34750000	26518000	2.483	0.562	7.461	0.275	0.121	0.17
Biological Process	GO:0008544	5	epidermis development	0.00404811	Q13751	Laminin subunit beta-3	0.003	Down	0.0031013	LAMB3	36.7	129.57	323.31	150	37	37	63	29	58	0	0	0	37	27	36	3	2	2	37	27	36	3	2	2	272670000	51820000	152920000	1931400	229890	229960	3.639	0.64	5.51	0.024	0.003	0.005
Biological Process	GO:0008544	5	epidermis development	0.00404811	P31947	14-3-3 protein sigma	0.409	Down	0.0101	SFN	37.1	27.774	127.26	38	9	6	12	8	8	4	4	2	7	8	9	5	7	4	6	5	6	4	4	2	228810000	234060000	120350000	134190000	134760000	50257000	1.623	1.536	2.305	0.896	0.794	0.547
Biological Process	GO:0008544	5	epidermis development	0.00404811	O75369	Filamin-B	0.17	Down	0.031543	FLNB	48	278.16	323.31	394	95	84	137	67	76	30	57	27	93	67	74	46	66	42	83	58	65	38	57	34	146720000	33897000	30485000	9872100	25121000	9145800	3.681	0.787	2.066	0.233	0.524	0.352
Biological Process	GO:0008544	5	epidermis development	0.00404811	Q16787	Laminin subunit alpha-3	0.001	Down	0.0009187	LAMA3	20.8	366.65	323.31	185	61	60	71	40	73	1	0	0	57	51	60	2	1	1	56	51	59	2	1	1	125750000	35488000	91138000	36269	180890	132970	3.186	0.832	6.236	0.001	0.004	0.005
Biological Process	GO:0008544	5	epidermis development	0.00404811	Q13753	Laminin subunit gamma-2	0.003	Down	0.00140404	LAMC2	42.2	130.97	323.31	158	41	41	72	25	59	2	0	0	40	31	37	5	3	1	40	31	37	5	3	1	317670000	60802000	196920000	549290	779020	764800	3.523	0.624	5.896	0.006	0.007	0.013
Biological Process	GO:0006974	5	cellular response to DNA damage stimulus	0.075687	P27361	Mitogen-activated protein kinase 3	0.15	Down	0.00097886	MAPK3	18.5	43.135	10.767	8	6	4	4	2	1	0	0	1	6	6	4	3	3	2	4	4	2	1	1	1	4404100	3320400	1138100	783840	489290	288570	2.705	1.886	1.888	0.453	0.25	0.272
Biological Process	GO:0006974	5	cellular response to DNA damage stimulus	0.075687	Q92905	COP9 signalosome complex subunit 5	0.499	Down	0.020183	COPS5	12	37.578	5.672	9	4	4	1	4	0	2	1	1	3	3	2	4	3	2	3	3	2	4	3	2	2195000	3770200	859870	1556000	1779100	687540	1.296	2.058	1.372	0.865	0.872	0.622
Biological Process	GO:0006974	5	cellular response to DNA damage stimulus	0.075687	P54727	UV excision repair protein RAD23 homolog B	0.374	Down	0.024544	RAD23B	18.3	43.171	12.837	28	8	5	5	6	5	5	4	3	8	8	8	8	7	6	5	5	5	5	4	4	167980000	83640000	45618000	58486000	59529000	21743000	2.461	1.133	1.804	0.807	0.724	0.489
Biological Process	GO:0006974	5	cellular response to DNA damage stimulus	0.075687	P31947	14-3-3 protein sigma	0.409	Down	0.0101	SFN	37.1	27.774	127.26	38	9	6	12	8	8	4	4	2	7	8	9	5	7	4	6	5	6	4	4	2	228810000	234060000	120350000	134190000	134760000	50257000	1.623	1.536	2.305	0.896	0.794	0.547
Biological Process	GO:0006974	5	cellular response to DNA damage stimulus	0.075687	Q71UM5	40S ribosomal protein S27-like	0.504	Down	0.011282	RPS27L	22.6	9.4771	3.0926	6	2	2	2	1	1	1	1	0	2	1	1	2	2	1	2	1	1	2	2	1	19902000	14524000	6724600	7879900	12400000	5365600	1.908	1.288	1.741	0.712	0.988	0.789
Biological Process	GO:0006974	5	cellular response to DNA damage stimulus	0.075687	Q99502	Eyes absent homolog 1	0.666	Down	0.0189799	EYA1	2.4	64.593	1.9129	3	1	1	2	0	1	0	0	0	1	1	1	1	1	0	1	1	1	1	1	0	30608000	38388000	10608000	23193000	24338000	0	1.285	1.491	1.202	0.917	0.848
Biological Process	GO:1903034	6	regulation of response to wounding	0.0753821	Q02750	Dual specificity mitogen-activated protein kinase kinase 1	0.054	Down	0.033299	MAP2K1	5.1	43.439	8.485	4	3	3	0	0	1	2	1	0	1	2	2	3	3	2	1	2	2	3	3	2	593720000	145040000	660540000	69996000	34750000	26518000	2.483	0.562	7.461	0.275	0.121	0.17
Biological Process	GO:1903034	6	regulation of response to wounding	0.0753821	P06396	Gelsolin	0.08	Down	0.044536	GSN	33.6	85.696	256.43	35	20	8	12	7	11	3	1	1	19	16	18	15	14	15	7	5	7	4	2	4	49607000	15273000	50188000	2030000	3091500	7460400	2.489	0.709	6.798	0.095	0.129	0.574
Biological Process	GO:1903034	6	regulation of response to wounding	0.0753821	P07355	Annexin A2	0.279	Down	0.0059359	ANXA2	62.8	38.604	323.31	168	18	18	43	25	27	26	27	20	18	14	16	15	16	16	18	14	16	15	16	16	887470000	518070000	335260000	243040000	203670000	153130000	2.428	1.311	2.476	0.626	0.463	0.643
Biological Process	GO:0045930	7	negative regulation of mitotic cell cycle	0.0962805	Q15008	26S proteasome non-ATPase regulatory subunit 6	0.606	Down	0.0119007	PSMD6	12.1	45.531	27.239	19	4	4	2	6	2	2	4	3	4	4	4	4	4	3	4	4	4	4	4	3	4391200	6771400	1781900	3371600	3502000	2140300	1.281	1.826	1.403	0.926	0.848	0.957
Biological Process	GO:0045930	7	negative regulation of mitotic cell cycle	0.0962805	P31947	14-3-3 protein sigma	0.409	Down	0.0101	SFN	37.1	27.774	127.26	38	9	6	12	8	8	4	4	2	7	8	9	5	7	4	6	5	6	4	4	2	228810000	234060000	120350000	134190000	134760000	50257000	1.623	1.536	2.305	0.896	0.794	0.547
Biological Process	GO:0045930	7	negative regulation of mitotic cell cycle	0.0962805	Q71UM5	40S ribosomal protein S27-like	0.504	Down	0.011282	RPS27L	22.6	9.4771	3.0926	6	2	2	2	1	1	1	1	0	2	1	1	2	2	1	2	1	1	2	2	1	19902000	14524000	6724600	7879900	12400000	5365600	1.908	1.288	1.741	0.712	0.988	0.789
Biological Process	GO:0045930	7	negative regulation of mitotic cell cycle	0.0962805	P28070	Proteasome subunit beta type-4	0.448	Down	0.02462	PSMB4	31.1	29.204	27.088	19	6	6	5	4	1	5	3	1	4	5	3	4	6	3	4	5	3	4	6	3	39270000	57148000	29814000	25419000	34915000	15876000	1.242	1.672	2.548	0.757	0.918	0.771
Biological Process	GO:0045930	7	negative regulation of mitotic cell cycle	0.0962805	P28072	Proteasome subunit beta type-6	0.512	Down	0.0156837	PSMB6	13	25.357	8.82	10	3	3	3	2	2	1	1	1	3	2	2	2	2	2	3	2	2	2	2	2	34720000	52874000	20617000	27921000	24247000	16250000	1.258	1.773	2.017	0.953	0.73	0.903
Biological Process	GO:0006954	5	inflammatory response	0.143814	P00738	Haptoglobin	0.203	Down	0.022302	HP	12.3	45.205	11.888	29	6	6	3	4	7	4	7	4	6	5	6	5	5	5	6	5	6	5	5	5	156470000	134410000	151310000	32949000	62841000	36987000	1.743	1.385	4.55	0.346	0.582	0.632
Biological Process	GO:0006954	5	inflammatory response	0.143814	Q16853	Membrane primary amine oxidase	0.158	Down	0.043257	AOC3	2.2	84.621	4.0068	10	2	2	2	1	1	2	2	2	2	2	2	2	2	2	2	2	2	2	2	2	13486000	9648900	10559000	1004300	894470	4136600	2.174	1.438	4.597	0.153	0.12	1.023
Biological Process	GO:0006954	5	inflammatory response	0.143814	P0C0L5	Complement C4-B	0.056	Down	0.00093612	C4B	5.8	192.75	29.031	4	10	2	2	1	0	0	1	0	9	7	9	8	9	9	1	1	1	1	1	1	1729100	1709300	824490	177700	66202	57463	2.426	2.218	3.124	0.235	0.077	0.124
Biological Process	GO:0006954	5	inflammatory response	0.143814	Q9NPH3	Interleukin-1 receptor accessory protein	0.177	Down	0.0194826	IL1RAP	3.3	65.418	2.9095	5	2	2	2	2	1	0	0	0	2	2	2	1	1	2	2	2	2	1	1	2	1010300	1107200	1083100	258190	220380	295420	1.628	1.65	4.712	0.392	0.295	0.73
Biological Process	GO:0071453	5	cellular response to oxygen levels	0.158399	P55786	Puromycin-sensitive aminopeptidase	0.646	Down	0.0047385	NPEPPS	23.6	103.28	87.105	74	20	20	16	18	11	11	10	8	19	19	15	17	18	15	19	19	15	17	18	15	21471000	21638000	8537000	15473000	14640000	9777900	1.502	1.4	1.614	1.019	0.851	1.049
Biological Process	GO:0071453	5	cellular response to oxygen levels	0.158399	Q15008	26S proteasome non-ATPase regulatory subunit 6	0.606	Down	0.0119007	PSMD6	12.1	45.531	27.239	19	4	4	2	6	2	2	4	3	4	4	4	4	4	3	4	4	4	4	4	3	4391200	6771400	1781900	3371600	3502000	2140300	1.281	1.826	1.403	0.926	0.848	0.957
Biological Process	GO:0071453	5	cellular response to oxygen levels	0.158399	P28070	Proteasome subunit beta type-4	0.448	Down	0.02462	PSMB4	31.1	29.204	27.088	19	6	6	5	4	1	5	3	1	4	5	3	4	6	3	4	5	3	4	6	3	39270000	57148000	29814000	25419000	34915000	15876000	1.242	1.672	2.548	0.757	0.918	0.771
Biological Process	GO:0071453	5	cellular response to oxygen levels	0.158399	P28072	Proteasome subunit beta type-6	0.512	Down	0.0156837	PSMB6	13	25.357	8.82	10	3	3	3	2	2	1	1	1	3	2	2	2	2	2	3	2	2	2	2	2	34720000	52874000	20617000	27921000	24247000	16250000	1.258	1.773	2.017	0.953	0.73	0.903
Biological Process	GO:0031099	4	regeneration	0.197275	P12429	Annexin A3	0.015	Down	0.0033839	ANXA3	43	36.375	86.457	39	13	13	16	9	13	1	0	0	13	10	12	5	3	1	13	10	12	5	3	1	73099000	16182000	30260000	1403300	449940	542640	3.839	0.786	4.291	0.069	0.02	0.044
Biological Process	GO:0031099	4	regeneration	0.197275	P06396	Gelsolin	0.08	Down	0.044536	GSN	33.6	85.696	256.43	35	20	8	12	7	11	3	1	1	19	16	18	15	14	15	7	5	7	4	2	4	49607000	15273000	50188000	2030000	3091500	7460400	2.489	0.709	6.798	0.095	0.129	0.574
Biological Process	GO:0031099	4	regeneration	0.197275	Q13765	Nascent polypeptide-associated complex subunit alpha	0.64	Down	0.0161794	NACA	19.5	23.384	62.673	18	3	3	3	4	2	3	4	2	3	3	3	3	3	3	3	3	3	3	3	3	42791000	33209000	15152000	26652000	27390000	16509000	1.695	1.216	1.62	0.994	0.901	1.003
Biological Process	GO:0009617	6	response to bacterium	0.173517	P00738	Haptoglobin	0.203	Down	0.022302	HP	12.3	45.205	11.888	29	6	6	3	4	7	4	7	4	6	5	6	5	5	5	6	5	6	5	5	5	156470000	134410000	151310000	32949000	62841000	36987000	1.743	1.385	4.55	0.346	0.582	0.632
Biological Process	GO:0009617	6	response to bacterium	0.173517	P27361	Mitogen-activated protein kinase 3	0.15	Down	0.00097886	MAPK3	18.5	43.135	10.767	8	6	4	4	2	1	0	0	1	6	6	4	3	3	2	4	4	2	1	1	1	4404100	3320400	1138100	783840	489290	288570	2.705	1.886	1.888	0.453	0.25	0.272
Biological Process	GO:0009617	6	response to bacterium	0.173517	P12429	Annexin A3	0.015	Down	0.0033839	ANXA3	43	36.375	86.457	39	13	13	16	9	13	1	0	0	13	10	12	5	3	1	13	10	12	5	3	1	73099000	16182000	30260000	1403300	449940	542640	3.839	0.786	4.291	0.069	0.02	0.044
Biological Process	GO:0009617	6	response to bacterium	0.173517	P0C0L5	Complement C4-B	0.056	Down	0.00093612	C4B	5.8	192.75	29.031	4	10	2	2	1	0	0	1	0	9	7	9	8	9	9	1	1	1	1	1	1	1729100	1709300	824490	177700	66202	57463	2.426	2.218	3.124	0.235	0.077	0.124
Biological Process	GO:0048639	6	positive regulation of developmental growth	0.220817	P15311	Ezrin	0.48	Down	0.04462	EZR	28.2	69.412	100.17	39	16	7	10	6	10	6	4	3	15	15	14	12	14	11	6	6	6	4	5	4	58827000	57090000	37494000	46846000	33357000	19834000	1.487	1.335	2.559	1.115	0.7	0.769
Biological Process	GO:0048639	6	positive regulation of developmental growth	0.220817	Q13765	Nascent polypeptide-associated complex subunit alpha	0.64	Down	0.0161794	NACA	19.5	23.384	62.673	18	3	3	3	4	2	3	4	2	3	3	3	3	3	3	3	3	3	3	3	3	42791000	33209000	15152000	26652000	27390000	16509000	1.695	1.216	1.62	0.994	0.901	1.003
Biological Process	GO:0080135	6	regulation of cellular response to stress	0.11275	P27361	Mitogen-activated protein kinase 3	0.15	Down	0.00097886	MAPK3	18.5	43.135	10.767	8	6	4	4	2	1	0	0	1	6	6	4	3	3	2	4	4	2	1	1	1	4404100	3320400	1138100	783840	489290	288570	2.705	1.886	1.888	0.453	0.25	0.272
Biological Process	GO:0080135	6	regulation of cellular response to stress	0.11275	P30040	Endoplasmic reticulum resident protein 29	0.629	Down	0.021783	ERP29	19.2	28.993	34.677	45	5	5	6	11	8	7	8	5	5	5	5	5	5	5	5	5	5	5	5	5	37110000	56152000	15779000	32895000	33974000	15367000	1.242	1.738	1.427	1.037	0.945	0.789
Biological Process	GO:0080135	6	regulation of cellular response to stress	0.11275	P10909	Clusterin	0.183	Down	0.027979	CLU	27.6	52.494	323.31	70	10	10	15	16	18	4	9	8	10	10	10	8	10	9	10	10	10	8	10	9	237020000	262030000	253660000	33505000	102090000	62773000	1.596	1.632	4.611	0.212	0.571	0.648
Biological Process	GO:0080135	6	regulation of cellular response to stress	0.11275	Q02750	Dual specificity mitogen-activated protein kinase kinase 1	0.054	Down	0.033299	MAP2K1	5.1	43.439	8.485	4	3	3	0	0	1	2	1	0	1	2	2	3	3	2	1	2	2	3	3	2	593720000	145040000	660540000	69996000	34750000	26518000	2.483	0.562	7.461	0.275	0.121	0.17
Biological Process	GO:0080135	6	regulation of cellular response to stress	0.11275	P15311	Ezrin	0.48	Down	0.04462	EZR	28.2	69.412	100.17	39	16	7	10	6	10	6	4	3	15	15	14	12	14	11	6	6	6	4	5	4	58827000	57090000	37494000	46846000	33357000	19834000	1.487	1.335	2.559	1.115	0.7	0.769
Biological Process	GO:0080135	6	regulation of cellular response to stress	0.11275	Q92905	COP9 signalosome complex subunit 5	0.499	Down	0.020183	COPS5	12	37.578	5.672	9	4	4	1	4	0	2	1	1	3	3	2	4	3	2	3	3	2	4	3	2	2195000	3770200	859870	1556000	1779100	687540	1.296	2.058	1.372	0.865	0.872	0.622
Biological Process	GO:0080135	6	regulation of cellular response to stress	0.11275	Q99502	Eyes absent homolog 1	0.666	Down	0.0189799	EYA1	2.4	64.593	1.9129	3	1	1	2	0	1	0	0	0	1	1	1	1	1	0	1	1	1	1	1	0	30608000	38388000	10608000	23193000	24338000	0	1.285	1.491	1.202	0.917	0.848
Biological Process	GO:1903047	6	mitotic cell cycle process	0.129697	P68366	Tubulin alpha-4A chain	0.103	Down	0.0024179	TUBA4A	52.2	49.924	14.147	14	18	3	4	6	4	0	0	0	17	17	15	15	16	14	3	3	3	2	2	1	6461800	3976500	3525500	916580	835930	310760	2.582	1.47	3.804	0.345	0.277	0.19
Biological Process	GO:1903047	6	mitotic cell cycle process	0.129697	Q15008	26S proteasome non-ATPase regulatory subunit 6	0.606	Down	0.0119007	PSMD6	12.1	45.531	27.239	19	4	4	2	6	2	2	4	3	4	4	4	4	4	3	4	4	4	4	4	3	4391200	6771400	1781900	3371600	3502000	2140300	1.281	1.826	1.403	0.926	0.848	0.957
Biological Process	GO:1903047	6	mitotic cell cycle process	0.129697	P31947	14-3-3 protein sigma	0.409	Down	0.0101	SFN	37.1	27.774	127.26	38	9	6	12	8	8	4	4	2	7	8	9	5	7	4	6	5	6	4	4	2	228810000	234060000	120350000	134190000	134760000	50257000	1.623	1.536	2.305	0.896	0.794	0.547
Biological Process	GO:1903047	6	mitotic cell cycle process	0.129697	Q71UM5	40S ribosomal protein S27-like	0.504	Down	0.011282	RPS27L	22.6	9.4771	3.0926	6	2	2	2	1	1	1	1	0	2	1	1	2	2	1	2	1	1	2	2	1	19902000	14524000	6724600	7879900	12400000	5365600	1.908	1.288	1.741	0.712	0.988	0.789
Biological Process	GO:1903047	6	mitotic cell cycle process	0.129697	P28070	Proteasome subunit beta type-4	0.448	Down	0.02462	PSMB4	31.1	29.204	27.088	19	6	6	5	4	1	5	3	1	4	5	3	4	6	3	4	5	3	4	6	3	39270000	57148000	29814000	25419000	34915000	15876000	1.242	1.672	2.548	0.757	0.918	0.771
Biological Process	GO:1903047	6	mitotic cell cycle process	0.129697	Q99502	Eyes absent homolog 1	0.666	Down	0.0189799	EYA1	2.4	64.593	1.9129	3	1	1	2	0	1	0	0	0	1	1	1	1	1	0	1	1	1	1	1	0	30608000	38388000	10608000	23193000	24338000	0	1.285	1.491	1.202	0.917	0.848
Biological Process	GO:1903047	6	mitotic cell cycle process	0.129697	P28072	Proteasome subunit beta type-6	0.512	Down	0.0156837	PSMB6	13	25.357	8.82	10	3	3	3	2	2	1	1	1	3	2	2	2	2	2	3	2	2	2	2	2	34720000	52874000	20617000	27921000	24247000	16250000	1.258	1.773	2.017	0.953	0.73	0.903
Biological Process	GO:1903047	6	mitotic cell cycle process	0.129697	Q9HD42	Charged multivesicular body protein 1a	0.449	Down	0.035704	CHMP1A	8.7	21.703	2.4011	2	2	2	1	1	0	0	0	0	2	1	0	1	0	1	2	1	0	1	0	1	1763200	1465100	0	683640	0	493620	1.709	1.313		0.624		0.733
Biological Process	GO:0061041	7	regulation of wound healing	0.23526	P06396	Gelsolin	0.08	Down	0.044536	GSN	33.6	85.696	256.43	35	20	8	12	7	11	3	1	1	19	16	18	15	14	15	7	5	7	4	2	4	49607000	15273000	50188000	2030000	3091500	7460400	2.489	0.709	6.798	0.095	0.129	0.574
Biological Process	GO:0061041	7	regulation of wound healing	0.23526	P07355	Annexin A2	0.279	Down	0.0059359	ANXA2	62.8	38.604	323.31	168	18	18	43	25	27	26	27	20	18	14	16	15	16	16	18	14	16	15	16	16	887470000	518070000	335260000	243040000	203670000	153130000	2.428	1.311	2.476	0.626	0.463	0.643
Biological Process	GO:0032846	5	positive regulation of homeostatic process	0.177543	P33176	Kinesin-1 heavy chain	0.546	Down	0.042524	KIF5B	13.2	109.68	22.62	28	10	6	6	6	0	6	6	4	8	7	4	7	8	4	5	6	3	5	5	2	1483700	1633300	521690	714650	1230600	463370	1.571	1.6	1.493	0.713	1.082	0.753
Biological Process	GO:0032846	5	positive regulation of homeostatic process	0.177543	P27361	Mitogen-activated protein kinase 3	0.15	Down	0.00097886	MAPK3	18.5	43.135	10.767	8	6	4	4	2	1	0	0	1	6	6	4	3	3	2	4	4	2	1	1	1	4404100	3320400	1138100	783840	489290	288570	2.705	1.886	1.888	0.453	0.25	0.272
Biological Process	GO:0032846	5	positive regulation of homeostatic process	0.177543	P30626	Sorcin	0.595	Down	0.03778	SRI	19.2	21.676	5.1204	6	4	4	1	2	1	1	0	1	2	2	3	3	2	2	2	2	3	3	2	2	5839500	4973700	2891400	3483400	4286600	2614300	1.552	1.223	2.075	0.872	0.947	1.065
Biological Process	GO:0002253	7	activation of immune response	0.171393	P27361	Mitogen-activated protein kinase 3	0.15	Down	0.00097886	MAPK3	18.5	43.135	10.767	8	6	4	4	2	1	0	0	1	6	6	4	3	3	2	4	4	2	1	1	1	4404100	3320400	1138100	783840	489290	288570	2.705	1.886	1.888	0.453	0.25	0.272
Biological Process	GO:0002253	7	activation of immune response	0.171393	P10909	Clusterin	0.183	Down	0.027979	CLU	27.6	52.494	323.31	70	10	10	15	16	18	4	9	8	10	10	10	8	10	9	10	10	10	8	10	9	237020000	262030000	253660000	33505000	102090000	62773000	1.596	1.632	4.611	0.212	0.571	0.648
Biological Process	GO:0002253	7	activation of immune response	0.171393	Q15008	26S proteasome non-ATPase regulatory subunit 6	0.606	Down	0.0119007	PSMD6	12.1	45.531	27.239	19	4	4	2	6	2	2	4	3	4	4	4	4	4	3	4	4	4	4	4	3	4391200	6771400	1781900	3371600	3502000	2140300	1.281	1.826	1.403	0.926	0.848	0.957
Biological Process	GO:0002253	7	activation of immune response	0.171393	P0C0L5	Complement C4-B	0.056	Down	0.00093612	C4B	5.8	192.75	29.031	4	10	2	2	1	0	0	1	0	9	7	9	8	9	9	1	1	1	1	1	1	1729100	1709300	824490	177700	66202	57463	2.426	2.218	3.124	0.235	0.077	0.124
Biological Process	GO:0002253	7	activation of immune response	0.171393	P28070	Proteasome subunit beta type-4	0.448	Down	0.02462	PSMB4	31.1	29.204	27.088	19	6	6	5	4	1	5	3	1	4	5	3	4	6	3	4	5	3	4	6	3	39270000	57148000	29814000	25419000	34915000	15876000	1.242	1.672	2.548	0.757	0.918	0.771
Biological Process	GO:0002253	7	activation of immune response	0.171393	P28072	Proteasome subunit beta type-6	0.512	Down	0.0156837	PSMB6	13	25.357	8.82	10	3	3	3	2	2	1	1	1	3	2	2	2	2	2	3	2	2	2	2	2	34720000	52874000	20617000	27921000	24247000	16250000	1.258	1.773	2.017	0.953	0.73	0.903
Biological Process	GO:0002460	5	adaptive immune response based on somatic recombination of immune receptors built from immunoglobulin superfamily domains	0.164193	P10909	Clusterin	0.183	Down	0.027979	CLU	27.6	52.494	323.31	70	10	10	15	16	18	4	9	8	10	10	10	8	10	9	10	10	10	8	10	9	237020000	262030000	253660000	33505000	102090000	62773000	1.596	1.632	4.611	0.212	0.571	0.648
Biological Process	GO:0002460	5	adaptive immune response based on somatic recombination of immune receptors built from immunoglobulin superfamily domains	0.164193	P0C0L5	Complement C4-B	0.056	Down	0.00093612	C4B	5.8	192.75	29.031	4	10	2	2	1	0	0	1	0	9	7	9	8	9	9	1	1	1	1	1	1	1729100	1709300	824490	177700	66202	57463	2.426	2.218	3.124	0.235	0.077	0.124
Biological Process	GO:2000134	10	negative regulation of G1/S transition of mitotic cell cycle	0.0538061	P31947	14-3-3 protein sigma	0.409	Down	0.0101	SFN	37.1	27.774	127.26	38	9	6	12	8	8	4	4	2	7	8	9	5	7	4	6	5	6	4	4	2	228810000	234060000	120350000	134190000	134760000	50257000	1.623	1.536	2.305	0.896	0.794	0.547
Biological Process	GO:2000134	10	negative regulation of G1/S transition of mitotic cell cycle	0.0538061	Q71UM5	40S ribosomal protein S27-like	0.504	Down	0.011282	RPS27L	22.6	9.4771	3.0926	6	2	2	2	1	1	1	1	0	2	1	1	2	2	1	2	1	1	2	2	1	19902000	14524000	6724600	7879900	12400000	5365600	1.908	1.288	1.741	0.712	0.988	0.789
Biological Process	GO:0000077	9	DNA damage checkpoint	0.086628	P31947	14-3-3 protein sigma	0.409	Down	0.0101	SFN	37.1	27.774	127.26	38	9	6	12	8	8	4	4	2	7	8	9	5	7	4	6	5	6	4	4	2	228810000	234060000	120350000	134190000	134760000	50257000	1.623	1.536	2.305	0.896	0.794	0.547
Biological Process	GO:0000077	9	DNA damage checkpoint	0.086628	Q71UM5	40S ribosomal protein S27-like	0.504	Down	0.011282	RPS27L	22.6	9.4771	3.0926	6	2	2	2	1	1	1	1	0	2	1	1	2	2	1	2	1	1	2	2	1	19902000	14524000	6724600	7879900	12400000	5365600	1.908	1.288	1.741	0.712	0.988	0.789
Biological Process	GO:0045786	6	negative regulation of cell cycle	0.14383	Q02750	Dual specificity mitogen-activated protein kinase kinase 1	0.054	Down	0.033299	MAP2K1	5.1	43.439	8.485	4	3	3	0	0	1	2	1	0	1	2	2	3	3	2	1	2	2	3	3	2	593720000	145040000	660540000	69996000	34750000	26518000	2.483	0.562	7.461	0.275	0.121	0.17
Biological Process	GO:0045786	6	negative regulation of cell cycle	0.14383	Q15008	26S proteasome non-ATPase regulatory subunit 6	0.606	Down	0.0119007	PSMD6	12.1	45.531	27.239	19	4	4	2	6	2	2	4	3	4	4	4	4	4	3	4	4	4	4	4	3	4391200	6771400	1781900	3371600	3502000	2140300	1.281	1.826	1.403	0.926	0.848	0.957
Biological Process	GO:0045786	6	negative regulation of cell cycle	0.14383	P31947	14-3-3 protein sigma	0.409	Down	0.0101	SFN	37.1	27.774	127.26	38	9	6	12	8	8	4	4	2	7	8	9	5	7	4	6	5	6	4	4	2	228810000	234060000	120350000	134190000	134760000	50257000	1.623	1.536	2.305	0.896	0.794	0.547
Biological Process	GO:0045786	6	negative regulation of cell cycle	0.14383	Q71UM5	40S ribosomal protein S27-like	0.504	Down	0.011282	RPS27L	22.6	9.4771	3.0926	6	2	2	2	1	1	1	1	0	2	1	1	2	2	1	2	1	1	2	2	1	19902000	14524000	6724600	7879900	12400000	5365600	1.908	1.288	1.741	0.712	0.988	0.789
Biological Process	GO:0045786	6	negative regulation of cell cycle	0.14383	P28070	Proteasome subunit beta type-4	0.448	Down	0.02462	PSMB4	31.1	29.204	27.088	19	6	6	5	4	1	5	3	1	4	5	3	4	6	3	4	5	3	4	6	3	39270000	57148000	29814000	25419000	34915000	15876000	1.242	1.672	2.548	0.757	0.918	0.771
Biological Process	GO:0045786	6	negative regulation of cell cycle	0.14383	P28072	Proteasome subunit beta type-6	0.512	Down	0.0156837	PSMB6	13	25.357	8.82	10	3	3	3	2	2	1	1	1	3	2	2	2	2	2	3	2	2	2	2	2	34720000	52874000	20617000	27921000	24247000	16250000	1.258	1.773	2.017	0.953	0.73	0.903
Biological Process	GO:0022402	5	cell cycle process	0.104855	Q02750	Dual specificity mitogen-activated protein kinase kinase 1	0.054	Down	0.033299	MAP2K1	5.1	43.439	8.485	4	3	3	0	0	1	2	1	0	1	2	2	3	3	2	1	2	2	3	3	2	593720000	145040000	660540000	69996000	34750000	26518000	2.483	0.562	7.461	0.275	0.121	0.17
Biological Process	GO:0022402	5	cell cycle process	0.104855	P15311	Ezrin	0.48	Down	0.04462	EZR	28.2	69.412	100.17	39	16	7	10	6	10	6	4	3	15	15	14	12	14	11	6	6	6	4	5	4	58827000	57090000	37494000	46846000	33357000	19834000	1.487	1.335	2.559	1.115	0.7	0.769
Biological Process	GO:0022402	5	cell cycle process	0.104855	P68366	Tubulin alpha-4A chain	0.103	Down	0.0024179	TUBA4A	52.2	49.924	14.147	14	18	3	4	6	4	0	0	0	17	17	15	15	16	14	3	3	3	2	2	1	6461800	3976500	3525500	916580	835930	310760	2.582	1.47	3.804	0.345	0.277	0.19
Biological Process	GO:0022402	5	cell cycle process	0.104855	Q15008	26S proteasome non-ATPase regulatory subunit 6	0.606	Down	0.0119007	PSMD6	12.1	45.531	27.239	19	4	4	2	6	2	2	4	3	4	4	4	4	4	3	4	4	4	4	4	3	4391200	6771400	1781900	3371600	3502000	2140300	1.281	1.826	1.403	0.926	0.848	0.957
Biological Process	GO:0022402	5	cell cycle process	0.104855	P31947	14-3-3 protein sigma	0.409	Down	0.0101	SFN	37.1	27.774	127.26	38	9	6	12	8	8	4	4	2	7	8	9	5	7	4	6	5	6	4	4	2	228810000	234060000	120350000	134190000	134760000	50257000	1.623	1.536	2.305	0.896	0.794	0.547
Biological Process	GO:0022402	5	cell cycle process	0.104855	Q71UM5	40S ribosomal protein S27-like	0.504	Down	0.011282	RPS27L	22.6	9.4771	3.0926	6	2	2	2	1	1	1	1	0	2	1	1	2	2	1	2	1	1	2	2	1	19902000	14524000	6724600	7879900	12400000	5365600	1.908	1.288	1.741	0.712	0.988	0.789
Biological Process	GO:0022402	5	cell cycle process	0.104855	P28070	Proteasome subunit beta type-4	0.448	Down	0.02462	PSMB4	31.1	29.204	27.088	19	6	6	5	4	1	5	3	1	4	5	3	4	6	3	4	5	3	4	6	3	39270000	57148000	29814000	25419000	34915000	15876000	1.242	1.672	2.548	0.757	0.918	0.771
Biological Process	GO:0022402	5	cell cycle process	0.104855	Q99502	Eyes absent homolog 1	0.666	Down	0.0189799	EYA1	2.4	64.593	1.9129	3	1	1	2	0	1	0	0	0	1	1	1	1	1	0	1	1	1	1	1	0	30608000	38388000	10608000	23193000	24338000	0	1.285	1.491	1.202	0.917	0.848
Biological Process	GO:0022402	5	cell cycle process	0.104855	P28072	Proteasome subunit beta type-6	0.512	Down	0.0156837	PSMB6	13	25.357	8.82	10	3	3	3	2	2	1	1	1	3	2	2	2	2	2	3	2	2	2	2	2	34720000	52874000	20617000	27921000	24247000	16250000	1.258	1.773	2.017	0.953	0.73	0.903
Biological Process	GO:0022402	5	cell cycle process	0.104855	Q9HD42	Charged multivesicular body protein 1a	0.449	Down	0.035704	CHMP1A	8.7	21.703	2.4011	2	2	2	1	1	0	0	0	0	2	1	0	1	0	1	2	1	0	1	0	1	1763200	1465100	0	683640	0	493620	1.709	1.313		0.624		0.733
Biological Process	GO:0010948	7	negative regulation of cell cycle process	0.073166	Q15008	26S proteasome non-ATPase regulatory subunit 6	0.606	Down	0.0119007	PSMD6	12.1	45.531	27.239	19	4	4	2	6	2	2	4	3	4	4	4	4	4	3	4	4	4	4	4	3	4391200	6771400	1781900	3371600	3502000	2140300	1.281	1.826	1.403	0.926	0.848	0.957
Biological Process	GO:0010948	7	negative regulation of cell cycle process	0.073166	P31947	14-3-3 protein sigma	0.409	Down	0.0101	SFN	37.1	27.774	127.26	38	9	6	12	8	8	4	4	2	7	8	9	5	7	4	6	5	6	4	4	2	228810000	234060000	120350000	134190000	134760000	50257000	1.623	1.536	2.305	0.896	0.794	0.547
Biological Process	GO:0010948	7	negative regulation of cell cycle process	0.073166	Q71UM5	40S ribosomal protein S27-like	0.504	Down	0.011282	RPS27L	22.6	9.4771	3.0926	6	2	2	2	1	1	1	1	0	2	1	1	2	2	1	2	1	1	2	2	1	19902000	14524000	6724600	7879900	12400000	5365600	1.908	1.288	1.741	0.712	0.988	0.789
Biological Process	GO:0010948	7	negative regulation of cell cycle process	0.073166	P28070	Proteasome subunit beta type-4	0.448	Down	0.02462	PSMB4	31.1	29.204	27.088	19	6	6	5	4	1	5	3	1	4	5	3	4	6	3	4	5	3	4	6	3	39270000	57148000	29814000	25419000	34915000	15876000	1.242	1.672	2.548	0.757	0.918	0.771
Biological Process	GO:0010948	7	negative regulation of cell cycle process	0.073166	P28072	Proteasome subunit beta type-6	0.512	Down	0.0156837	PSMB6	13	25.357	8.82	10	3	3	3	2	2	1	1	1	3	2	2	2	2	2	3	2	2	2	2	2	34720000	52874000	20617000	27921000	24247000	16250000	1.258	1.773	2.017	0.953	0.73	0.903
Biological Process	GO:1901987	7	regulation of cell cycle phase transition	0.101308	Q15008	26S proteasome non-ATPase regulatory subunit 6	0.606	Down	0.0119007	PSMD6	12.1	45.531	27.239	19	4	4	2	6	2	2	4	3	4	4	4	4	4	3	4	4	4	4	4	3	4391200	6771400	1781900	3371600	3502000	2140300	1.281	1.826	1.403	0.926	0.848	0.957
Biological Process	GO:1901987	7	regulation of cell cycle phase transition	0.101308	P31947	14-3-3 protein sigma	0.409	Down	0.0101	SFN	37.1	27.774	127.26	38	9	6	12	8	8	4	4	2	7	8	9	5	7	4	6	5	6	4	4	2	228810000	234060000	120350000	134190000	134760000	50257000	1.623	1.536	2.305	0.896	0.794	0.547
Biological Process	GO:1901987	7	regulation of cell cycle phase transition	0.101308	Q71UM5	40S ribosomal protein S27-like	0.504	Down	0.011282	RPS27L	22.6	9.4771	3.0926	6	2	2	2	1	1	1	1	0	2	1	1	2	2	1	2	1	1	2	2	1	19902000	14524000	6724600	7879900	12400000	5365600	1.908	1.288	1.741	0.712	0.988	0.789
Biological Process	GO:1901987	7	regulation of cell cycle phase transition	0.101308	P28070	Proteasome subunit beta type-4	0.448	Down	0.02462	PSMB4	31.1	29.204	27.088	19	6	6	5	4	1	5	3	1	4	5	3	4	6	3	4	5	3	4	6	3	39270000	57148000	29814000	25419000	34915000	15876000	1.242	1.672	2.548	0.757	0.918	0.771
Biological Process	GO:1901987	7	regulation of cell cycle phase transition	0.101308	P28072	Proteasome subunit beta type-6	0.512	Down	0.0156837	PSMB6	13	25.357	8.82	10	3	3	3	2	2	1	1	1	3	2	2	2	2	2	3	2	2	2	2	2	34720000	52874000	20617000	27921000	24247000	16250000	1.258	1.773	2.017	0.953	0.73	0.903
Biological Process	GO:0043207	4	response to external biotic stimulus	0.23328	P00738	Haptoglobin	0.203	Down	0.022302	HP	12.3	45.205	11.888	29	6	6	3	4	7	4	7	4	6	5	6	5	5	5	6	5	6	5	5	5	156470000	134410000	151310000	32949000	62841000	36987000	1.743	1.385	4.55	0.346	0.582	0.632
Biological Process	GO:0043207	4	response to external biotic stimulus	0.23328	P27361	Mitogen-activated protein kinase 3	0.15	Down	0.00097886	MAPK3	18.5	43.135	10.767	8	6	4	4	2	1	0	0	1	6	6	4	3	3	2	4	4	2	1	1	1	4404100	3320400	1138100	783840	489290	288570	2.705	1.886	1.888	0.453	0.25	0.272
Biological Process	GO:0043207	4	response to external biotic stimulus	0.23328	P10909	Clusterin	0.183	Down	0.027979	CLU	27.6	52.494	323.31	70	10	10	15	16	18	4	9	8	10	10	10	8	10	9	10	10	10	8	10	9	237020000	262030000	253660000	33505000	102090000	62773000	1.596	1.632	4.611	0.212	0.571	0.648
Biological Process	GO:0043207	4	response to external biotic stimulus	0.23328	P12429	Annexin A3	0.015	Down	0.0033839	ANXA3	43	36.375	86.457	39	13	13	16	9	13	1	0	0	13	10	12	5	3	1	13	10	12	5	3	1	73099000	16182000	30260000	1403300	449940	542640	3.839	0.786	4.291	0.069	0.02	0.044
Biological Process	GO:0043207	4	response to external biotic stimulus	0.23328	P0C0L5	Complement C4-B	0.056	Down	0.00093612	C4B	5.8	192.75	29.031	4	10	2	2	1	0	0	1	0	9	7	9	8	9	9	1	1	1	1	1	1	1729100	1709300	824490	177700	66202	57463	2.426	2.218	3.124	0.235	0.077	0.124
Biological Process	GO:0048146	7	positive regulation of fibroblast proliferation	0.086628	P06703	Protein S100-A6	0.274	Down	0.021297	S100A6	24.4	10.18	10.14	12	3	3	3	1	2	2	2	2	3	2	2	2	3	2	3	2	2	2	3	2	2411700000	1068100000	678150000	324630000	551200000	437870000	2.823	1.156	2.144	0.358	0.535	0.786
Biological Process	GO:0048146	7	positive regulation of fibroblast proliferation	0.086628	P07355	Annexin A2	0.279	Down	0.0059359	ANXA2	62.8	38.604	323.31	168	18	18	43	25	27	26	27	20	18	14	16	15	16	16	18	14	16	15	16	16	887470000	518070000	335260000	243040000	203670000	153130000	2.428	1.311	2.476	0.626	0.463	0.643
Biological Process	GO:0003334	9	keratinocyte development	0.00427237	P31947	14-3-3 protein sigma	0.409	Down	0.0101	SFN	37.1	27.774	127.26	38	9	6	12	8	8	4	4	2	7	8	9	5	7	4	6	5	6	4	4	2	228810000	234060000	120350000	134190000	134760000	50257000	1.623	1.536	2.305	0.896	0.794	0.547
Biological Process	GO:0003334	9	keratinocyte development	0.00427237	O75369	Filamin-B	0.17	Down	0.031543	FLNB	48	278.16	323.31	394	95	84	137	67	76	30	57	27	93	67	74	46	66	42	83	58	65	38	57	34	146720000	33897000	30485000	9872100	25121000	9145800	3.681	0.787	2.066	0.233	0.524	0.352
Biological Process	GO:0019724	6	B cell mediated immunity	0.086628	P10909	Clusterin	0.183	Down	0.027979	CLU	27.6	52.494	323.31	70	10	10	15	16	18	4	9	8	10	10	10	8	10	9	10	10	10	8	10	9	237020000	262030000	253660000	33505000	102090000	62773000	1.596	1.632	4.611	0.212	0.571	0.648
Biological Process	GO:0019724	6	B cell mediated immunity	0.086628	P0C0L5	Complement C4-B	0.056	Down	0.00093612	C4B	5.8	192.75	29.031	4	10	2	2	1	0	0	1	0	9	7	9	8	9	9	1	1	1	1	1	1	1729100	1709300	824490	177700	66202	57463	2.426	2.218	3.124	0.235	0.077	0.124
Biological Process	GO:0050778	6	positive regulation of immune response	0.158771	P27361	Mitogen-activated protein kinase 3	0.15	Down	0.00097886	MAPK3	18.5	43.135	10.767	8	6	4	4	2	1	0	0	1	6	6	4	3	3	2	4	4	2	1	1	1	4404100	3320400	1138100	783840	489290	288570	2.705	1.886	1.888	0.453	0.25	0.272
Biological Process	GO:0050778	6	positive regulation of immune response	0.158771	P10909	Clusterin	0.183	Down	0.027979	CLU	27.6	52.494	323.31	70	10	10	15	16	18	4	9	8	10	10	10	8	10	9	10	10	10	8	10	9	237020000	262030000	253660000	33505000	102090000	62773000	1.596	1.632	4.611	0.212	0.571	0.648
Biological Process	GO:0050778	6	positive regulation of immune response	0.158771	P02790	Hemopexin	0.363	Down	0.046037	HPX	2.8	51.676	12.412	7	1	1	1	2	1	1	1	1	1	1	1	1	1	1	1	1	1	1	1	1	13348000	16477000	12047000	7938200	6012200	6343600	1.375	1.57	3.352	0.77	0.514	1.002
Biological Process	GO:0050778	6	positive regulation of immune response	0.158771	Q15008	26S proteasome non-ATPase regulatory subunit 6	0.606	Down	0.0119007	PSMD6	12.1	45.531	27.239	19	4	4	2	6	2	2	4	3	4	4	4	4	4	3	4	4	4	4	4	3	4391200	6771400	1781900	3371600	3502000	2140300	1.281	1.826	1.403	0.926	0.848	0.957
Biological Process	GO:0050778	6	positive regulation of immune response	0.158771	P0C0L5	Complement C4-B	0.056	Down	0.00093612	C4B	5.8	192.75	29.031	4	10	2	2	1	0	0	1	0	9	7	9	8	9	9	1	1	1	1	1	1	1729100	1709300	824490	177700	66202	57463	2.426	2.218	3.124	0.235	0.077	0.124
Biological Process	GO:0050778	6	positive regulation of immune response	0.158771	P28070	Proteasome subunit beta type-4	0.448	Down	0.02462	PSMB4	31.1	29.204	27.088	19	6	6	5	4	1	5	3	1	4	5	3	4	6	3	4	5	3	4	6	3	39270000	57148000	29814000	25419000	34915000	15876000	1.242	1.672	2.548	0.757	0.918	0.771
Biological Process	GO:0050778	6	positive regulation of immune response	0.158771	P28072	Proteasome subunit beta type-6	0.512	Down	0.0156837	PSMB6	13	25.357	8.82	10	3	3	3	2	2	1	1	1	3	2	2	2	2	2	3	2	2	2	2	2	34720000	52874000	20617000	27921000	24247000	16250000	1.258	1.773	2.017	0.953	0.73	0.903
Biological Process	GO:0031571	12	mitotic G1 DNA damage checkpoint	0.0441237	P31947	14-3-3 protein sigma	0.409	Down	0.0101	SFN	37.1	27.774	127.26	38	9	6	12	8	8	4	4	2	7	8	9	5	7	4	6	5	6	4	4	2	228810000	234060000	120350000	134190000	134760000	50257000	1.623	1.536	2.305	0.896	0.794	0.547
Biological Process	GO:0031571	12	mitotic G1 DNA damage checkpoint	0.0441237	Q71UM5	40S ribosomal protein S27-like	0.504	Down	0.011282	RPS27L	22.6	9.4771	3.0926	6	2	2	2	1	1	1	1	0	2	1	1	2	2	1	2	1	1	2	2	1	19902000	14524000	6724600	7879900	12400000	5365600	1.908	1.288	1.741	0.712	0.988	0.789
Biological Process	GO:1901988	8	negative regulation of cell cycle phase transition	0.046656	Q15008	26S proteasome non-ATPase regulatory subunit 6	0.606	Down	0.0119007	PSMD6	12.1	45.531	27.239	19	4	4	2	6	2	2	4	3	4	4	4	4	4	3	4	4	4	4	4	3	4391200	6771400	1781900	3371600	3502000	2140300	1.281	1.826	1.403	0.926	0.848	0.957
Biological Process	GO:1901988	8	negative regulation of cell cycle phase transition	0.046656	P31947	14-3-3 protein sigma	0.409	Down	0.0101	SFN	37.1	27.774	127.26	38	9	6	12	8	8	4	4	2	7	8	9	5	7	4	6	5	6	4	4	2	228810000	234060000	120350000	134190000	134760000	50257000	1.623	1.536	2.305	0.896	0.794	0.547
Biological Process	GO:1901988	8	negative regulation of cell cycle phase transition	0.046656	Q71UM5	40S ribosomal protein S27-like	0.504	Down	0.011282	RPS27L	22.6	9.4771	3.0926	6	2	2	2	1	1	1	1	0	2	1	1	2	2	1	2	1	1	2	2	1	19902000	14524000	6724600	7879900	12400000	5365600	1.908	1.288	1.741	0.712	0.988	0.789
Biological Process	GO:1901988	8	negative regulation of cell cycle phase transition	0.046656	P28070	Proteasome subunit beta type-4	0.448	Down	0.02462	PSMB4	31.1	29.204	27.088	19	6	6	5	4	1	5	3	1	4	5	3	4	6	3	4	5	3	4	6	3	39270000	57148000	29814000	25419000	34915000	15876000	1.242	1.672	2.548	0.757	0.918	0.771
Biological Process	GO:1901988	8	negative regulation of cell cycle phase transition	0.046656	P28072	Proteasome subunit beta type-6	0.512	Down	0.0156837	PSMB6	13	25.357	8.82	10	3	3	3	2	2	1	1	1	3	2	2	2	2	2	3	2	2	2	2	2	34720000	52874000	20617000	27921000	24247000	16250000	1.258	1.773	2.017	0.953	0.73	0.903
Biological Process	GO:0006281	8	DNA repair	0.213349	Q92905	COP9 signalosome complex subunit 5	0.499	Down	0.020183	COPS5	12	37.578	5.672	9	4	4	1	4	0	2	1	1	3	3	2	4	3	2	3	3	2	4	3	2	2195000	3770200	859870	1556000	1779100	687540	1.296	2.058	1.372	0.865	0.872	0.622
Biological Process	GO:0006281	8	DNA repair	0.213349	P54727	UV excision repair protein RAD23 homolog B	0.374	Down	0.024544	RAD23B	18.3	43.171	12.837	28	8	5	5	6	5	5	4	3	8	8	8	8	7	6	5	5	5	5	4	4	167980000	83640000	45618000	58486000	59529000	21743000	2.461	1.133	1.804	0.807	0.724	0.489
Biological Process	GO:0006281	8	DNA repair	0.213349	Q71UM5	40S ribosomal protein S27-like	0.504	Down	0.011282	RPS27L	22.6	9.4771	3.0926	6	2	2	2	1	1	1	1	0	2	1	1	2	2	1	2	1	1	2	2	1	19902000	14524000	6724600	7879900	12400000	5365600	1.908	1.288	1.741	0.712	0.988	0.789
Biological Process	GO:0006281	8	DNA repair	0.213349	Q99502	Eyes absent homolog 1	0.666	Down	0.0189799	EYA1	2.4	64.593	1.9129	3	1	1	2	0	1	0	0	0	1	1	1	1	1	0	1	1	1	1	1	0	30608000	38388000	10608000	23193000	24338000	0	1.285	1.491	1.202	0.917	0.848
Biological Process	GO:0050852	11	T cell receptor signaling pathway	0.259207	Q15008	26S proteasome non-ATPase regulatory subunit 6	0.606	Down	0.0119007	PSMD6	12.1	45.531	27.239	19	4	4	2	6	2	2	4	3	4	4	4	4	4	3	4	4	4	4	4	3	4391200	6771400	1781900	3371600	3502000	2140300	1.281	1.826	1.403	0.926	0.848	0.957
Biological Process	GO:0050852	11	T cell receptor signaling pathway	0.259207	P28070	Proteasome subunit beta type-4	0.448	Down	0.02462	PSMB4	31.1	29.204	27.088	19	6	6	5	4	1	5	3	1	4	5	3	4	6	3	4	5	3	4	6	3	39270000	57148000	29814000	25419000	34915000	15876000	1.242	1.672	2.548	0.757	0.918	0.771
Biological Process	GO:0050852	11	T cell receptor signaling pathway	0.259207	P28072	Proteasome subunit beta type-6	0.512	Down	0.0156837	PSMB6	13	25.357	8.82	10	3	3	3	2	2	1	1	1	3	2	2	2	2	2	3	2	2	2	2	2	34720000	52874000	20617000	27921000	24247000	16250000	1.258	1.773	2.017	0.953	0.73	0.903
Biological Process	GO:0080134	5	regulation of response to stress	0.0371691	P10909	Clusterin	0.183	Down	0.027979	CLU	27.6	52.494	323.31	70	10	10	15	16	18	4	9	8	10	10	10	8	10	9	10	10	10	8	10	9	237020000	262030000	253660000	33505000	102090000	62773000	1.596	1.632	4.611	0.212	0.571	0.648
Biological Process	GO:0080134	5	regulation of response to stress	0.0371691	Q02750	Dual specificity mitogen-activated protein kinase kinase 1	0.054	Down	0.033299	MAP2K1	5.1	43.439	8.485	4	3	3	0	0	1	2	1	0	1	2	2	3	3	2	1	2	2	3	3	2	593720000	145040000	660540000	69996000	34750000	26518000	2.483	0.562	7.461	0.275	0.121	0.17
Biological Process	GO:0080134	5	regulation of response to stress	0.0371691	P02790	Hemopexin	0.363	Down	0.046037	HPX	2.8	51.676	12.412	7	1	1	1	2	1	1	1	1	1	1	1	1	1	1	1	1	1	1	1	1	13348000	16477000	12047000	7938200	6012200	6343600	1.375	1.57	3.352	0.77	0.514	1.002
Biological Process	GO:0080134	5	regulation of response to stress	0.0371691	P15311	Ezrin	0.48	Down	0.04462	EZR	28.2	69.412	100.17	39	16	7	10	6	10	6	4	3	15	15	14	12	14	11	6	6	6	4	5	4	58827000	57090000	37494000	46846000	33357000	19834000	1.487	1.335	2.559	1.115	0.7	0.769
Biological Process	GO:0080134	5	regulation of response to stress	0.0371691	Q15008	26S proteasome non-ATPase regulatory subunit 6	0.606	Down	0.0119007	PSMD6	12.1	45.531	27.239	19	4	4	2	6	2	2	4	3	4	4	4	4	4	3	4	4	4	4	4	3	4391200	6771400	1781900	3371600	3502000	2140300	1.281	1.826	1.403	0.926	0.848	0.957
Biological Process	GO:0080134	5	regulation of response to stress	0.0371691	P07355	Annexin A2	0.279	Down	0.0059359	ANXA2	62.8	38.604	323.31	168	18	18	43	25	27	26	27	20	18	14	16	15	16	16	18	14	16	15	16	16	887470000	518070000	335260000	243040000	203670000	153130000	2.428	1.311	2.476	0.626	0.463	0.643
Biological Process	GO:0080134	5	regulation of response to stress	0.0371691	P28070	Proteasome subunit beta type-4	0.448	Down	0.02462	PSMB4	31.1	29.204	27.088	19	6	6	5	4	1	5	3	1	4	5	3	4	6	3	4	5	3	4	6	3	39270000	57148000	29814000	25419000	34915000	15876000	1.242	1.672	2.548	0.757	0.918	0.771
Biological Process	GO:0080134	5	regulation of response to stress	0.0371691	Q99502	Eyes absent homolog 1	0.666	Down	0.0189799	EYA1	2.4	64.593	1.9129	3	1	1	2	0	1	0	0	0	1	1	1	1	1	0	1	1	1	1	1	0	30608000	38388000	10608000	23193000	24338000	0	1.285	1.491	1.202	0.917	0.848
Biological Process	GO:0080134	5	regulation of response to stress	0.0371691	P21980	Protein-glutamine gamma-glutamyltransferase 2	0.192	Down	0.041101	TGM2	24.2	77.328	99.757	41	14	14	10	8	8	0	10	5	13	11	10	5	11	5	13	11	10	5	11	5	68821000	19811000	12885000	4293100	18177000	2770700	3.477	0.926	1.758	0.204	0.762	0.214
Biological Process	GO:0080134	5	regulation of response to stress	0.0371691	P30040	Endoplasmic reticulum resident protein 29	0.629	Down	0.021783	ERP29	19.2	28.993	34.677	45	5	5	6	11	8	7	8	5	5	5	5	5	5	5	5	5	5	5	5	5	37110000	56152000	15779000	32895000	33974000	15367000	1.242	1.738	1.427	1.037	0.945	0.789
Biological Process	GO:0080134	5	regulation of response to stress	0.0371691	P27361	Mitogen-activated protein kinase 3	0.15	Down	0.00097886	MAPK3	18.5	43.135	10.767	8	6	4	4	2	1	0	0	1	6	6	4	3	3	2	4	4	2	1	1	1	4404100	3320400	1138100	783840	489290	288570	2.705	1.886	1.888	0.453	0.25	0.272
Biological Process	GO:0080134	5	regulation of response to stress	0.0371691	P06396	Gelsolin	0.08	Down	0.044536	GSN	33.6	85.696	256.43	35	20	8	12	7	11	3	1	1	19	16	18	15	14	15	7	5	7	4	2	4	49607000	15273000	50188000	2030000	3091500	7460400	2.489	0.709	6.798	0.095	0.129	0.574
Biological Process	GO:0080134	5	regulation of response to stress	0.0371691	Q92905	COP9 signalosome complex subunit 5	0.499	Down	0.020183	COPS5	12	37.578	5.672	9	4	4	1	4	0	2	1	1	3	3	2	4	3	2	3	3	2	4	3	2	2195000	3770200	859870	1556000	1779100	687540	1.296	2.058	1.372	0.865	0.872	0.622
Biological Process	GO:0080134	5	regulation of response to stress	0.0371691	P0C0L5	Complement C4-B	0.056	Down	0.00093612	C4B	5.8	192.75	29.031	4	10	2	2	1	0	0	1	0	9	7	9	8	9	9	1	1	1	1	1	1	1729100	1709300	824490	177700	66202	57463	2.426	2.218	3.124	0.235	0.077	0.124
Biological Process	GO:0080134	5	regulation of response to stress	0.0371691	P28072	Proteasome subunit beta type-6	0.512	Down	0.0156837	PSMB6	13	25.357	8.82	10	3	3	3	2	2	1	1	1	3	2	2	2	2	2	3	2	2	2	2	2	34720000	52874000	20617000	27921000	24247000	16250000	1.258	1.773	2.017	0.953	0.73	0.903
Biological Process	GO:0007093	8	mitotic cell cycle checkpoint	0.137034	P31947	14-3-3 protein sigma	0.409	Down	0.0101	SFN	37.1	27.774	127.26	38	9	6	12	8	8	4	4	2	7	8	9	5	7	4	6	5	6	4	4	2	228810000	234060000	120350000	134190000	134760000	50257000	1.623	1.536	2.305	0.896	0.794	0.547
Biological Process	GO:0007093	8	mitotic cell cycle checkpoint	0.137034	Q71UM5	40S ribosomal protein S27-like	0.504	Down	0.011282	RPS27L	22.6	9.4771	3.0926	6	2	2	2	1	1	1	1	0	2	1	1	2	2	1	2	1	1	2	2	1	19902000	14524000	6724600	7879900	12400000	5365600	1.908	1.288	1.741	0.712	0.988	0.789
Biological Process	GO:0009888	4	tissue development	0.019712	P09525	Annexin A4	0.077	Down	0.00179778	ANXA4	33.9	35.882	45.905	25	9	9	9	4	6	3	1	2	9	6	6	4	4	2	9	6	6	4	4	2	28347000	12449000	4391100	1711400	1752000	611990	3.685	1.497	1.542	0.209	0.189	0.123
Biological Process	GO:0009888	4	tissue development	0.019712	Q02750	Dual specificity mitogen-activated protein kinase kinase 1	0.054	Down	0.033299	MAP2K1	5.1	43.439	8.485	4	3	3	0	0	1	2	1	0	1	2	2	3	3	2	1	2	2	3	3	2	593720000	145040000	660540000	69996000	34750000	26518000	2.483	0.562	7.461	0.275	0.121	0.17
Biological Process	GO:0009888	4	tissue development	0.019712	P15311	Ezrin	0.48	Down	0.04462	EZR	28.2	69.412	100.17	39	16	7	10	6	10	6	4	3	15	15	14	12	14	11	6	6	6	4	5	4	58827000	57090000	37494000	46846000	33357000	19834000	1.487	1.335	2.559	1.115	0.7	0.769
Biological Process	GO:0009888	4	tissue development	0.019712	P31947	14-3-3 protein sigma	0.409	Down	0.0101	SFN	37.1	27.774	127.26	38	9	6	12	8	8	4	4	2	7	8	9	5	7	4	6	5	6	4	4	2	228810000	234060000	120350000	134190000	134760000	50257000	1.623	1.536	2.305	0.896	0.794	0.547
Biological Process	GO:0009888	4	tissue development	0.019712	O75369	Filamin-B	0.17	Down	0.031543	FLNB	48	278.16	323.31	394	95	84	137	67	76	30	57	27	93	67	74	46	66	42	83	58	65	38	57	34	146720000	33897000	30485000	9872100	25121000	9145800	3.681	0.787	2.066	0.233	0.524	0.352
Biological Process	GO:0009888	4	tissue development	0.019712	Q99502	Eyes absent homolog 1	0.666	Down	0.0189799	EYA1	2.4	64.593	1.9129	3	1	1	2	0	1	0	0	0	1	1	1	1	1	0	1	1	1	1	1	0	30608000	38388000	10608000	23193000	24338000	0	1.285	1.491	1.202	0.917	0.848
Biological Process	GO:0009888	4	tissue development	0.019712	Q13753	Laminin subunit gamma-2	0.003	Down	0.00140404	LAMC2	42.2	130.97	323.31	158	41	41	72	25	59	2	0	0	40	31	37	5	3	1	40	31	37	5	3	1	317670000	60802000	196920000	549290	779020	764800	3.523	0.624	5.896	0.006	0.007	0.013
Biological Process	GO:0009888	4	tissue development	0.019712	Q9UNW1	Multiple inositol polyphosphate phosphatase 1	0.104	Down	0.026856	MINPP1	7.6	55.051	9.8363	7	3	3	0	0	0	2	4	1	1	0	2	2	3	2	1	0	2	2	3	2	5705100	0	4783800	625280	2116700	355240	2.241		5.075	0.231	0.691	0.214
Biological Process	GO:0009888	4	tissue development	0.019712	P27361	Mitogen-activated protein kinase 3	0.15	Down	0.00097886	MAPK3	18.5	43.135	10.767	8	6	4	4	2	1	0	0	1	6	6	4	3	3	2	4	4	2	1	1	1	4404100	3320400	1138100	783840	489290	288570	2.705	1.886	1.888	0.453	0.25	0.272
Biological Process	GO:0009888	4	tissue development	0.019712	P21980	Protein-glutamine gamma-glutamyltransferase 2	0.192	Down	0.041101	TGM2	24.2	77.328	99.757	41	14	14	10	8	8	0	10	5	13	11	10	5	11	5	13	11	10	5	11	5	68821000	19811000	12885000	4293100	18177000	2770700	3.477	0.926	1.758	0.204	0.762	0.214
Biological Process	GO:0009888	4	tissue development	0.019712	P26447	Protein S100-A4	0.086	Down	0.023963	S100A4	35.6	11.728	7.7686	28	4	4	10	4	7	3	3	1	4	3	4	2	2	2	4	3	4	2	2	2	507500000	186910000	457350000	52890000	38743000	53958000	2.505	0.853	6.095	0.246	0.159	0.409
Biological Process	GO:0009888	4	tissue development	0.019712	P06396	Gelsolin	0.08	Down	0.044536	GSN	33.6	85.696	256.43	35	20	8	12	7	11	3	1	1	19	16	18	15	14	15	7	5	7	4	2	4	49607000	15273000	50188000	2030000	3091500	7460400	2.489	0.709	6.798	0.095	0.129	0.574
Biological Process	GO:0009888	4	tissue development	0.019712	Q13751	Laminin subunit beta-3	0.003	Down	0.0031013	LAMB3	36.7	129.57	323.31	150	37	37	63	29	58	0	0	0	37	27	36	3	2	2	37	27	36	3	2	2	272670000	51820000	152920000	1931400	229890	229960	3.639	0.64	5.51	0.024	0.003	0.005
Biological Process	GO:0009888	4	tissue development	0.019712	Q13765	Nascent polypeptide-associated complex subunit alpha	0.64	Down	0.0161794	NACA	19.5	23.384	62.673	18	3	3	3	4	2	3	4	2	3	3	3	3	3	3	3	3	3	3	3	3	42791000	33209000	15152000	26652000	27390000	16509000	1.695	1.216	1.62	0.994	0.901	1.003
Biological Process	GO:0009888	4	tissue development	0.019712	Q16787	Laminin subunit alpha-3	0.001	Down	0.0009187	LAMA3	20.8	366.65	323.31	185	61	60	71	40	73	1	0	0	57	51	60	2	1	1	56	51	59	2	1	1	125750000	35488000	91138000	36269	180890	132970	3.186	0.832	6.236	0.001	0.004	0.005

## Sheet: differentiation
GO Terms Level 1	GO Terms ID	GO Terms Level	GO Terms Description	Fisher's exact test P value	Protein accession	Protein description	Ratio	Regulated Type	P value	Gene name	Sequence coverage [%]	Mol. weight [kDa]	Score	MS/MS Counts	Peptides	Unique peptides	MS/MS Count E1	MS/MS Count E2	MS/MS Count E3	MS/MS Count M1	MS/MS Count M2	MS/MS Count M3	Peptides E1	Peptides E2	Peptides E3	Peptides M1	Peptides M2	Peptides M3	Unique peptides E1	Unique peptides E2	Unique peptides E3	Unique peptides M1	Unique peptides M2	Unique peptides M3	iBAQ E1	iBAQ E2	iBAQ E3	iBAQ M1	iBAQ M2	iBAQ M3	E1	E2	E3	M1	M2	M3
Biological Process	GO:0030855	6	epithelial cell differentiation	0.0915757	P09525	Annexin A4	0.077	Down	0.00179778	ANXA4	33.9	35.882	45.905	25	9	9	9	4	6	3	1	2	9	6	6	4	4	2	9	6	6	4	4	2	28347000	12449000	4391100	1711400	1752000	611990	3.685	1.497	1.542	0.209	0.189	0.123
Biological Process	GO:0030855	6	epithelial cell differentiation	0.0915757	Q02750	Dual specificity mitogen-activated protein kinase kinase 1	0.054	Down	0.033299	MAP2K1	5.1	43.439	8.485	4	3	3	0	0	1	2	1	0	1	2	2	3	3	2	1	2	2	3	3	2	593720000	145040000	660540000	69996000	34750000	26518000	2.483	0.562	7.461	0.275	0.121	0.17
Biological Process	GO:0030855	6	epithelial cell differentiation	0.0915757	P15311	Ezrin	0.48	Down	0.04462	EZR	28.2	69.412	100.17	39	16	7	10	6	10	6	4	3	15	15	14	12	14	11	6	6	6	4	5	4	58827000	57090000	37494000	46846000	33357000	19834000	1.487	1.335	2.559	1.115	0.7	0.769
Biological Process	GO:0030855	6	epithelial cell differentiation	0.0915757	P31947	14-3-3 protein sigma	0.409	Down	0.0101	SFN	37.1	27.774	127.26	38	9	6	12	8	8	4	4	2	7	8	9	5	7	4	6	5	6	4	4	2	228810000	234060000	120350000	134190000	134760000	50257000	1.623	1.536	2.305	0.896	0.794	0.547
Biological Process	GO:0030855	6	epithelial cell differentiation	0.0915757	O75369	Filamin-B	0.17	Down	0.031543	FLNB	48	278.16	323.31	394	95	84	137	67	76	30	57	27	93	67	74	46	66	42	83	58	65	38	57	34	146720000	33897000	30485000	9872100	25121000	9145800	3.681	0.787	2.066	0.233	0.524	0.352
Biological Process	GO:0030855	6	epithelial cell differentiation	0.0915757	Q99502	Eyes absent homolog 1	0.666	Down	0.0189799	EYA1	2.4	64.593	1.9129	3	1	1	2	0	1	0	0	0	1	1	1	1	1	0	1	1	1	1	1	0	30608000	38388000	10608000	23193000	24338000	0	1.285	1.491	1.202	0.917	0.848
Biological Process	GO:0030216	8	keratinocyte differentiation	0.0294137	Q02750	Dual specificity mitogen-activated protein kinase kinase 1	0.054	Down	0.033299	MAP2K1	5.1	43.439	8.485	4	3	3	0	0	1	2	1	0	1	2	2	3	3	2	1	2	2	3	3	2	593720000	145040000	660540000	69996000	34750000	26518000	2.483	0.562	7.461	0.275	0.121	0.17
Biological Process	GO:0030216	8	keratinocyte differentiation	0.0294137	P31947	14-3-3 protein sigma	0.409	Down	0.0101	SFN	37.1	27.774	127.26	38	9	6	12	8	8	4	4	2	7	8	9	5	7	4	6	5	6	4	4	2	228810000	234060000	120350000	134190000	134760000	50257000	1.623	1.536	2.305	0.896	0.794	0.547
Biological Process	GO:0030216	8	keratinocyte differentiation	0.0294137	O75369	Filamin-B	0.17	Down	0.031543	FLNB	48	278.16	323.31	394	95	84	137	67	76	30	57	27	93	67	74	46	66	42	83	58	65	38	57	34	146720000	33897000	30485000	9872100	25121000	9145800	3.681	0.787	2.066	0.233	0.524	0.352
Biological Process	GO:0009913	7	epidermal cell differentiation	0.0556945	Q02750	Dual specificity mitogen-activated protein kinase kinase 1	0.054	Down	0.033299	MAP2K1	5.1	43.439	8.485	4	3	3	0	0	1	2	1	0	1	2	2	3	3	2	1	2	2	3	3	2	593720000	145040000	660540000	69996000	34750000	26518000	2.483	0.562	7.461	0.275	0.121	0.17
Biological Process	GO:0009913	7	epidermal cell differentiation	0.0556945	P31947	14-3-3 protein sigma	0.409	Down	0.0101	SFN	37.1	27.774	127.26	38	9	6	12	8	8	4	4	2	7	8	9	5	7	4	6	5	6	4	4	2	228810000	234060000	120350000	134190000	134760000	50257000	1.623	1.536	2.305	0.896	0.794	0.547
Biological Process	GO:0009913	7	epidermal cell differentiation	0.0556945	O75369	Filamin-B	0.17	Down	0.031543	FLNB	48	278.16	323.31	394	95	84	137	67	76	30	57	27	93	67	74	46	66	42	83	58	65	38	57	34	146720000	33897000	30485000	9872100	25121000	9145800	3.681	0.787	2.066	0.233	0.524	0.352

[truncated: 6 more sheets: response, cell cycle, inflammation, growth, aging, migration]
